# Supplementary material for: Catalytic enantioselective addition of terminal 1,3-diynes to aromatic ketones: facile access to chiral nonracemic tertiary alcohols
Source: Royal Society of Chemistry journal article supplement (doi:10.1039/c1cc15968b), 2011-01-01

# Electronic Supplementary Information

## Enantioselective Addition of Terminal 1,3-Diynes to Aromatic Ketones Triggered by Cu-Hydroxycamphorsulfonamide Complexes

Tian-Lin Liu, Hai Ma, Fa-Guang Zhang, Yan Zheng, Jing Nie and Jun-An Ma\*

*Department of Chemistry, Tianjin University, Tianjin 300072, China*

\*Email: majun\_an68@tju.edu.cn

### Contents

|                                                                |                |
|----------------------------------------------------------------|----------------|
| <b>1. General Information</b>                                  | <b>S2</b>      |
| <b>2. Preparation of Ligands</b>                               | <b>S2–S3</b>   |
| <b>3. General Procedure for Catalyzed Addition</b>             | <b>S3–S11</b>  |
| <b>4. Further transformation and X-ray Analysis</b>            | <b>S11–S13</b> |
| <b>5. References</b>                                           | <b>S13</b>     |
| <b>6. NMR Spectra and HPLC Charts for the Addition Adducts</b> | <b>S14–S55</b> |
| <b>7. Basic crystal data for compound 4</b>                    | <b>S56</b>     |

## 1. General information:

$^1\text{H}$ ,  $^{13}\text{C}$  and  $^{19}\text{F}$  were recorded on Varian Mercury Plus 400 instruments or Bruker AV 400 MHz at 400 MHz ( $^1\text{H}$  NMR), 100 MHz ( $^{13}\text{C}$  NMR), as well as 376 MHz ( $^{19}\text{F}$  NMR). Chemical shifts were reported in ppm from the solvent resonance as the internal  $\text{Me}_4\text{Si}$ . MS were recorded on a VG-7070E or VG ZAB-HS spectrometer with the EI or ESI resource. Optical rotations were determined using an Autopol IV-T. IR spectra were recorded on an AVATAR 360 FT-IR spectrometer. Melting points were measured on a WRS-1A digital melting point apparatus and are uncorrected. HPLC analyses were carried out on a Hewlett Packard Model HP 1200 instrument. X-ray structural analyses was conducted on the XtaLAB mini (600 W, SHINE, CCD, 75mm, 0.1 electrons/pixel/sec).

## Materials:

Tetrahydrofuran (THF), diethyl ether and toluene were distilled from sodium/benzophenone prior to use;  $\text{CH}_2\text{Cl}_2$  (DCM) and  $\text{ClCH}_2\text{CH}_2\text{Cl}$  (DCE) were distilled from  $\text{CaH}_2$ . All purchased reagents were used without further purification. Analytical thin layer chromatography was performed on 0.20 mm Qingdao Haiyang silica gel plates. Silica gel (200-300 mesh) (from Qingdao Haiyang Chem. Company, Ltd.) was used for flash chromatography. Ligands **I–VI** were synthesized by known method.<sup>1</sup> Substituted terminal 1,3-Diynes were synthesized by literature.<sup>2</sup> Dimethylzinc (1.2M solution in toluene) were purchased from ACROS Organics. Standard reagents and solvents were purified according to known procedures.

## 2. Preparation of Ligands:

Ligands **I–VI** were synthesized by known method.<sup>1</sup>

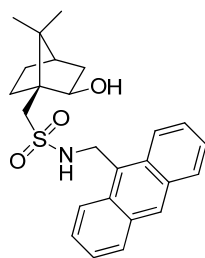

**N-(anthracen-9-ylmethyl)-1-((1S,2R,4R)-2-hydroxy-7,7-dimethylbicyclo[2.2.1]heptan-1-yl)methanesulfonamide (IV):** mp 167-169 °C;  $[\alpha]_D^{20}$  -34.5 (*c* 1.0, CH<sub>2</sub>Cl<sub>2</sub>); <sup>1</sup>H-NMR (CDCl<sub>3</sub>, 400 MHz) δ 8.44 (1H, s), 8.29 (2H, d, *J* = 8.9 Hz), 8.00 (2H, d, *J* = 8.4 Hz), 7.60-7.56 (2H, m), 7.50-7.46 (2H, m), 5.29 (2H, d, *J* = 5.6 Hz), 4.95 (1H, t, *J* = 5.5 Hz), 3.98-3.94 (1H, m), 3.14 (2H, dd, *J* = 26.3 Hz, 8.7 Hz), 2.61 (1H, d, *J* = 13.7 Hz), 1.69-1.53 (5H, m), 1.02-0.95 (2H, m), 0.77 (3H, s), 0.47 (3H, s); <sup>13</sup>C-NMR (CDCl<sub>3</sub>, 100 MHz) δ 131.5, 130.1, 129.4, 128.7, 127.1, 125.3, 123.4, 76.3, 52.9, 50.3, 48.5, 44.3, 39.4, 38.9, 30.3, 27.3, 20.2, 19.6; MS(ESI) *m/z* 446.2 (M+Na)<sup>+</sup>; IR (neat) ν 3459, 3160, 3048, 2955, 2933, 2881, 1453, 1317, 1137, 1075, 1022, 878, 738, 568 cm<sup>-1</sup>.

### 3. General procedure for the enantioselective addition of terminal 1,3-Diynes to aromatic ketones:

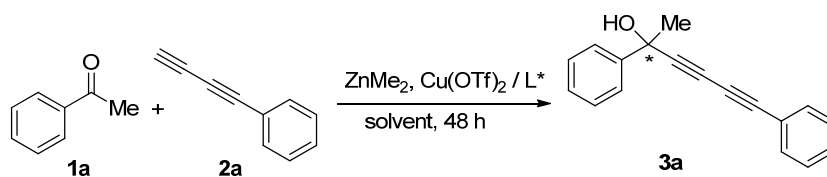

A CH<sub>2</sub>Cl<sub>2</sub> solution (1.0 mL) of sulfonamide ligand **III** (7.46 mg, 0.02 mmol) and copper(II) triflate (7.22 mg, 0.02 mmol) was stirred at room temperature for 30 min to prepare the copper complex. Buta-1,3-diynylbenzene (65.5 mg, 0.52 mmol) and a 1.2M solution of dimethylzinc in toluene (0.5 mL, 0.6 mmol) were added to a dry flask at 0 °C under Ar<sub>2</sub> with stirring for 30 min. The copper complex was added to the flask containing ZnMe<sub>2</sub> and buta-1,3-diynylbenzene *via* a syringe and the homogeneous solution was stirred at 10 °C for 30 min, then acetophenone (23.5 μL, 0.2 mmol) was added. The mixture was allowed to stir at 10 °C for 48 h. The reaction

was quenched with 5% HCl solution. The product was extracted with ether (5 mL×3) washed with brine and dried over Na<sub>2</sub>SO<sub>4</sub>. The compound was purified *via* flash chromatography (silica gel) using 5% ethyl acetate in petroleum ether as eluent. The enantiomeric excess was determined by HPLC analysis on a Chiralcel OD-H IA or IB column.

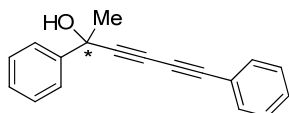

**2,6-Diphenylhexa-3,5-diyne-2-ol (3a):** 94% yield, 77% ee;  $[\alpha]_D^{20} +9.9$  (*c* 1.0, CH<sub>2</sub>Cl<sub>2</sub>); <sup>1</sup>H-NMR (CDCl<sub>3</sub>, 400 MHz)  $\delta$  7.65 (2H, d, *J* = 7.7 Hz), 7.49 (2H, d, *J* = 7.4 Hz), 7.39-7.31 (6H, m), 3.06 (1H, br s), 1.82 (3H, s); <sup>13</sup>C-NMR (CDCl<sub>3</sub>, 100 MHz)  $\delta$  144.8, 132.6, 129.4, 128.5, 128.0, 124.9, 121.5, 85.5, 79.4, 73.3, 70.5, 69.6, 33.0; MS(EI) *m/z* 245.5; IR (neat)  $\nu$  3398, 3060, 3030, 2963, 2929, 2235, 1598, 1446, 1261, 1158, 1094, 1067, 1024, 800, 758, 694 cm<sup>-1</sup>; HPLC (DAICEL Chiralpak OD-H, Hexane / *i*-PrOH = 90 / 10, 0.8 mL / min, 254 nm) *t<sub>R</sub>* (major) = 12.5 min, *t<sub>R</sub>* (minor) = 18.7 min.

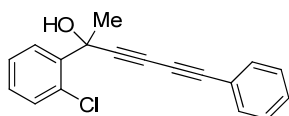

**2-(2-Chlorophenyl)-6-phenylhexa-3,5-diyne-2-ol (3b):** 92% yield, 90% ee;  $[\alpha]_D^{20} +5.8$  (*c* 1.0, CH<sub>2</sub>Cl<sub>2</sub>); <sup>1</sup>H-NMR (CDCl<sub>3</sub>, 400 MHz)  $\delta$  7.74 (1H, d, *J* = 7.5 Hz), 7.48 (2H, d, *J* = 7.7 Hz), 7.42 (1H, d, *J* = 7.6 Hz), 7.36-7.29 (5H, m), 3.14 (1H, s), 1.99 (3H, s); <sup>13</sup>C-NMR (CDCl<sub>3</sub>, 100 MHz)  $\delta$  140.4, 132.6, 131.9, 131.4, 129.3, 128.4, 127.0, 126.6, 121.5, 84.1, 79.6, 73.3, 69.4, 69.3, 29.4; MS(EI) *m/z* 279.6 ; IR (neat)  $\nu$  3445, 3063, 2960, 2918, 2849, 2235, 1434, 1264, 1037, 755, 688 cm<sup>-1</sup>; HPLC (DAICEL Chiralpak IB, Hexane / *i*-PrOH = 95 / 5, 1.0 mL / min, 254 nm) *t<sub>R</sub>* (major) = 10.7 min, *t<sub>R</sub>* (minor) = 15.8 min.

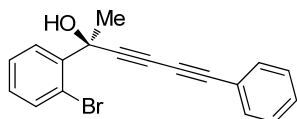

**(S)-2-(2-bromophenyl)-6-phenylhexa-3,5-diyne-2-ol (3c):** 91% yield, 90% ee;  $[\alpha]_D^{20}$

+3.6 (*c* 1.0, CH<sub>2</sub>Cl<sub>2</sub>); <sup>1</sup>H-NMR (CDCl<sub>3</sub>, 400 MHz) δ 7.76 (1H, d, *J* = 7.7 Hz), 7.63 (1H, d, *J* = 7.8 Hz), 7.48 (2H, d, *J* = 7.2 Hz), 7.36-7.29 (4H, m), 7.18 (1H, t, *J* = 7.5 Hz), 3.22 (1H, s), 2.01 (3H, s); <sup>13</sup>C-NMR (CDCl<sub>3</sub>, 100 MHz) δ 141.7, 134.9, 132.6, 129.5, 129.3, 128.4, 127.6, 126.9, 121.5, 121.1, 84.0, 79.6, 73.3, 70.2, 69.9, 29.5; MS(EI) *m/z* 323.7; IR (neat) ν 3401, 3061, 2962, 2929, 2235, 1489, 1443, 1260, 1093, 1027, 799, 755, 688 cm<sup>-1</sup>; HPLC (DAICEL Chiralpak IB, Hexane / *i*-PrOH = 85 / 15, 1.0 mL / min, 254 nm) *t<sub>R</sub>* (major) = 5.9 min, *t<sub>R</sub>* (minor) = 7.5 min.

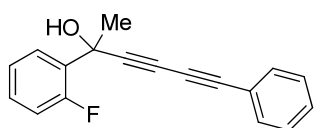

**2-(2-Fluorophenyl)-6-phenylhexa-3,5-diyne-2-ol (3d):** 88% yield, 79% ee; [ $\alpha$ ]<sub>D</sub><sup>20</sup> +7.4 (*c* 1.0, CH<sub>2</sub>Cl<sub>2</sub>); <sup>1</sup>H-NMR (CDCl<sub>3</sub>, 400 MHz) δ 7.65 (1H, t, *J* = 7.9 Hz), 7.48 (2H, d, *J* = 7.2 Hz), 7.36-7.30 (4H, m), 7.16 (1H, t, *J* = 7.6 Hz), 7.09 (1H, dd, *J* = 11.5 Hz, 8.4 Hz), 2.77 (1H, s), 1.94 (3H, s). <sup>13</sup>C-NMR (CDCl<sub>3</sub>, 100 MHz) δ 160.1 (d, <sup>1</sup>*J*<sub>F-C</sub> = 246.5 Hz), 132.6, 131.1 (d, <sup>3</sup>*J*<sub>F-C</sub> = 10.5 Hz), 129.9 (d, <sup>3</sup>*J*<sub>F-C</sub> = 8.6 Hz), 129.3, 128.4, 126.6 (d, <sup>2</sup>*J*<sub>F-C</sub> = 22.1 Hz), 124.1 (d, <sup>4</sup>*J*<sub>F-C</sub> = 3.4 Hz), 116.4 (d, <sup>2</sup>*J*<sub>F-C</sub> = 22.1 Hz), 84.1, 79.6, 73.1, 69.0, 68.0, 30.2; <sup>19</sup>F-NMR (CDCl<sub>3</sub>, 376 MHz) δ -112.8 (1F, s); MS(EI) *m/z* 263.7; IR (neat) ν 3391, 3062, 2987, 2935, 2869, 2238, 1584, 1486, 1443, 1224, 1078, 754, 688 cm<sup>-1</sup>; HPLC (DAICEL Chiralpak IB, Hexane / *i*-PrOH = 95 / 5, 1.0 mL / min, 254 nm) *t<sub>R</sub>* (major) = 11.3 min, *t<sub>R</sub>* (minor) = 15.4 min.

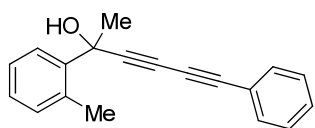

**6-Phenyl-2-(*o*-tolyl)hexa-3,5-diyne-2-ol (3e):** 60% yield, 71% ee; [ $\alpha$ ]<sub>D</sub><sup>20</sup> +3.2 (*c* 1.0, CH<sub>2</sub>Cl<sub>2</sub>); <sup>1</sup>H-NMR (CDCl<sub>3</sub>, 400 MHz) δ 7.68-7.66 (1H, m), 7.48 (2H, d, *J* = 6.9 Hz), 7.35-7.29 (3H, m), 7.24-7.20 (3H, m), 2.83 (1H, s), 2.65 (3H, s), 1.90 (3H, s); <sup>13</sup>C-NMR (CDCl<sub>3</sub>, 100 MHz) δ 141.3, 135.8, 132.6, 132.4, 129.3, 128.4, 128.0, 125.9, 121.6, 85.5, 79.5, 73.3, 70.2, 69.5, 30.7, 21.2; MS(EI) *m/z* 259.7; IR (neat) ν 3397, 3062, 3018, 2985, 2931, 2235, 1488, 1442, 1159, 1079, 1058, 912, 755, 726, 688 cm<sup>-1</sup>; HPLC (DAICEL Chiralpak IB, Hexane / *i*-PrOH = 80 / 20, 1.0 mL / min, 254 nm) *t<sub>R</sub>*

(major) = 9.1 min,  $t_R$  (minor) = 12.7 min.

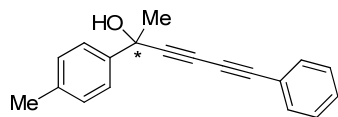

**6-Phenyl-2-(p-tolyl)hexa-3,5-diyne-2-ol (3f):** 67% yield, 71% ee;  $[\alpha]_D^{20} +11.7$  ( $c$  1.0,  $\text{CH}_2\text{Cl}_2$ );  $^1\text{H-NMR}$  ( $\text{CDCl}_3$ , 400 MHz)  $\delta$  7.54 (2H, d,  $J = 7.7$  Hz), 7.49 (2H, d,  $J = 7.2$  Hz), 7.36-7.29 (3H, m), 7.18 (2H, d,  $J = 7.7$  Hz), 2.67 (1H, s), 2.35 (3H, s), 1.82 (3H, s);  $^{13}\text{C-NMR}$  ( $\text{CDCl}_3$ , 100 MHz)  $\delta$  142.0, 137.7, 132.6, 129.3, 129.1, 128.4, 124.9, 121.6, 85.8, 79.2, 73.4, 70.3, 69.3, 32.9, 21.1; MS(EI)  $m/z$  259.8; IR (neat)  $\nu$  3382, 3056, 3028, 2983, 2927, 2869, 2236, 1596, 1442, 1158, 1091, 917, 818, 755, 688, 578,  $526\text{ cm}^{-1}$ ; HPLC (DAICEL Chiralpak OD-H, Hexane / *i*-PrOH = 95 / 5, 0.8 mL / min, 254 nm)  $t_R$  (major) = 20.2 min,  $t_R$  (minor) = 31.4 min.

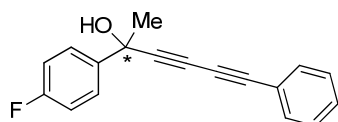

**2-(4-Fluorophenyl)-6-phenylhexa-3,5-diyne-2-ol (3g):** 83% yield, 71% ee;  $[\alpha]_D^{20} +17.8$  ( $c$  1.0,  $\text{CH}_2\text{Cl}_2$ );  $^1\text{H-NMR}$  ( $\text{CDCl}_3$ , 400 MHz)  $\delta$  7.65-7.62 (2H, m), 7.50 (2H, d,  $J = 6.9$  Hz), 7.36-7.31 (3H, m), 7.06 (2H, t,  $J = 8.6$  Hz), 2.41 (1H, s), 1.82 (3H, s);  $^{13}\text{C-NMR}$  ( $\text{CDCl}_3$ , 100 MHz)  $\delta$  159.8 (d,  $^1J_{\text{F-C}} = 236.5$  Hz), 140.5 (d,  $^4J_{\text{F-C}} = 3.4$  Hz), 132.6, 129.4, 128.5, 126.8 (d,  $^3J_{\text{F-C}} = 8.1$  Hz), 121.4, 115.2 (d,  $^2J_{\text{F-C}} = 22.1$  Hz), 84.8, 79.7, 73.0, 70.1, 69.9, 33.1;  $^{19}\text{F-NMR}$  ( $\text{CDCl}_3$ , 376 MHz)  $\delta$  -114.6 (1F, s); MS(EI)  $m/z$  263.7; IR (neat)  $\nu$  3380, 3063, 2986, 2929, 2856, 2237, 1602, 1506, 1226, 1159, 1087, 836, 755, 688, 575,  $525\text{ cm}^{-1}$ ; HPLC (DAICEL Chiralpak IB, Hexane / *i*-PrOH = 95 / 5, 1.0 mL / min, 254 nm)  $t_R$  (major) = 12.0 min,  $t_R$  (minor) = 16.2 min.

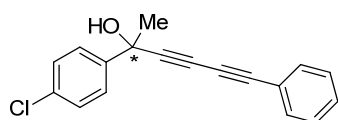

**2-(4-Chlorophenyl)-6-phenylhexa-3,5-diyne-2-ol (3h):** 86% yield, 72% ee;  $[\alpha]_D^{20} +11.7$  ( $c$  1.0,  $\text{CH}_2\text{Cl}_2$ );  $^1\text{H-NMR}$  ( $\text{CDCl}_3$ , 400 MHz)  $\delta$  7.59 (2H, d,  $J = 8.4$  Hz), 7.50 (2H, d,  $J = 7.1$  Hz), 7.38-7.31 (5H, m), 2.42 (1H, s), 1.81 (3H, s);  $^{13}\text{C-NMR}$  ( $\text{CDCl}_3$ ,

100 MHz)  $\delta$  143.2, 133.9, 132.6, 129.5, 128.6, 128.5, 126.4, 121.3, 84.6, 79.8, 72.9, 70.1, 70.0, 33.0; MS(EI)  $m/z$  279.8; IR (neat)  $\nu$  3552, 3357, 3296, 3057, 2984, 2929, 2856, 2236, 1489, 1092, 1013, 829, 755, 688  $\text{cm}^{-1}$ ; HPLC (DAICEL Chiralpak IB, Hexane / *i*-PrOH = 95 / 5, 1.0 mL / min, 254 nm)  $t_R$  (major) = 16.7 min,  $t_R$  (minor) = 18.1 min.

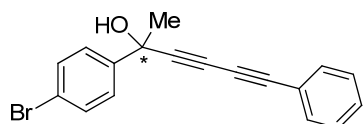

**2-(4-Bromophenyl)-6-phenylhexa-3,5-diyne-2-ol (3i):** 80% yield, 65% ee;  $[\alpha]_D^{20} +20.2$  (*c* 1.0,  $\text{CH}_2\text{Cl}_2$ );  $^1\text{H-NMR}$  ( $\text{CDCl}_3$ , 400 MHz)  $\delta$  7.54-7.49 (6H, m), 7.38-7.31 (3H, m), 2.45 (1H, s), 1.81 (3H, s);  $^{13}\text{C-NMR}$  ( $\text{CDCl}_3$ , 100 MHz)  $\delta$  143.8, 132.6, 131.5, 129.5, 128.5, 126.8, 122.0, 121.3, 84.5, 79.8, 72.9, 70.2, 70.0, 33.0; MS(EI)  $m/z$  324.4; IR (neat)  $\nu$  3331, 3059, 2985, 2926, 2850, 2235, 1590, 1486, 1087, 1009, 823, 754, 688  $\text{cm}^{-1}$ ; HPLC (DAICEL Chiralpak IB, Hexane / *i*-PrOH = 80 / 20, 0.8 mL / min, 254 nm)  $t_R$  (major) = 7.2 min,  $t_R$  (minor) = 8.1 min.

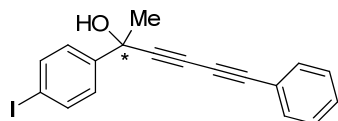

**2-(4-Iodophenyl)-6-phenylhexa-3,5-diyne-2-ol (3j):** 95% yield, 81% ee;  $[\alpha]_D^{20} +10.5$  (*c* 1.0,  $\text{CH}_2\text{Cl}_2$ );  $^1\text{H-NMR}$  ( $\text{CDCl}_3$ , 400 MHz)  $\delta$  7.71 (2H, d,  $J = 8.6$  Hz), 7.50 (2H, d,  $J = 6.7$  Hz), 7.41-7.31 (5H, m), 2.43 (1H, s), 1.80 (3H, s);  $^{13}\text{C-NMR}$  ( $\text{CDCl}_3$ , 100 MHz)  $\delta$  144.5, 137.5, 132.6, 129.4, 128.5, 127.0, 121.3, 93.6, 84.5, 79.8, 72.9, 70.2, 70.0, 32.9; MS(ESI)  $m/z$  355.0 (M-OH) $^+$ ; IR (neat)  $\nu$  3411, 3054, 2985, 2918, 2849, 2235, 1484, 1391, 1264, 1087, 1005, 820, 754, 739, 688  $\text{cm}^{-1}$ ; HPLC (DAICEL Chiralpak OD-H, Hexane / *i*-PrOH = 80 / 20, 0.8 mL / min, 254 nm)  $t_R$  (major) = 11.5 min,  $t_R$  (minor) = 24.0 min.

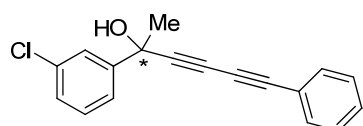

**2-(3-Chlorophenyl)-6-phenylhexa-3,5-diyne-2-ol (3k):** 92% yield, 70% ee;  $[\alpha]_D^{20} +9.0$  (*c* 1.0,  $\text{CH}_2\text{Cl}_2$ );  $^1\text{H-NMR}$  ( $\text{CDCl}_3$ , 400 MHz)  $\delta$  7.65 (1H, s), 7.53 (1H, d,  $J = 7.0$

Hz), 7.50 (2H, d,  $J = 7.1$  Hz), 7.37-7.28 (5H, m), 3.68 (1H, br s), 1.81 (3H, s);  $^{13}\text{C}$ -NMR ( $\text{CDCl}_3$ , 100 MHz)  $\delta$  147.0, 134.4, 132.6, 129.7, 129.4, 128.5, 128.0, 125.3, 123.2, 121.4, 84.8, 79.6, 73.1, 69.9, 69.8, 33.1; MS(EI)  $m/z$  279.9; IR (neat)  $\nu$  3295, 3060, 2918, 2849, 2236, 1433, 1264, 1037, 755, 688  $\text{cm}^{-1}$ ; HPLC (DAICEL Chiralpak IB, Hexane / *i*-PrOH = 70 / 30, 0.8 mL / min, 254 nm)  $t_R$  (major) = 5.1 min,  $t_R$  (minor) = 6.0 min.

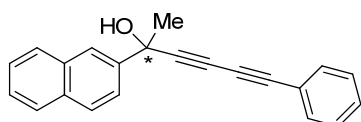

**2-(Naphthalen-2-yl)-6-phenylhexa-3,5-diyne-2-ol (3l):** 71% yield, 68% ee;  $[\alpha]_D^{20} +2.5$  ( $c$  1.0,  $\text{CH}_2\text{Cl}_2$ );  $^1\text{H}$ -NMR ( $\text{CDCl}_3$ , 400 MHz)  $\delta$  8.12 (1H, s), 7.90-7.83 (3H, m), 7.74 (1H, d,  $J = 8.6$  Hz), 7.52-7.49 (4H, m), 7.38-7.31 (3H, m), 2.58 (1H, s), 1.92 (3H, s);  $^{13}\text{C}$ -NMR ( $\text{CDCl}_3$ , 100 MHz)  $\delta$  141.9, 133.1, 133.0, 132.6, 129.4, 128.5, 128.4, 128.4, 127.6, 126.4, 126.3, 123.5, 123.2, 121.5, 85.2, 79.6, 73.2, 70.7, 69.9, 32.8; MS(ESI)  $m/z$  279.1 ( $\text{M-OH}^+$ ); IR (neat)  $\nu$  3538, 3384, 3057, 2984, 2928, 2859, 2236, 1598, 1489, 1442, 1187, 1127, 1084, 858, 818, 752, 688, 526, 477  $\text{cm}^{-1}$ ; HPLC (DAICEL Chiralpak IB, Hexane / *i*-PrOH = 80 / 20, 1.0 mL / min, 254 nm)  $t_R$  (minor) = 7.7 min,  $t_R$  (major) = 21.1 min.

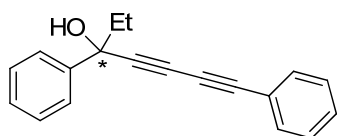

**3,7-Diphenylhepta-4,6-diyne-3-ol (3m):** 91% yield, 62% ee;  $[\alpha]_D^{20} +11.0$  ( $c$  1.0,  $\text{CH}_2\text{Cl}_2$ );  $^1\text{H}$ -NMR ( $\text{CDCl}_3$ , 400 MHz)  $\delta$  7.62 (1H, d,  $J = 7.4$  Hz), 7.51 (1H, d,  $J = 7.0$  Hz), 7.39-7.31 (6H, m), 2.08-1.95 (2H, m), 0.99 (3H, t,  $J = 7.3$  Hz);  $^{13}\text{C}$ -NMR ( $\text{CDCl}_3$ , 100 MHz)  $\delta$  143.7, 132.6, 129.4, 128.5, 128.3, 127.9, 125.5, 121.5, 84.6, 79.0, 74.5, 73.3, 70.6, 38.3, 9.1; MS(EI)  $m/z$  259.6; IR (neat)  $\nu$  3396, 3061, 3030, 2964, 2928, 2235, 1446, 1261, 1094, 1067, 1024, 800, 758, 694  $\text{cm}^{-1}$ ; HPLC (DAICEL Chiralpak IB, Hexane / *i*-PrOH = 80 / 20, 1.0 mL / min, 254 nm)  $t_R$  (major) = 4.3 min,  $t_R$  (minor) = 4.7 min.



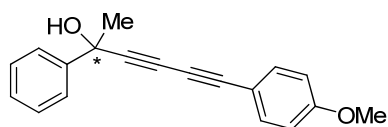

**6-(4-Methoxyphenyl)-2-phenylhexa-3,5-diyne-2-ol (3n):** 90% yield, 80% ee;  $[\alpha]_D^{20} +22.4$  (*c* 1.0, CH<sub>2</sub>Cl<sub>2</sub>); <sup>1</sup>H-NMR (CDCl<sub>3</sub>, 400 MHz)  $\delta$  7.66 (2H, d, *J* = 7.6 Hz), 7.44 (2H, d, *J* = 8.7 Hz), 7.38 (2H, t, *J* = 7.5 Hz), 7.31 (1H, t, *J* = 7.2 Hz), 6.84 (2H, d, *J* = 8.7 Hz), 3.81 (3H, s), 2.50 (1H, s), 1.83 (3H, s); <sup>13</sup>C-NMR (CDCl<sub>3</sub>, 100 MHz)  $\delta$  160.5, 144.8, 134.2, 128.4, 128.0, 124.9, 114.2, 113.4, 84.7, 79.9, 72.1, 70.6, 69.9, 55.3, 33.0; MS(EI) *m/z* 275.7; IR (neat)  $\nu$  3418, 3060, 2984, 2933, 2838, 2233, 1603, 1509, 1252, 1174, 1030, 831, 763, 699 cm<sup>-1</sup>; HPLC (DAICEL Chiralpak IB, Hexane / *i*-PrOH = 90 / 10, 1.0 mL / min, 254 nm) *t*<sub>R</sub> (major) = 10.2 min, *t*<sub>R</sub> (minor) = 12.2 min.

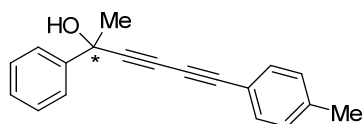

**2-Phenyl-6-(p-tolyl)hexa-3,5-diyne-2-ol (3o):** 82% yield, 70% ee;  $[\alpha]_D^{20} +17.7$  (*c* 1.0, CH<sub>2</sub>Cl<sub>2</sub>); <sup>1</sup>H-NMR (CDCl<sub>3</sub>, 400 MHz)  $\delta$  7.65 (2H, d, *J* = 7.7 Hz), 7.40-7.36 (4H, m), 7.31 (1H, t, *J* = 7.2 Hz), 7.12 (2H, d, *J* = 7.8 Hz), 2.54 (1H, s), 2.35 (3H, s), 1.83 (3H, s); <sup>13</sup>C-NMR (CDCl<sub>3</sub>, 100 MHz)  $\delta$  144.8, 139.8, 132.5, 129.2, 128.4, 128.0, 124.9, 118.4, 85.0, 79.7, 72.6, 70.6, 69.8, 33.0, 21.6; MS(EI) *m/z* 259.6; IR (neat)  $\nu$  3415, 3029, 2958, 2928, 2870, 2234, 1602, 1509, 1448, 1286, 1180, 815, 763, 699, 527 cm<sup>-1</sup>; HPLC (DAICEL Chiralpak IB, Hexane / *i*-PrOH = 80 / 20, 0.8 mL / min, 254 nm) *t*<sub>R</sub> (major) = 5.8 min, *t*<sub>R</sub> (minor) = 6.0 min.

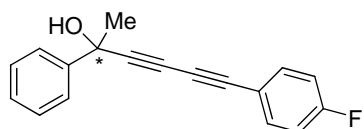

**6-(4-Fluorophenyl)-2-phenylhexa-3,5-diyne-2-ol (3p):** 77% yield, 62% ee;  $[\alpha]_D^{20} +12.1$  (*c* 1.0, CH<sub>2</sub>Cl<sub>2</sub>); <sup>1</sup>H-NMR (CDCl<sub>3</sub>, 400 MHz)  $\delta$  7.65 (2H, d, *J* = 7.3 Hz), 7.48 (2H, m), 7.38 (2H, t, *J* = 7.5 Hz), 7.30 (1H, t, *J* = 7.2 Hz), 7.02 (2H, t, *J* = 8.6 Hz), 2.91 (1H, br s), 1.83 (3H, m); <sup>13</sup>C-NMR (CDCl<sub>3</sub>, 100 MHz)  $\delta$  163.1 (d, <sup>1</sup>*J*<sub>F-C</sub> = 250.1 Hz), 145.0, 134.6 (d, <sup>3</sup>*J*<sub>F-C</sub> = 8.6 Hz), 128.4, 127.9, 124.9, 117.7 (d, <sup>4</sup>*J*<sub>F-C</sub> = 3.4 Hz),

115.9 (d,  $^2J_{F-C} = 22.1$  Hz), 85.9, 78.1, 73.2, 70.3, 69.2, 33.1;  $^{19}F$ -NMR (CDCl<sub>3</sub>, 376 MHz)  $\delta$  -108.4 (1F, s); MS(EI)  $m/z$  263.6; IR (neat)  $\nu$  3359, 3061, 3029, 2985, 2931, 2237, 1598, 1505, 1232, 1155, 835, 699, 529 cm<sup>-1</sup>; HPLC (DAICEL Chiralpak IB, Hexane / *i*-PrOH = 80 / 20, 1.0 mL / min, 254 nm)  $t_R$  (major) = 4.6 min,  $t_R$  (minor) = 5.0 min.

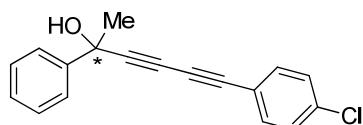

**6-(4-Chlorophenyl)-2-phenylhexa-3,5-diyne-2-ol (3q):** 79% yield, 66% ee;  $[\alpha]_D^{20} +12.6$  ( $c$  1.0, CH<sub>2</sub>Cl<sub>2</sub>);  $^1H$ -NMR (CDCl<sub>3</sub>, 400 MHz)  $\delta$  7.64 (2H, d,  $J = 7.5$  Hz), 7.42-7.36 (4H, m), 7.32-7.28 (3H, m), 2.69 (1H, s), 1.82 (3H, s);  $^{13}C$ -NMR (CDCl<sub>3</sub>, 100 MHz)  $\delta$  144.8, 139.8, 132.5, 129.2, 128.4, 128.0, 124.9, 118.4, 85.0, 79.7, 72.6, 70.6, 69.8, 33.0, 21.6; MS(EI)  $m/z$  279.6; IR (neat)  $\nu$  3554, 3375, 3060, 330, 2985, 2929, 2860, 2236, 1489, 1092, 1013, 826, 763, 699, 578, 524 cm<sup>-1</sup>; HPLC (DAICEL Chiralpak IB, Hexane / *i*-PrOH = 90 / 10, 1.0 mL / min, 254 nm)  $t_R$  (major) = 6.2 min,  $t_R$  (minor) = 7.0 min.

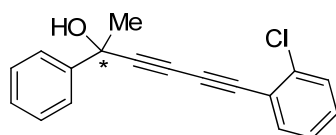

**6-(2-Chlorophenyl)-2-phenylhexa-3,5-diyne-2-ol (3r):** 85% yield, 67% ee;  $[\alpha]_D^{20} +12.1$  ( $c$  1.0, CH<sub>2</sub>Cl<sub>2</sub>);  $^1H$ -NMR (CDCl<sub>3</sub>, 400 MHz)  $\delta$  7.65 (2H, d,  $J = 6.9$  Hz), 7.52 (1H, d,  $J = 6.9$  Hz), 7.39-7.38 (3H, m), 7.33-7.26 (2H, m), 7.21 (1H, t,  $J = 6.4$  Hz), 2.61 (1H, s), 1.84 (3H, s);  $^{13}C$ -NMR (CDCl<sub>3</sub>, 100 MHz)  $\delta$  144.5, 137.0, 134.4, 130.3, 129.6, 128.5, 128.1, 126.6, 124.9, 121.7, 86.8, 78.0, 75.9, 70.6, 69.4, 32.9; MS(EI)  $m/z$  279.6; IR (neat)  $\nu$  3391, 3063, 2983, 2963, 2917, 2849, 2235, 1435, 1093, 1067, 754, 698 cm<sup>-1</sup>; HPLC (DAICEL Chiralpak IB, Hexane / *i*-PrOH = 90 / 10, 1.0 mL / min, 254 nm)  $t_R$  (major) = 6.3 min,  $t_R$  (minor) = 7.7 min.

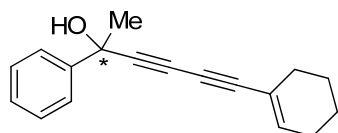

**6-(Cyclohex-1-en-1-yl)-2-phenylhexa-3,5-diyne-2-ol (3s):** 85% yield, 79% ee;  $[\alpha]_D^{20} +16.5$  (*c* 1.0,  $\text{CH}_2\text{Cl}_2$ );  $^1\text{H-NMR}$  ( $\text{CDCl}_3$ , 400 MHz)  $\delta$  7.62 (2H, d,  $J = 7.5$  Hz), 7.35 (2H, t,  $J = 7.3$  Hz), 7.29 (1H, d,  $J = 7.1$  Hz), 6.29 (1H, m), 2.94 (1H, s), 2.14-2.09 (4H, m), 1.78 (3H, s), 1.63-1.56 (4H, m);  $^{13}\text{C-NMR}$  ( $\text{CDCl}_3$ , 100 MHz)  $\delta$  144.9, 139.2, 128.4, 127.9, 124.9, 119.5, 84.4, 81.5, 70.7, 70.5, 69.9, 33.0, 28.6, 25.9, 22.1, 21.3; MS(EI)  $m/z$  249.7; IR (neat)  $\nu$  3384, 3061, 3027, 2984, 2932, 2860, 2228, 1448, 1146, 1092, 1055, 919, 763, 699, 578  $\text{cm}^{-1}$ ; HPLC (DAICEL Chiralpak IB, Hexane / *i*-PrOH = 90 / 10, 1.0 mL / min, 254 nm)  $t_R$  (major) = 5.2 min,  $t_R$  (minor) = 5.5 min.

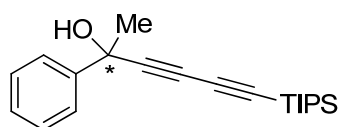

**2-Phenyl-6-(triisopropylsilyl)hexa-3,5-diyne-2-ol (3t):** 71% yield, 72% ee,  $[\alpha]_D^{20} +6.1$  (*c* 1.0,  $\text{CH}_2\text{Cl}_2$ );  $^1\text{H-NMR}$  ( $\text{CDCl}_3$ , 400 MHz)  $\delta$  7.62 (2H, d,  $J = 7.5$  Hz), 7.37 (2H, t,  $J = 7.5$  Hz), 7.30 (1H, d,  $J = 7.2$  Hz), 2.53 (1H, s), 1.79 (3H, s), 1.09 (21H, s);  $^{13}\text{C-NMR}$  ( $\text{CDCl}_3$ , 100 MHz)  $\delta$  144.6, 128.4, 128.0, 124.9, 88.9, 85.6, 79.2, 70.4, 70.2, 32.9, 18.5, 11.3; MS(EI)  $m/z$  283.1 ( $\text{M}^i\text{Pr}$ ); IR (neat)  $\nu$  3325, 2944, 2891, 2866, 2221, 2102, 1462, 1367, 1239, 1065, 921, 882, 763, 697, 678, 579  $\text{cm}^{-1}$ ; HPLC (DAICEL Chiralpak IA, Hexane / *i*-PrOH = 95 / 5, 1.0 mL / min, 254 nm)  $t_R$  (minor) = 4.7 min,  $t_R$  (major) = 5.0 min.

#### 4. A large-scale addition, Further transformation, and X-ray

##### Analysis:

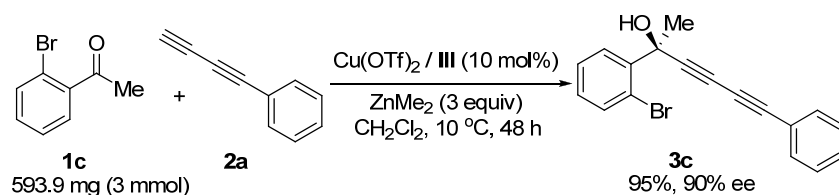

A CH<sub>2</sub>Cl<sub>2</sub> solution (15.0 mL) of sulfonamide ligand **III** (112.0 mg, 0.3 mmol) and copper(II) triflate (108.3 mg, 0.3 mmol) was stirred at room temperature for 30 min to prepare the copper complex. Buta-1,3-diynylbenzene **2a** (982.5 mg, 7.8 mmol) and a 1.2M solution of dimethylzinc in toluene (7.5 mL, 9 mmol) were added to a dry flask at 0 °C under Ar<sub>2</sub> with stirring for 30 min. The copper complex was added to the flask containing ZnMe<sub>2</sub> and buta-1,3-diynylbenzene *via* a syringe and the homogeneous solution was stirred at 10 °C for 30 min, then 1-(2-bromophenyl)ethanone **1a** (593.9 mg, 3 mmol) was added. The mixture was allowed to stir at 10 °C for 48 h. The reaction was quenched with 5% HCl solution and extracted with ether (25 mL×3). The organic layer was washed with brine and dried over Na<sub>2</sub>SO<sub>4</sub>. The crude was purified *via* flash chromatography (silica gel) using ethyl acetate in petroleum ether (0–5%, *v/v*) as eluent to recover the buta-1,3-diynylbenzene (562.3 mg, 93%) and to afford the light yellow oil **3c** (923.5 mg, 95% yield and 90% ee).

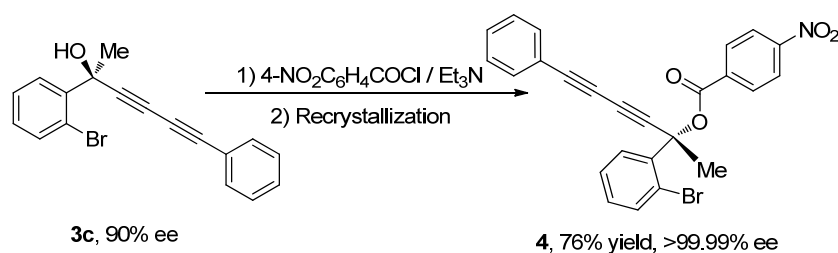

To a solution of **3c** (0.37 mmol, 120 mg) in CH<sub>2</sub>Cl<sub>2</sub> (4 mL) was directly dropped a mixture of 4-nitrobenzoyl chloride (74 mg, 0.4 mmol, 1.1 equiv) and Et<sub>3</sub>N (103 μL, 0.74 mmol, 2 equiv) in CH<sub>2</sub>Cl<sub>2</sub> (2 mL) at 0 °C, then stirring was maintained for 48 h at room temperature. The resulting mixture was poured into water and extracted with CH<sub>2</sub>Cl<sub>2</sub>. The organic extracts were dried over Na<sub>2</sub>SO<sub>4</sub> and concentrated. The residue was purified by column chromatography on silica gel to afford the product. Recrystallization of this product from CH<sub>2</sub>Cl<sub>2</sub>/hexane furnished acicular crystal.

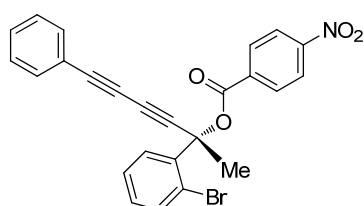

**(S)-2-(2-bromophenyl)-6-phenylhexa-3,5-diyne-2-yl 4-nitrobenzoate (4):** 133 mg, 76% yield, >99.99% ee; mp 164-165 °C;  $[\alpha]_D^{20}$  -29.7 (*c* 1.0, CH<sub>2</sub>Cl<sub>2</sub>); <sup>1</sup>H-NMR (CDCl<sub>3</sub>, 400 MHz) δ 8.30-8.25 (4H, m), 8.05 (1H, d, *J* = 7.9 Hz), 7.59 (1H, d, *J* = 7.9 Hz), 7.51 (2H, d, *J* = 6.8 Hz), 7.43-7.32 (4H, m), 7.20 (1H, t, *J* = 7.6 Hz), 2.30 (3H, s); <sup>13</sup>C-NMR (CDCl<sub>3</sub>, 100 MHz) δ 162.2, 150.7, 138.1, 135.6, 135.3, 132.6, 131.2, 130.0, 129.6, 128.5, 127.6, 123.5, 121.2, 119.3, 80.8, 79.8, 78.3, 73.3, 72.9, 28.5; MS(ESI) *m/z* 473.0 (M)<sup>+</sup>; IR (neat) ν 3442, 2918, 2850, 2242, 1729, 1523, 1348, 1266, 1091, 1055, 841, 762, 719 cm<sup>-1</sup>.

## 5. References

- 1 (a) D. J. Ramón, M. Yus, *Tetrahedron*, 1998, **54**, 5651–5666; (b) D. J. Ramón, M. Yus, *Chem. Eur. J.*, 2006, **12**, 4431–4445.
- 2 X.-W. Jiang, M. Rawat, W. D. Wulff, *J. Am. Chem. Soc.*, 2004, **126**, 5970–5971.

## 6. NMR Spectra and HPLC Charts for the Addition Adducts:

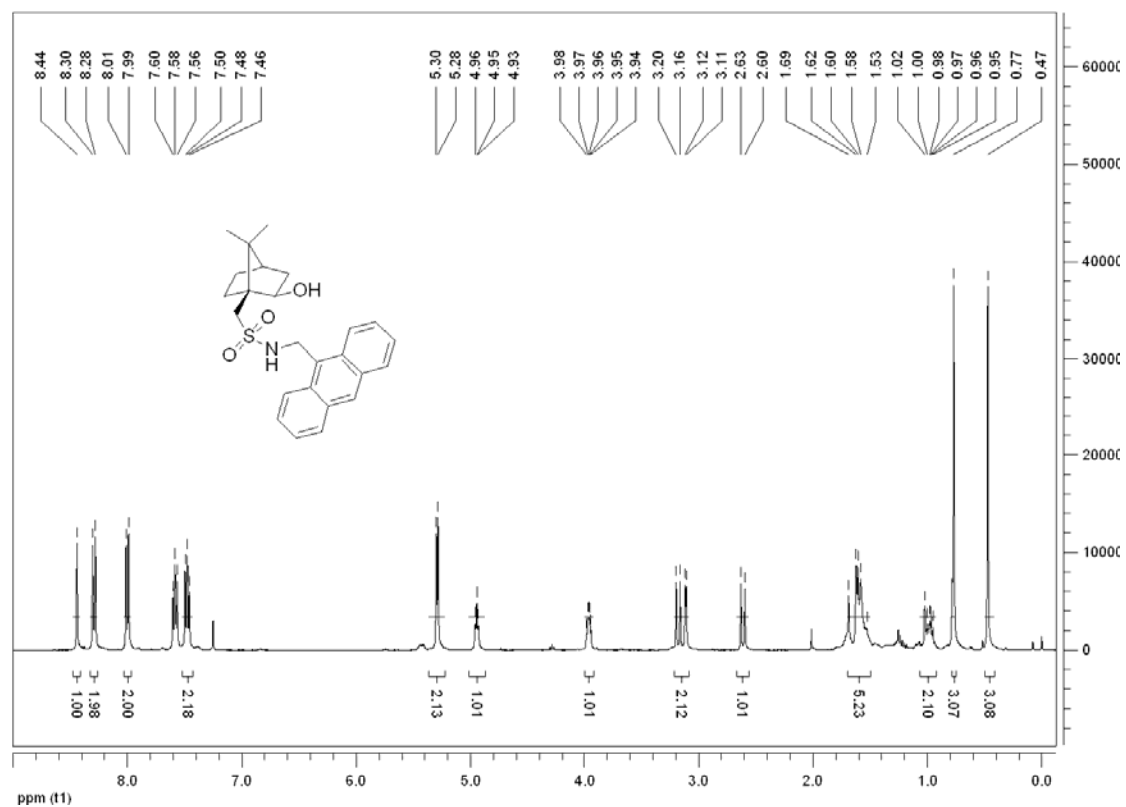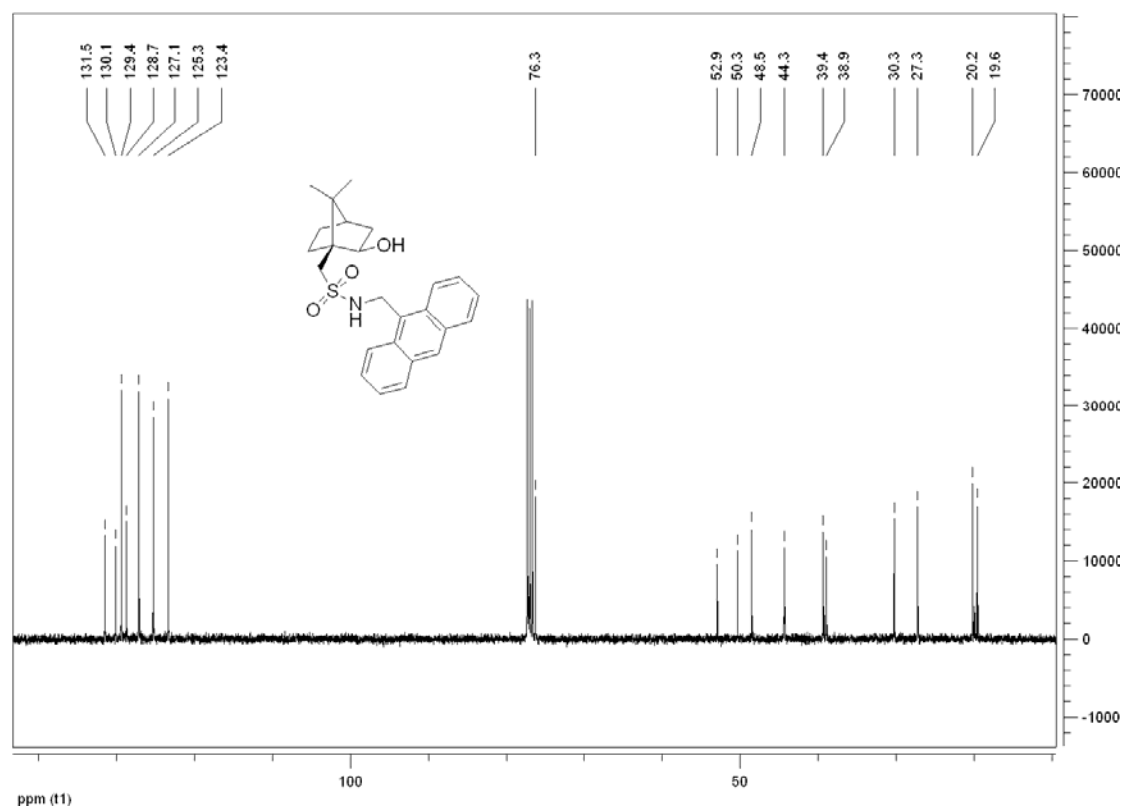

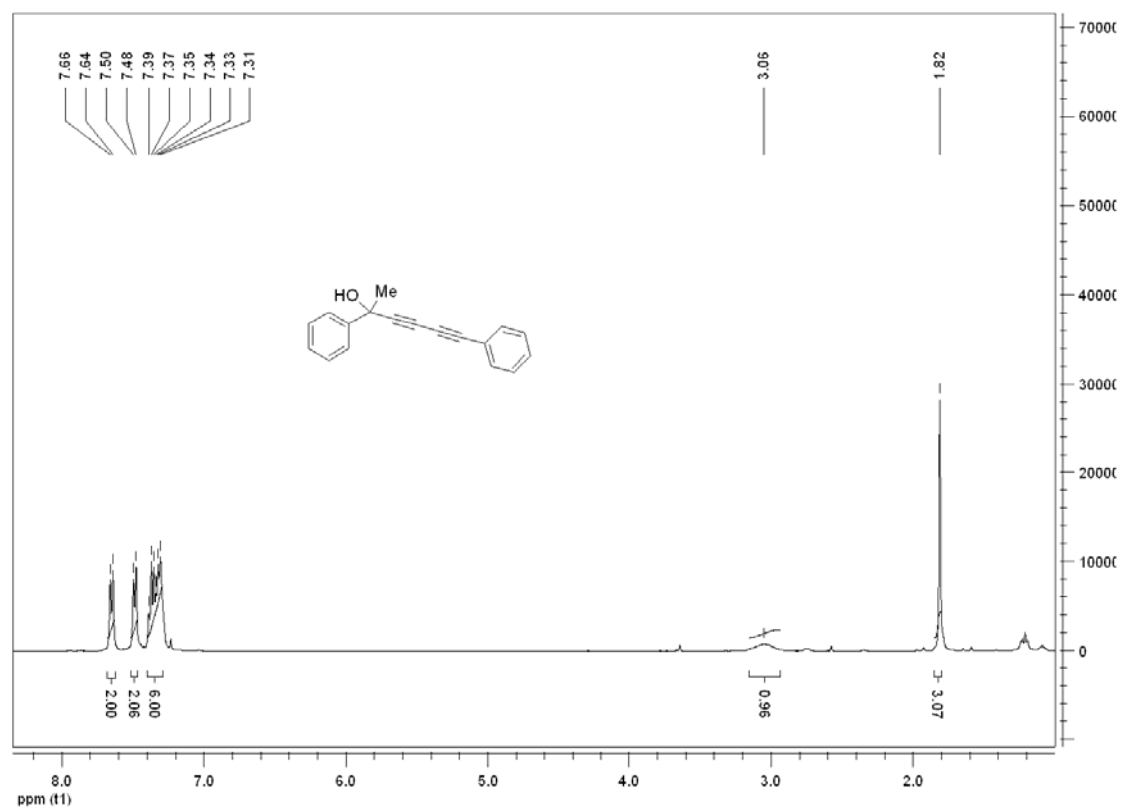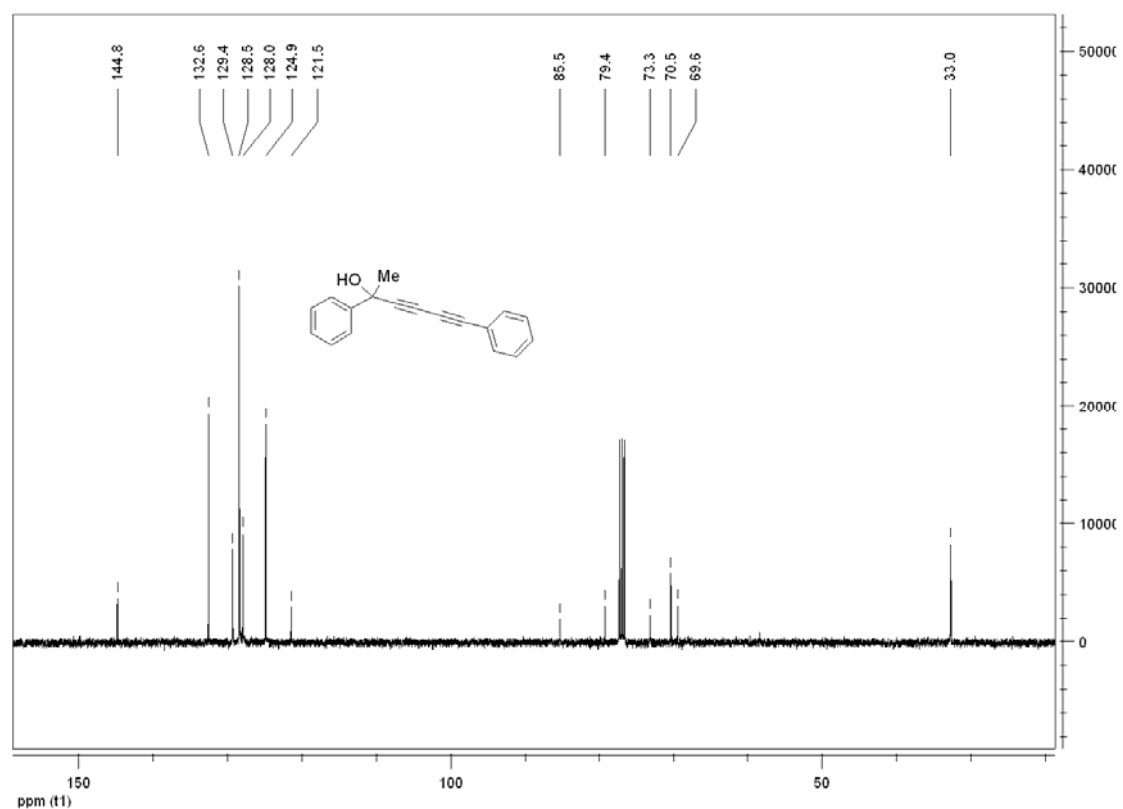

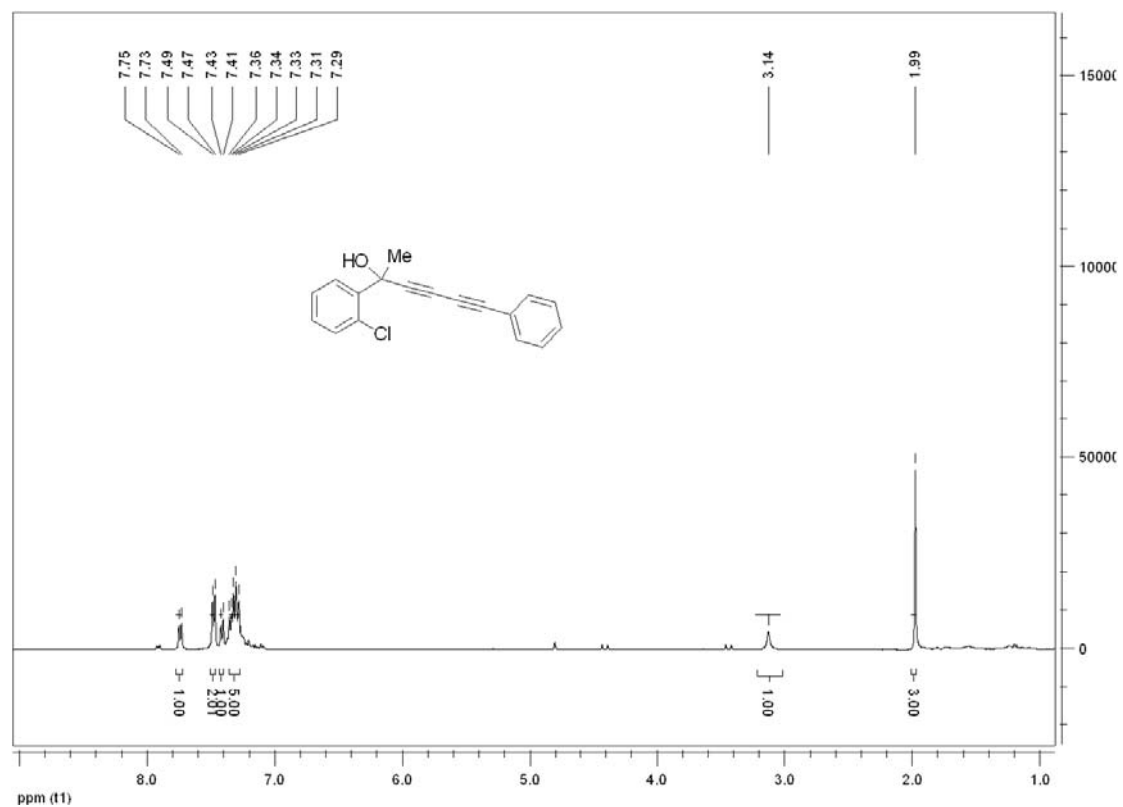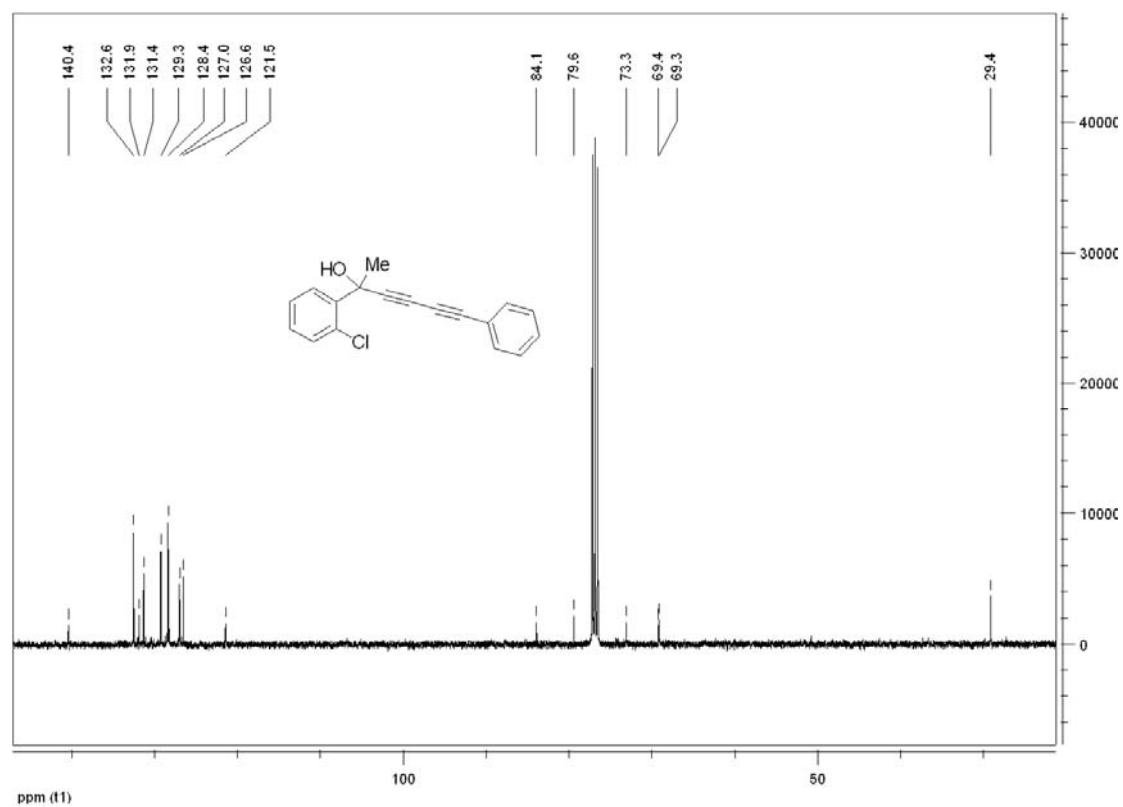



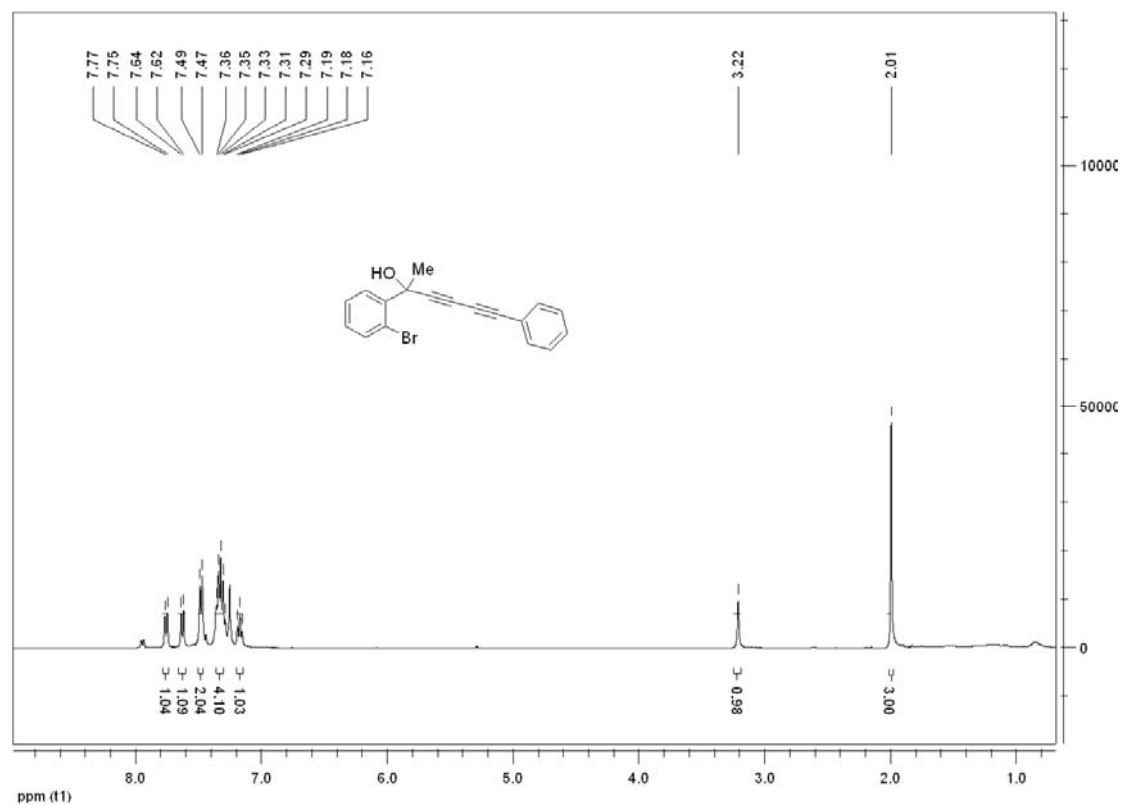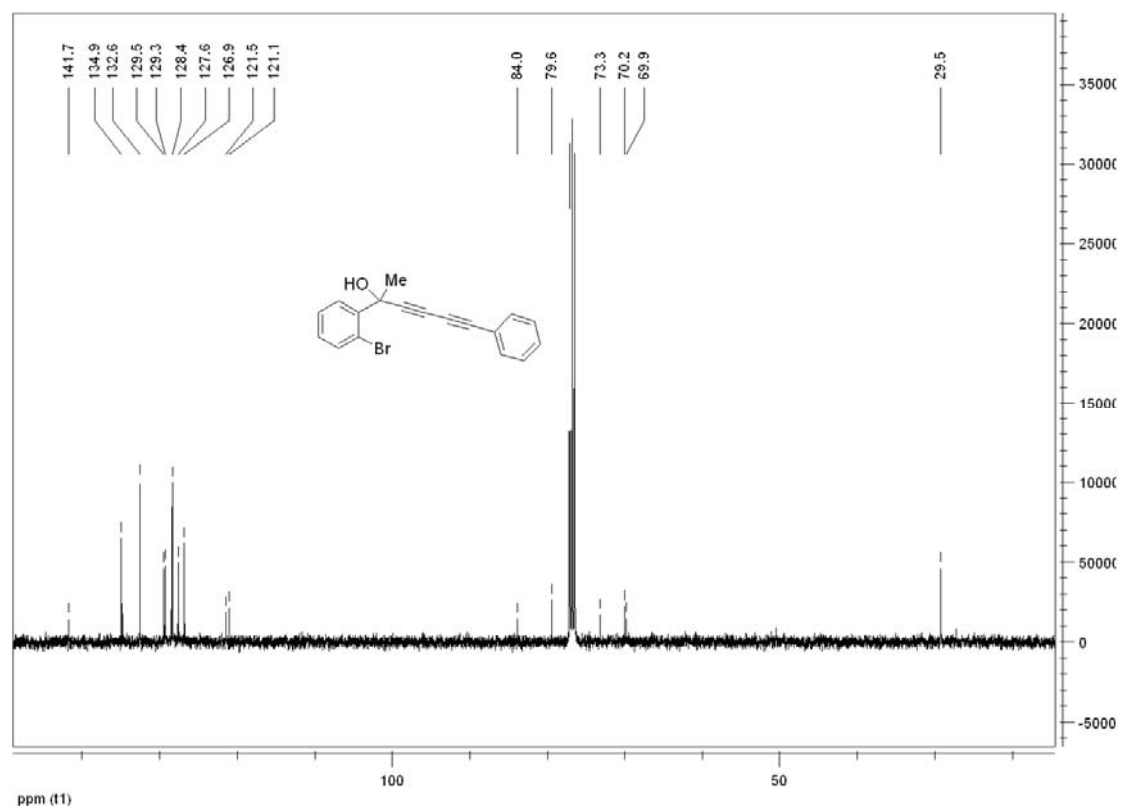



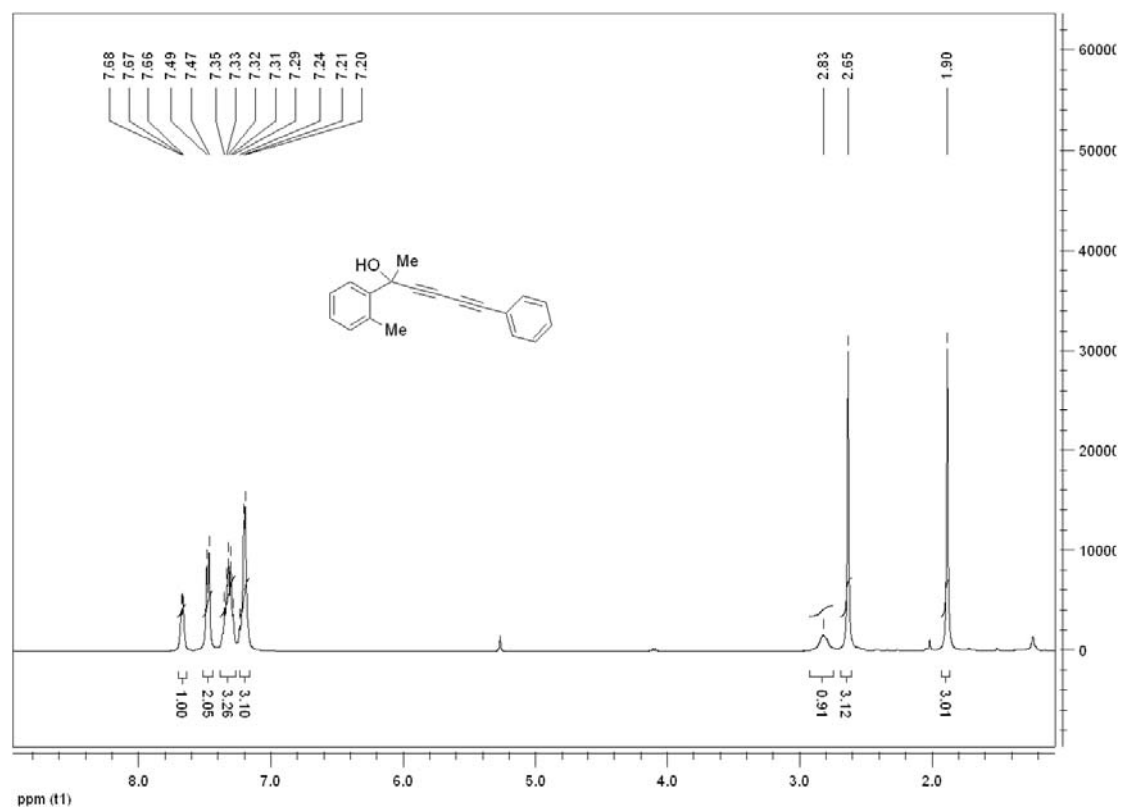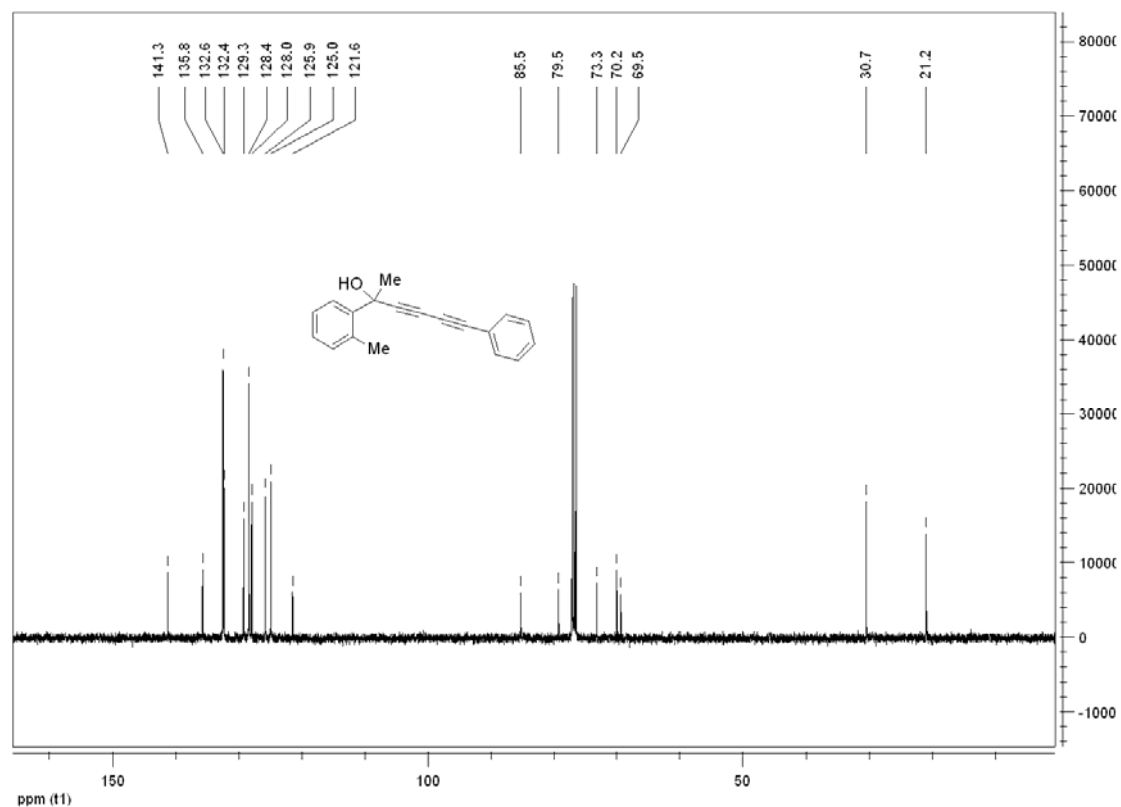

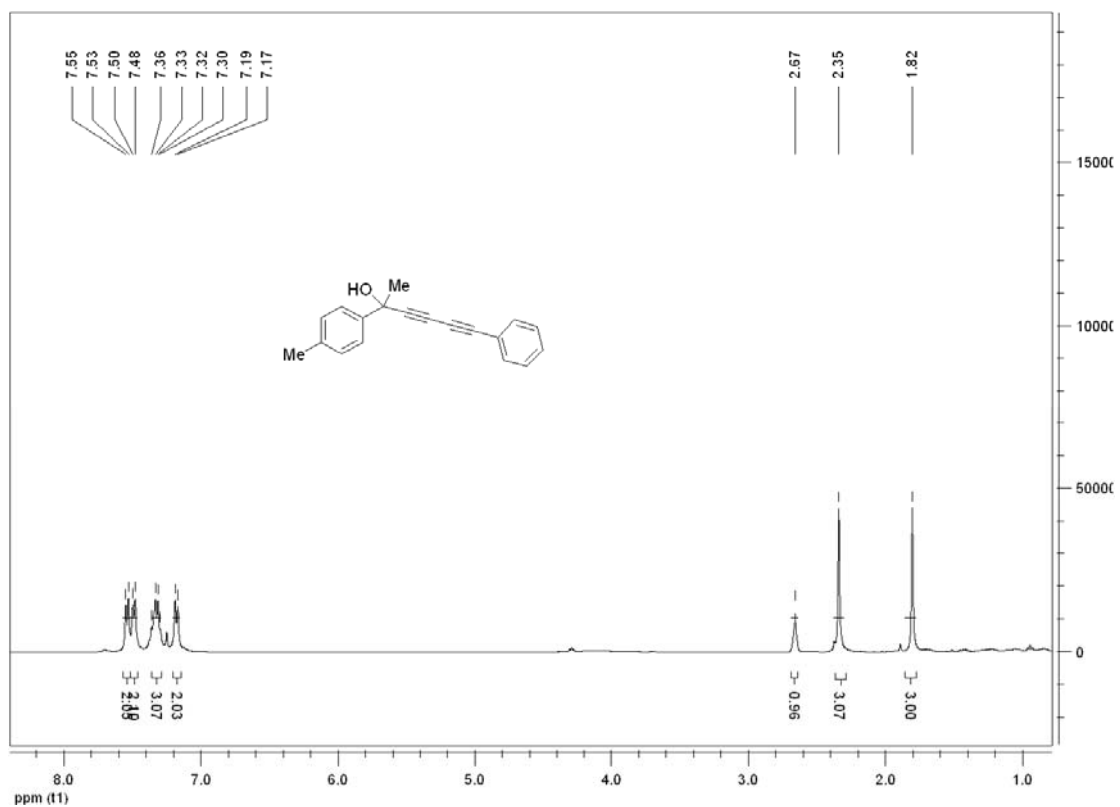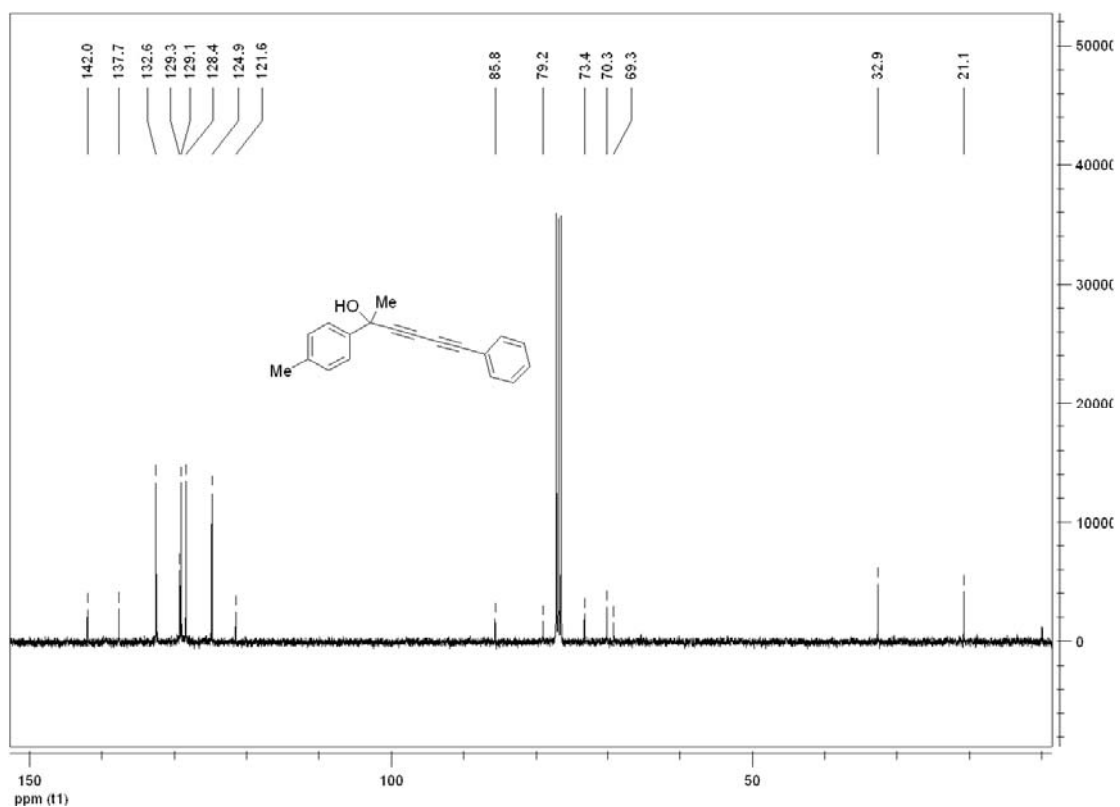

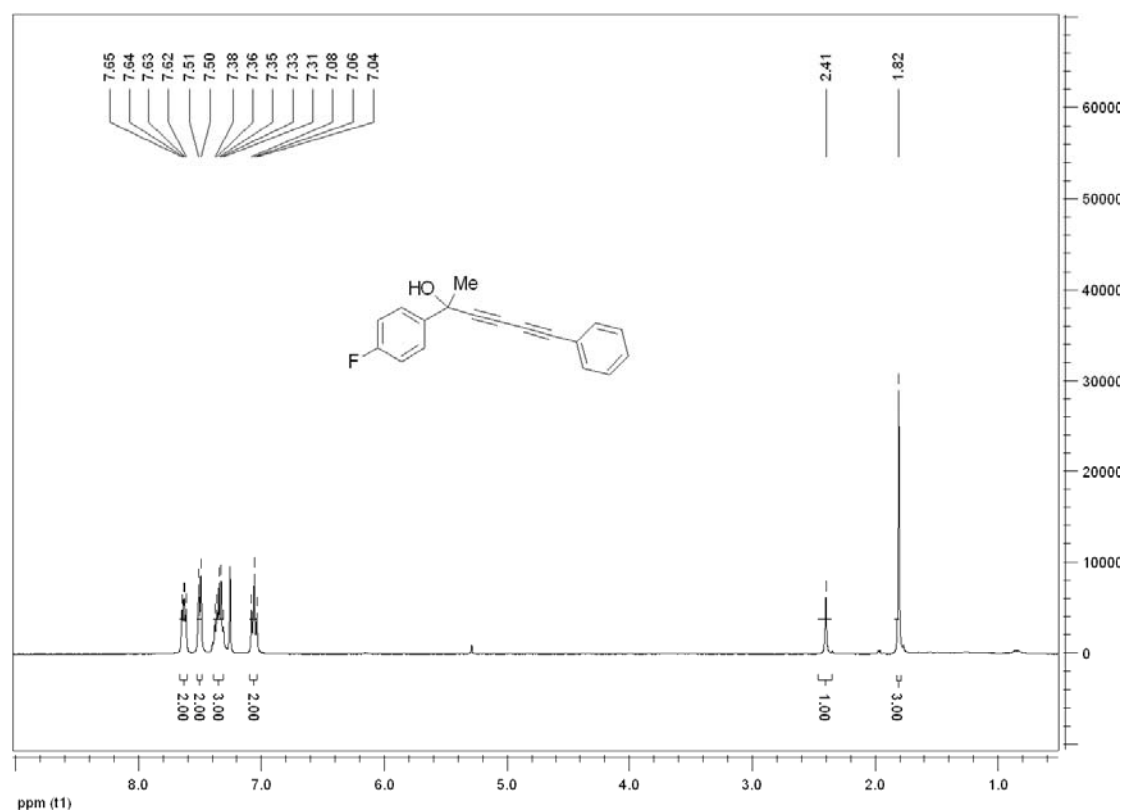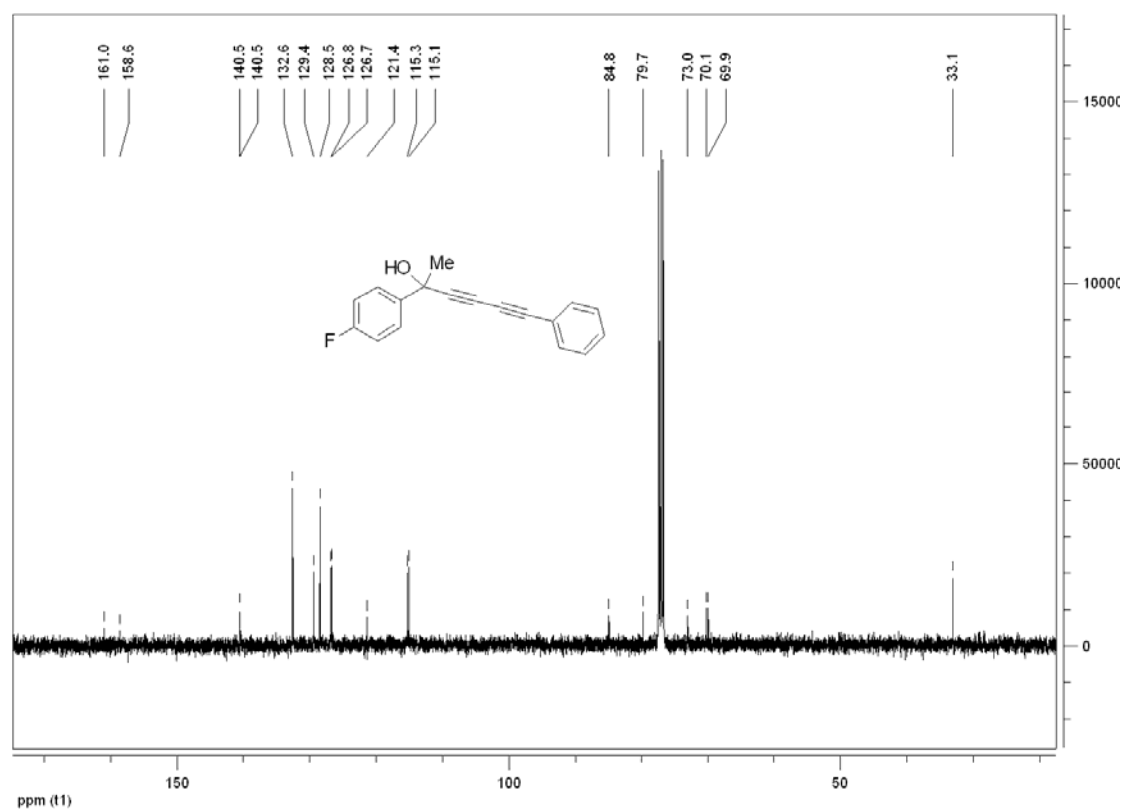

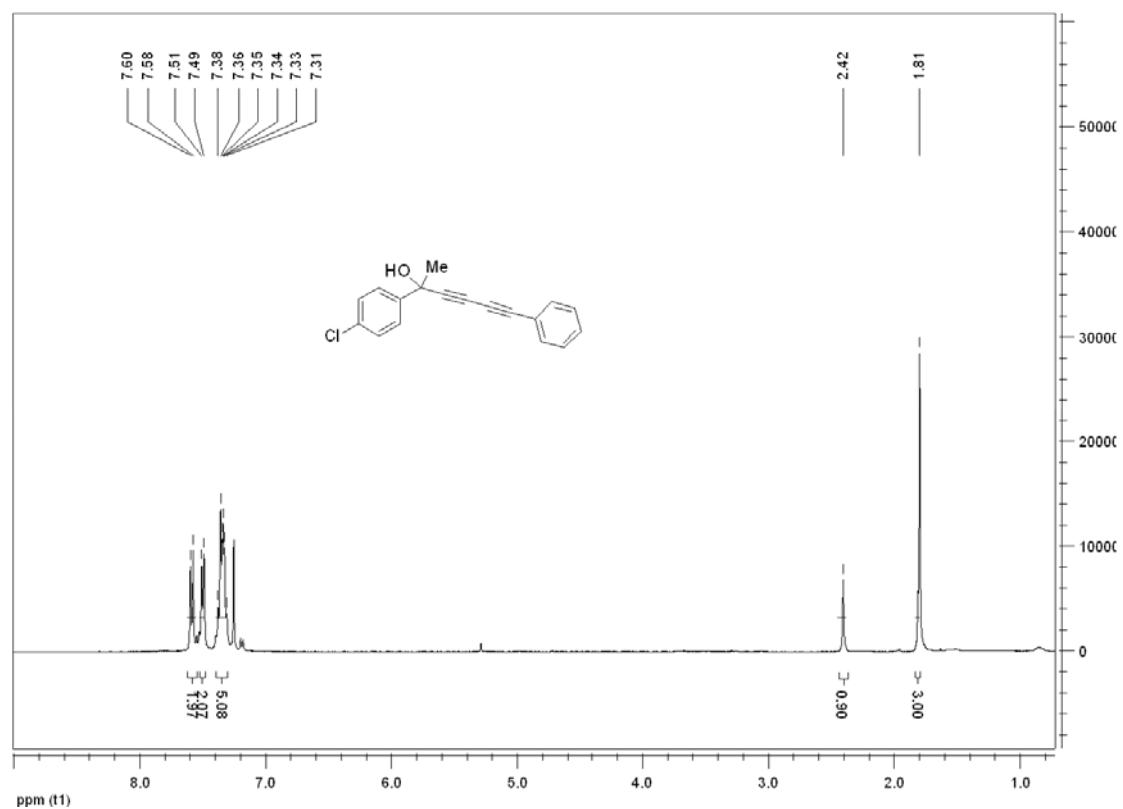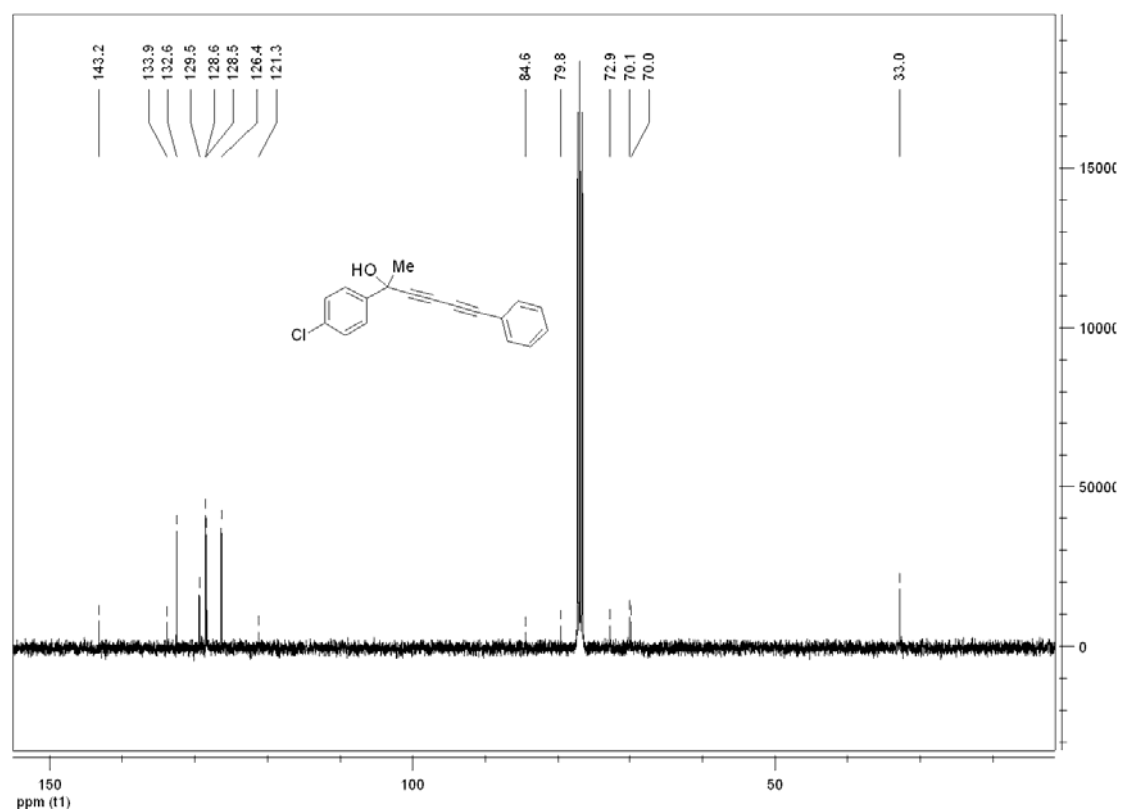

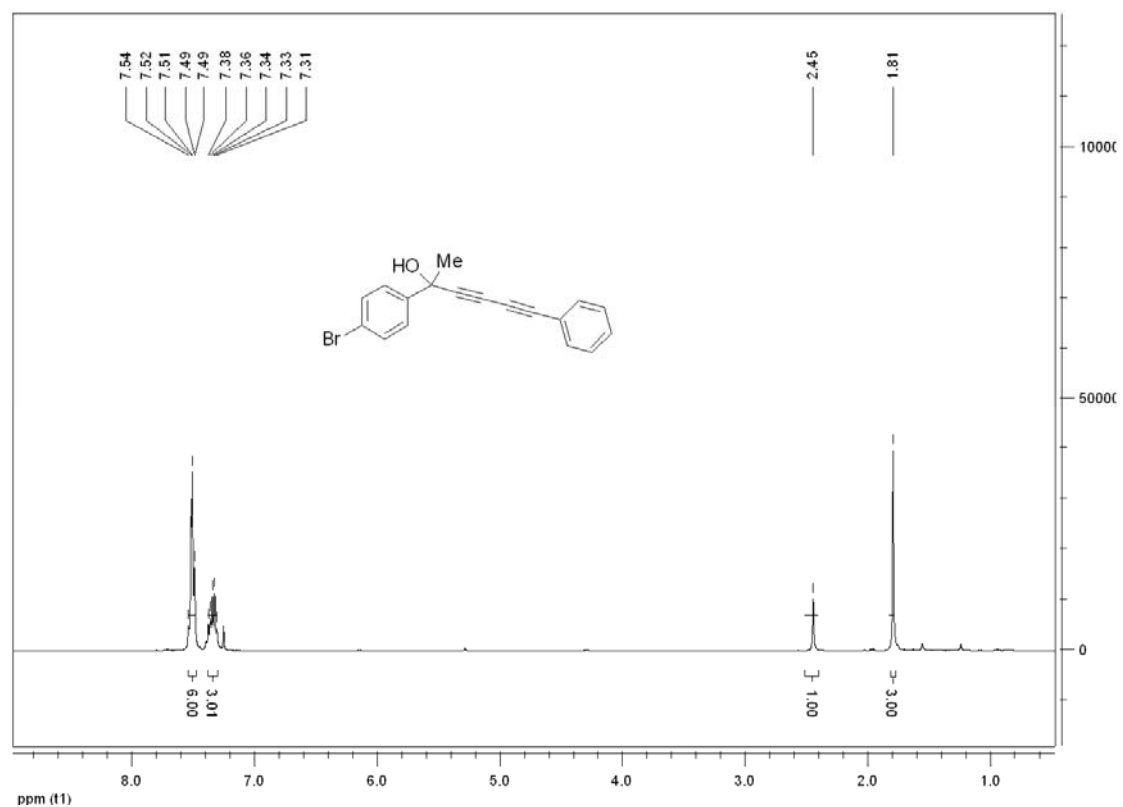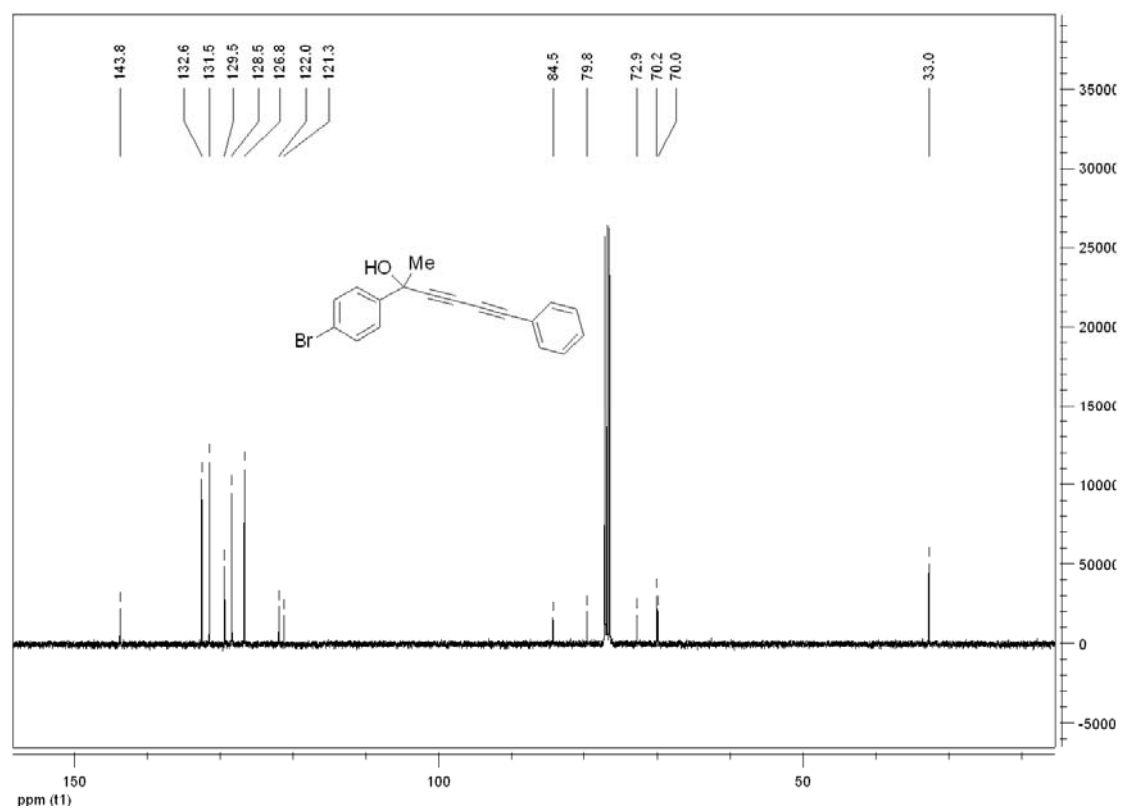

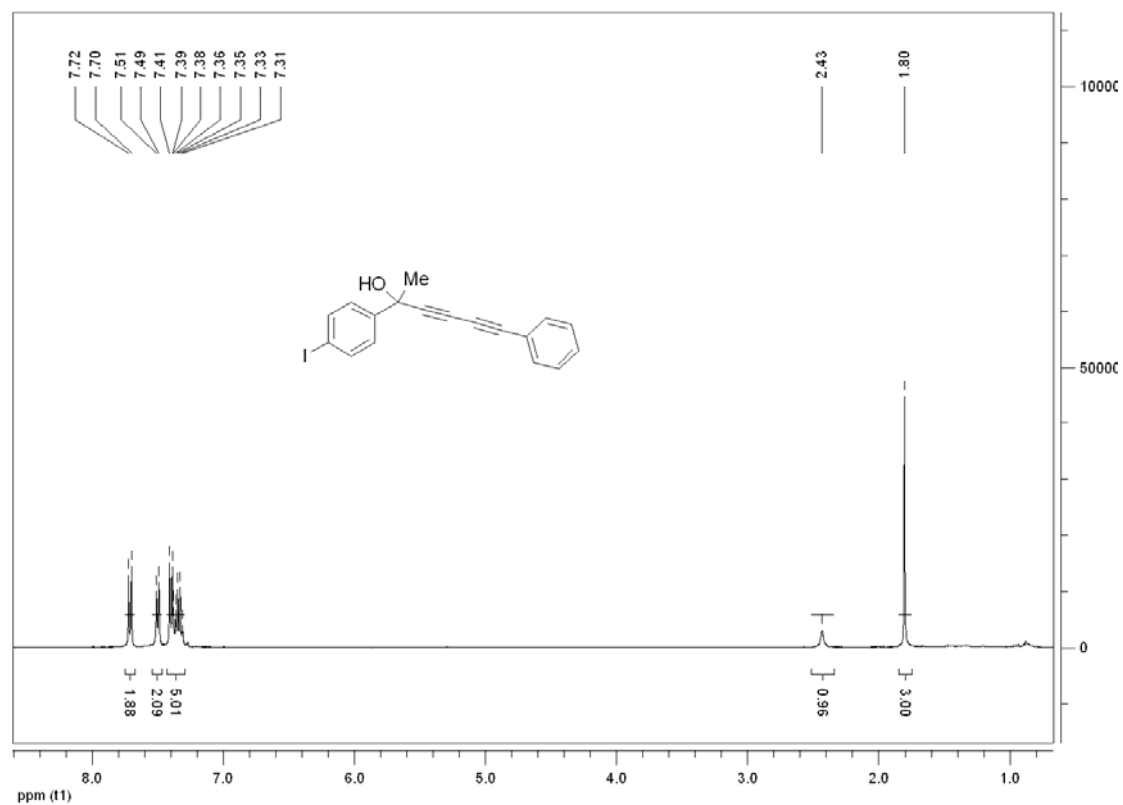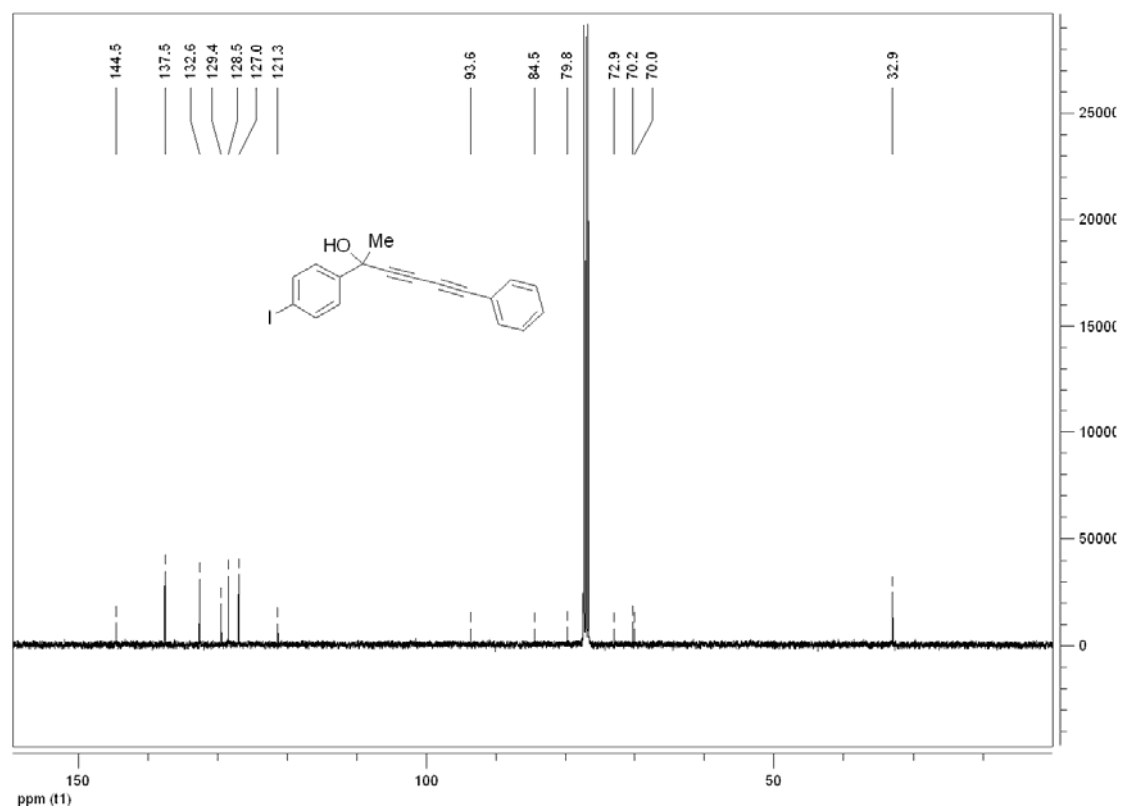



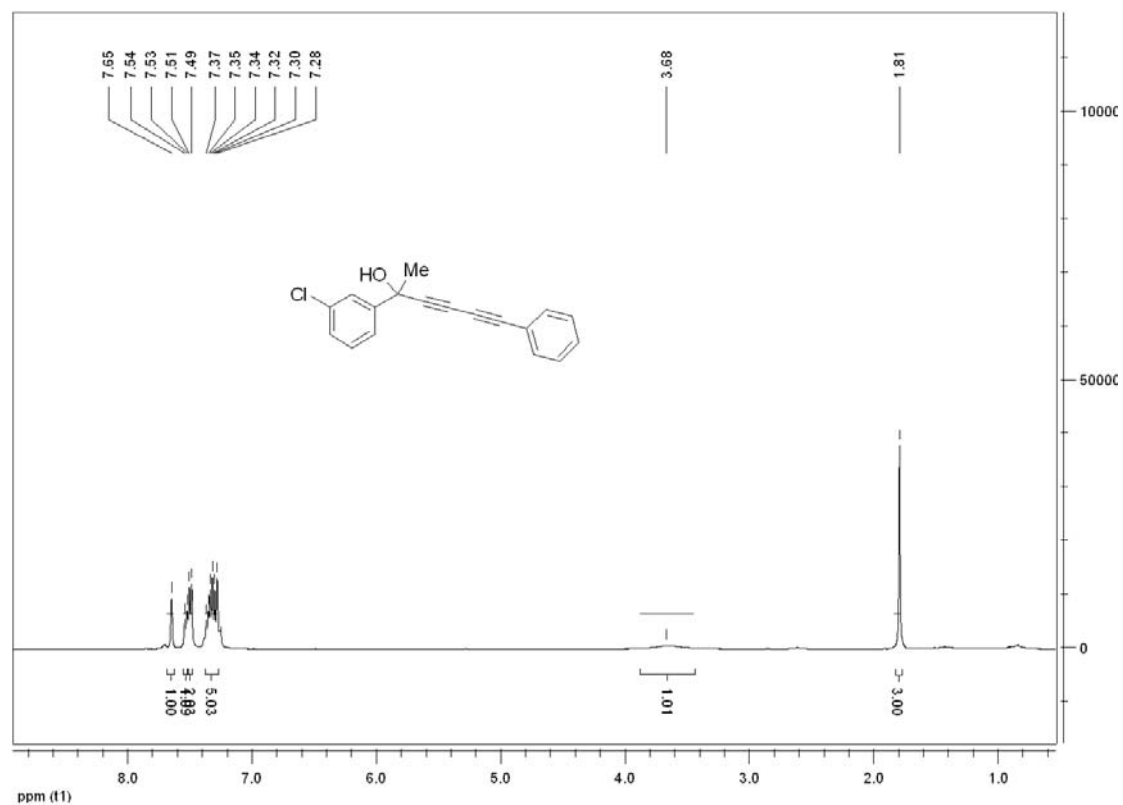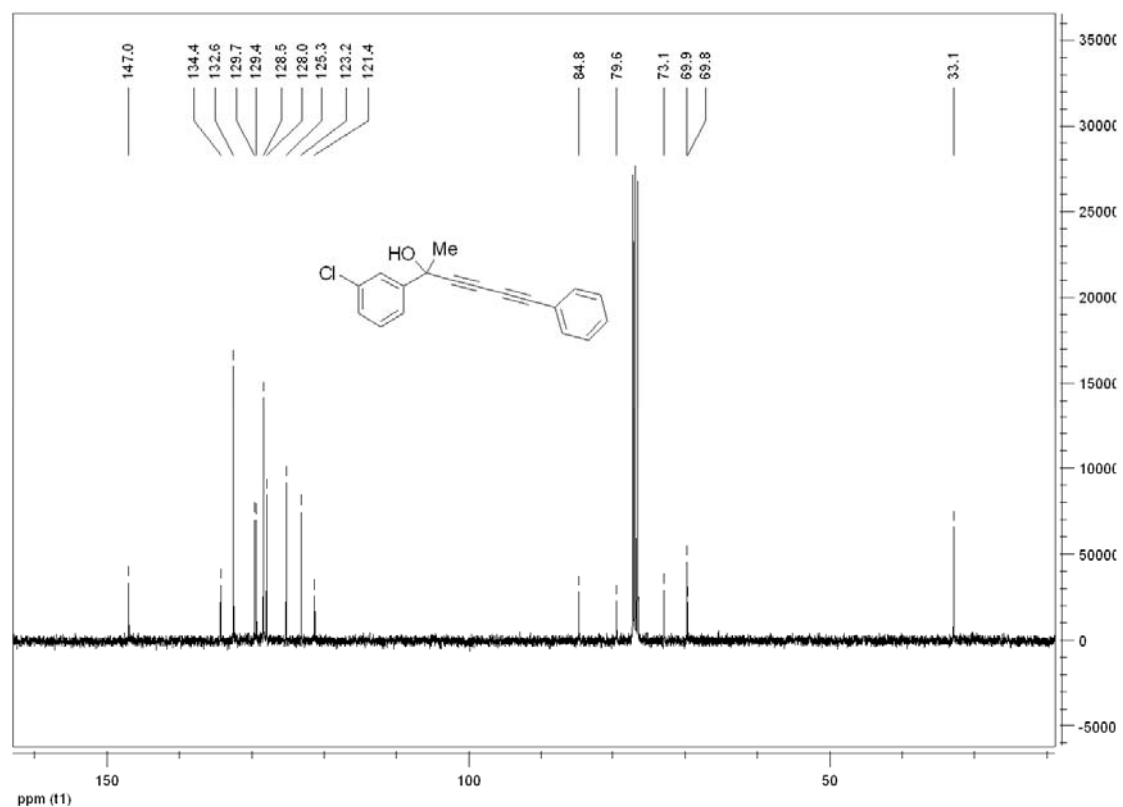

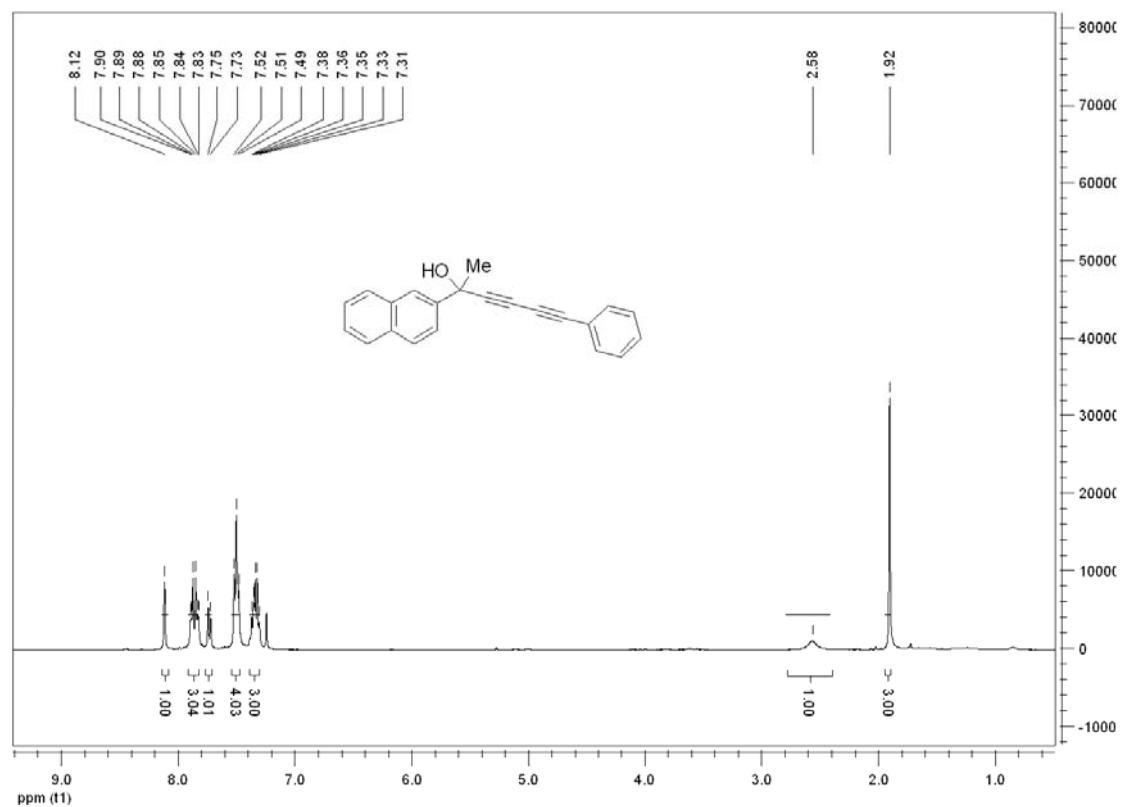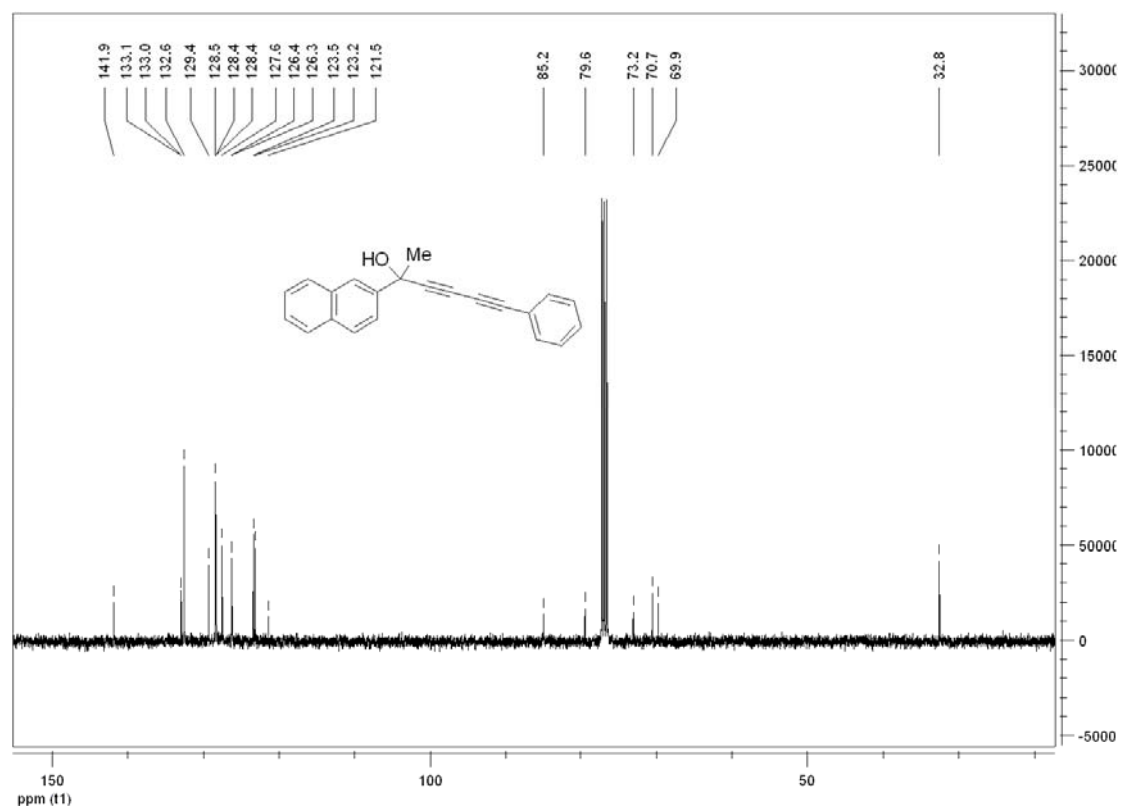

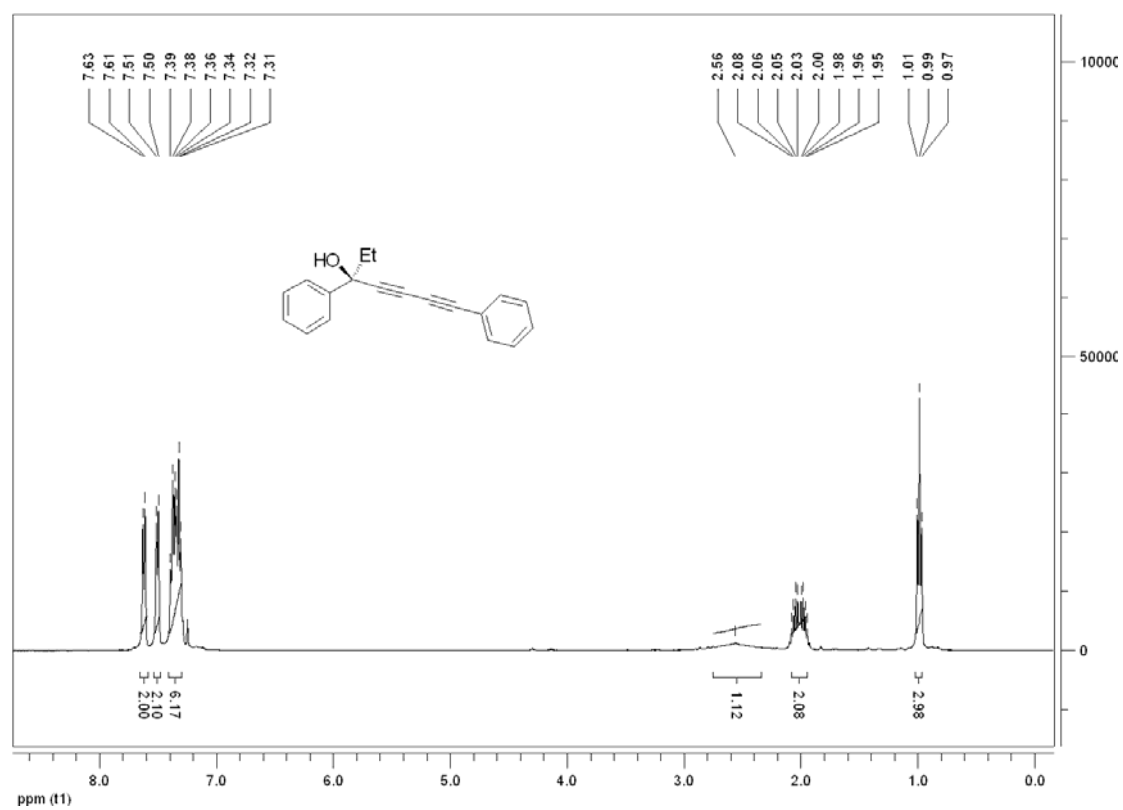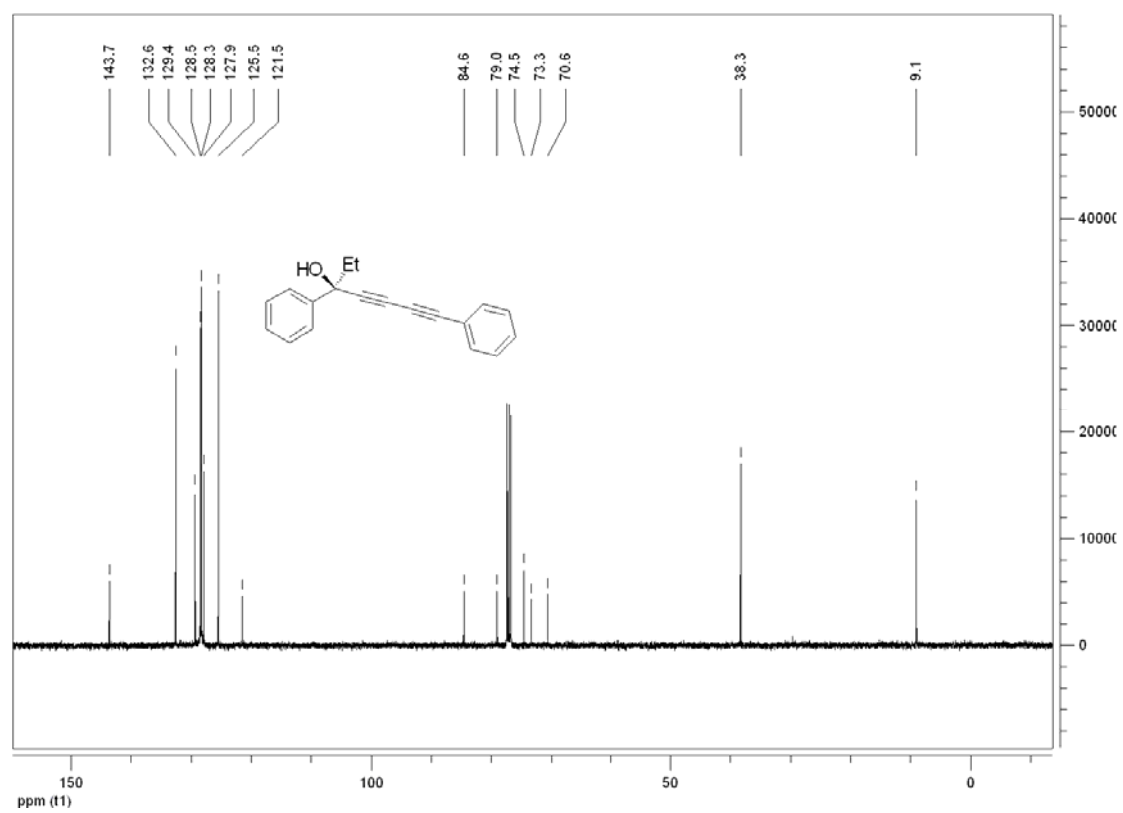

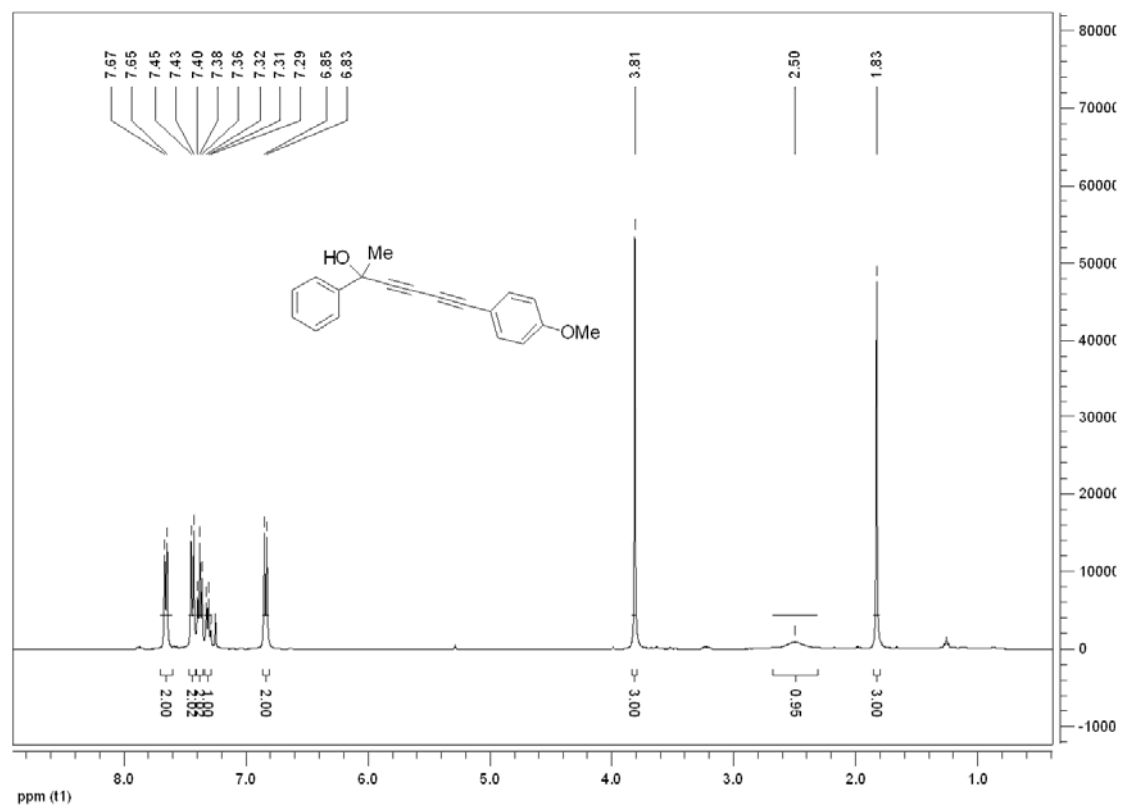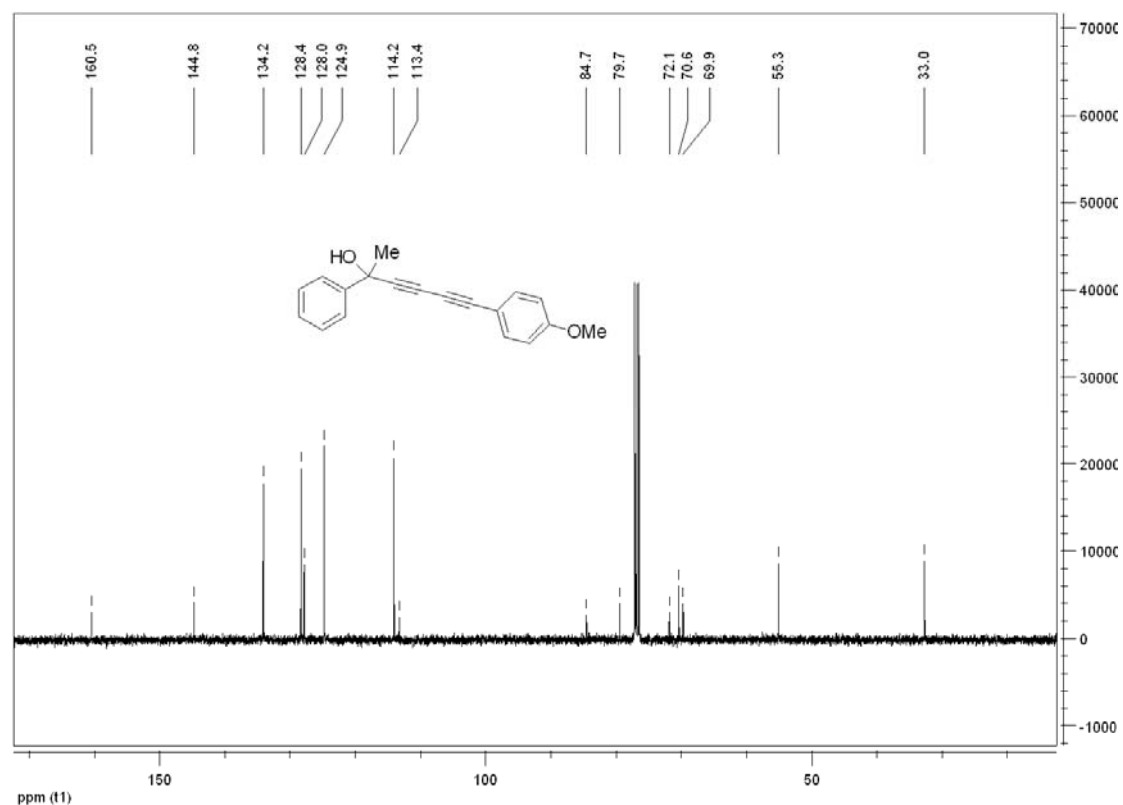

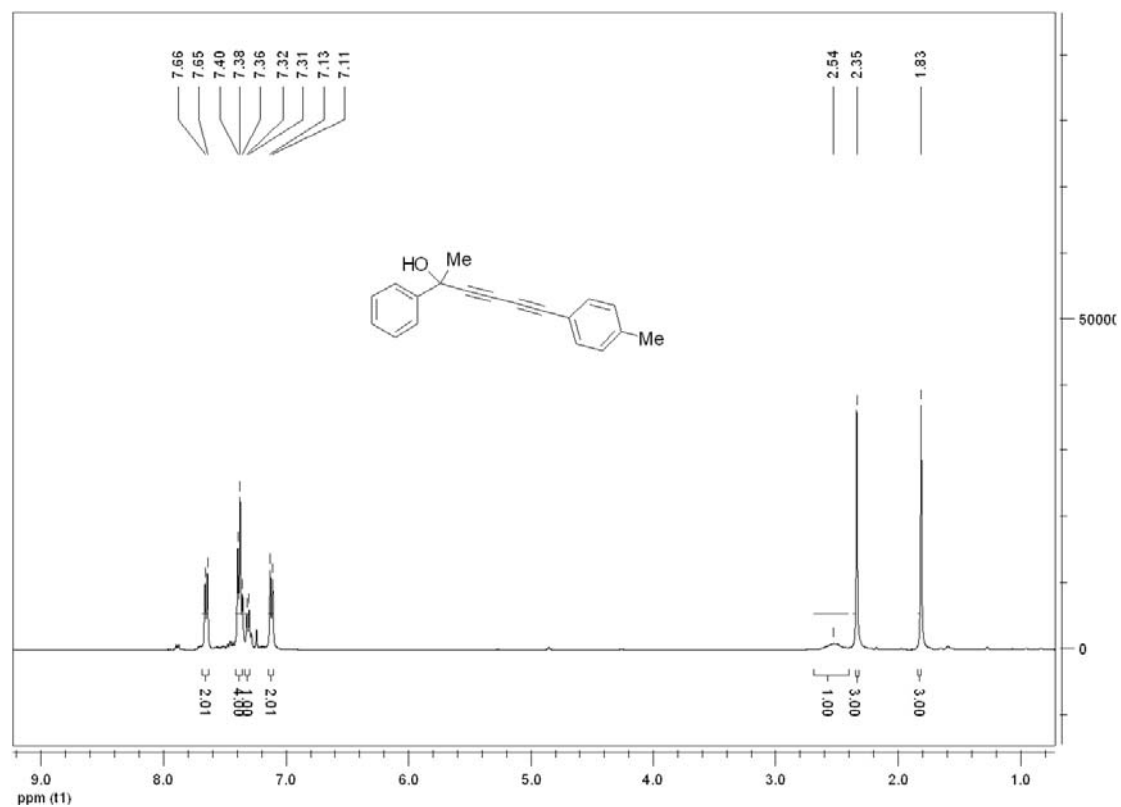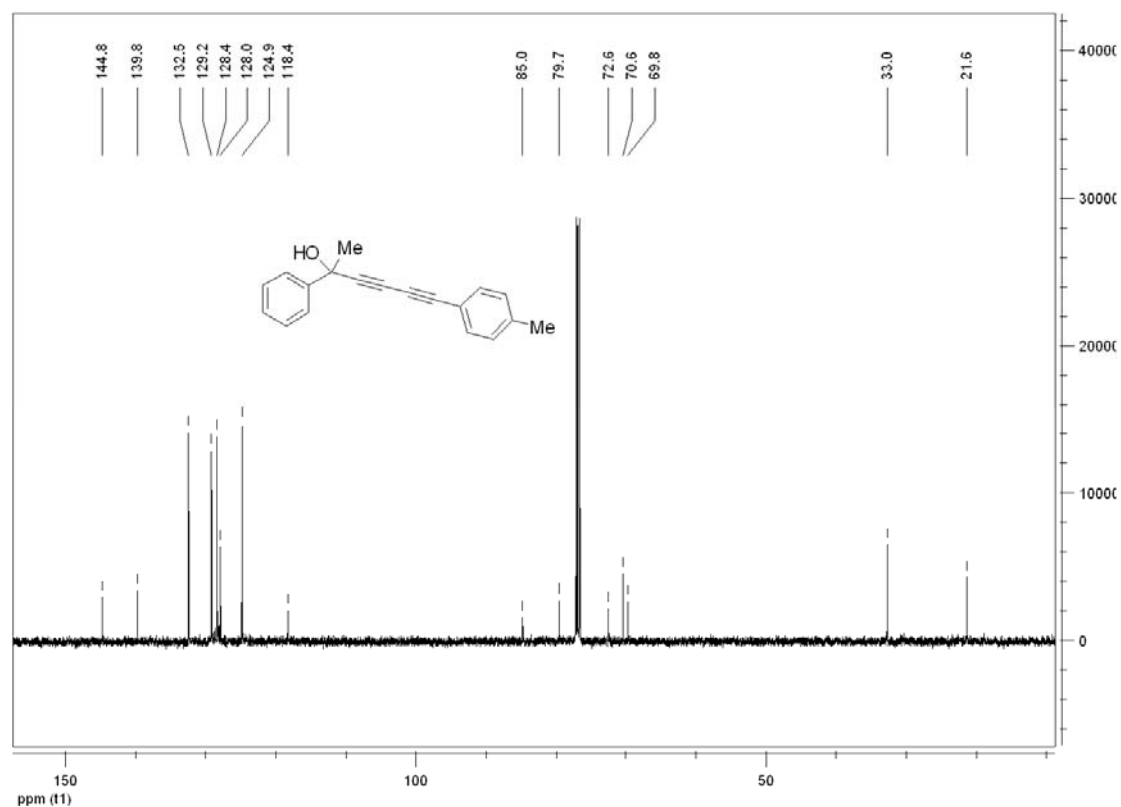

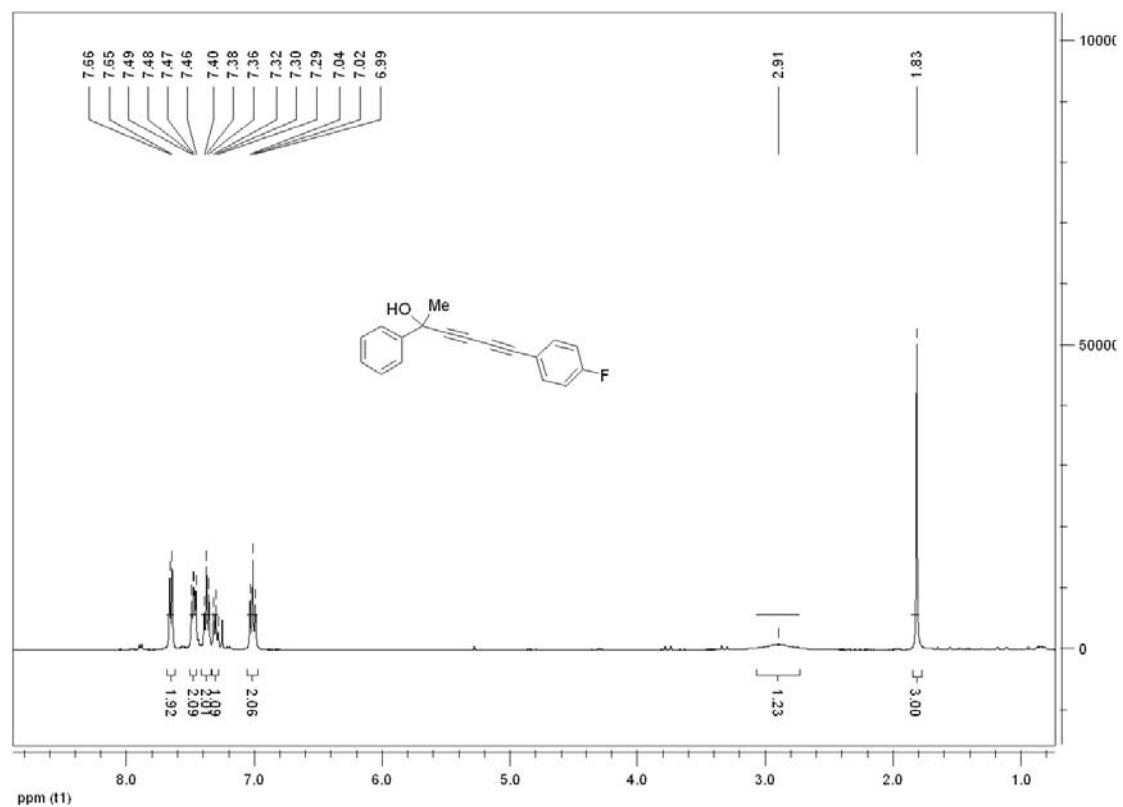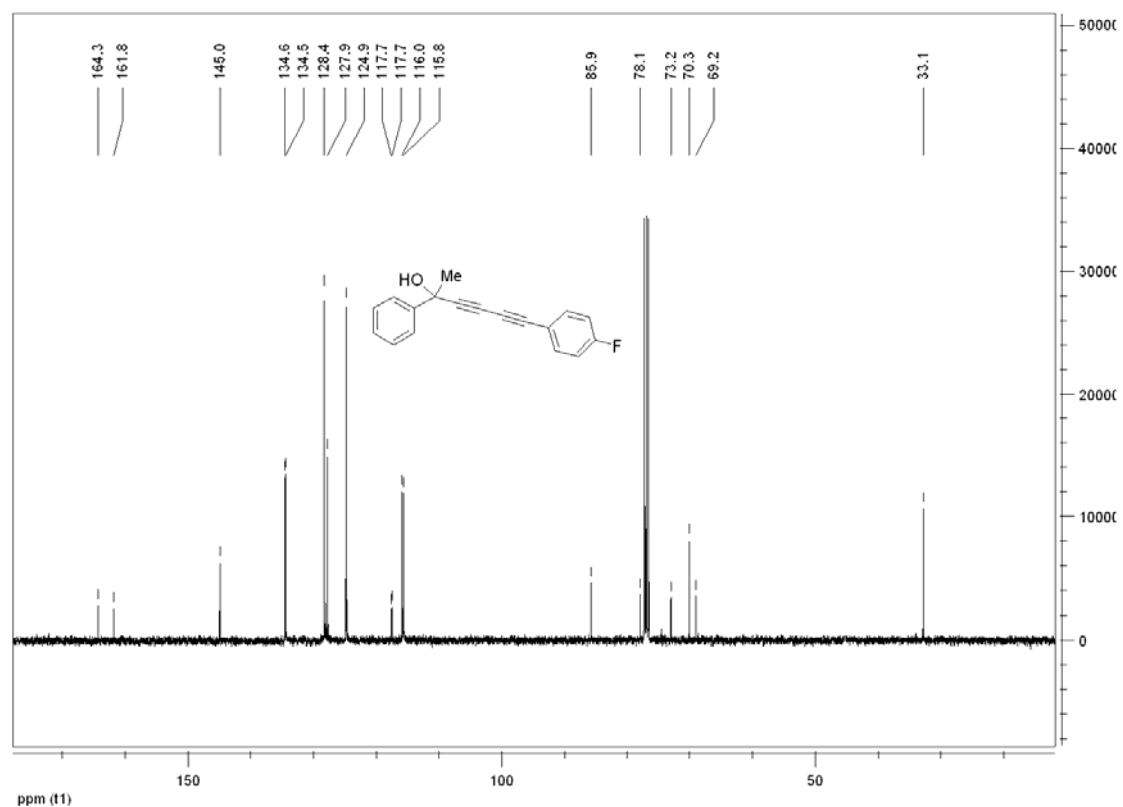

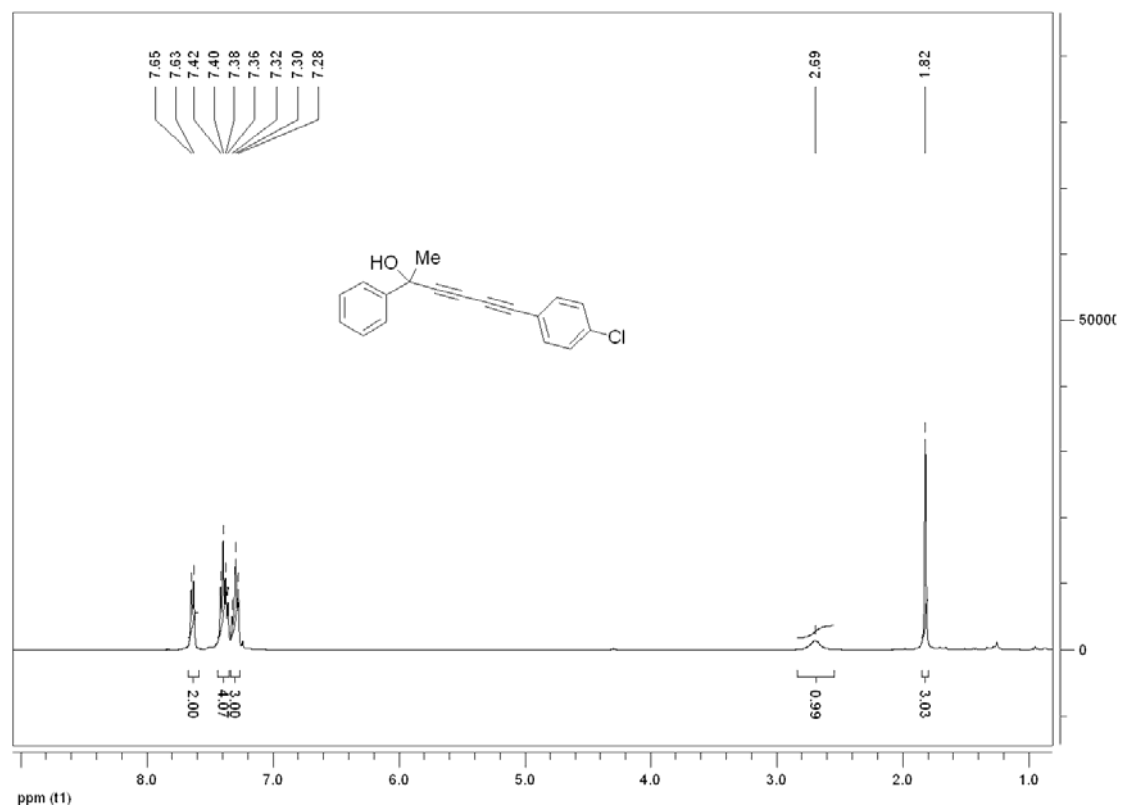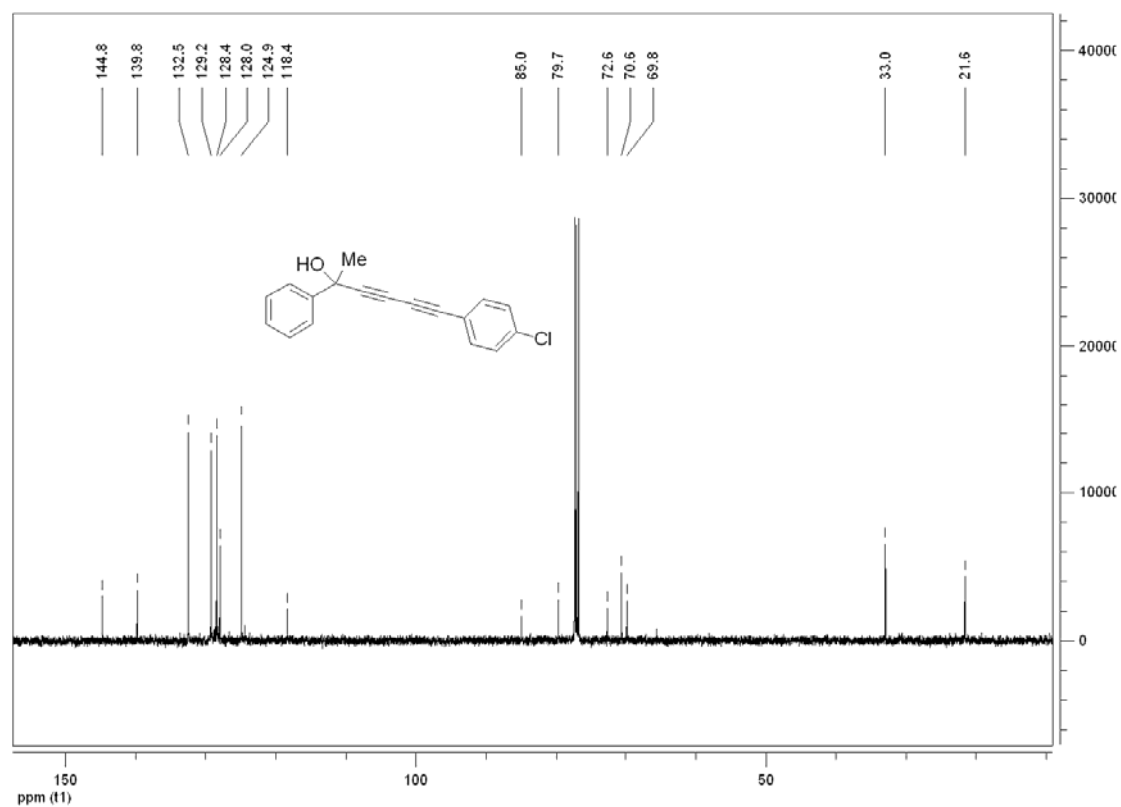

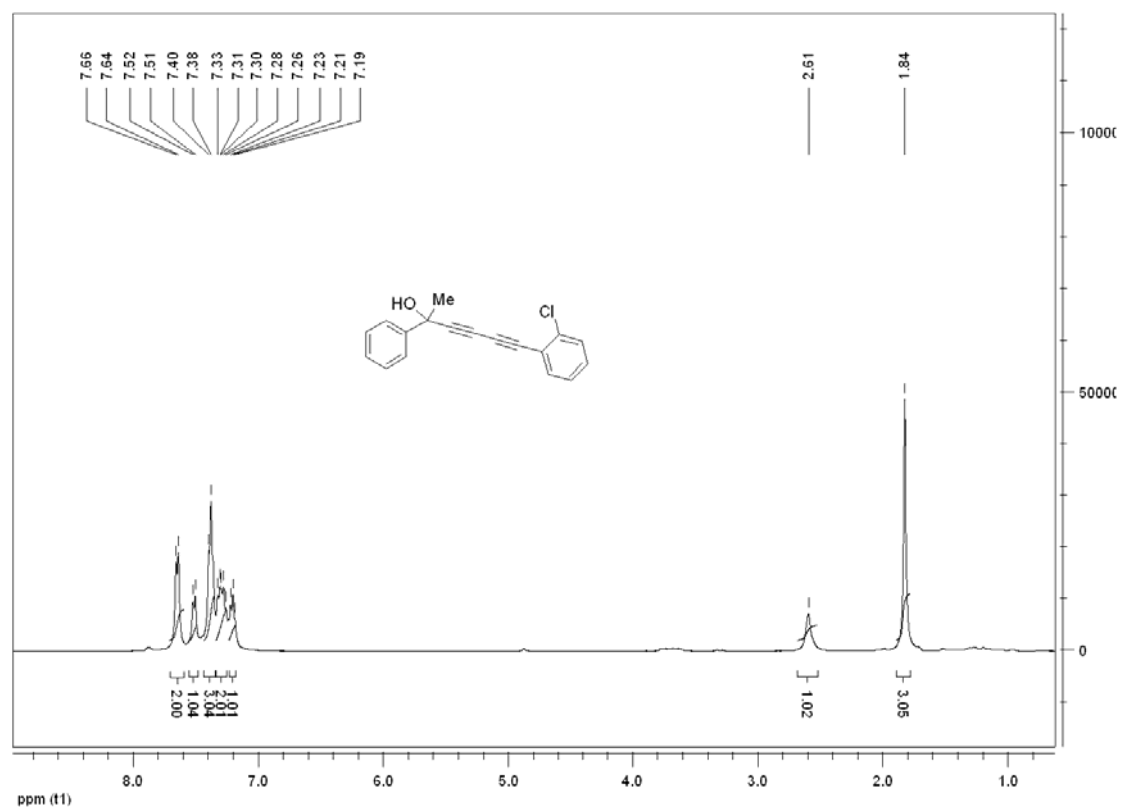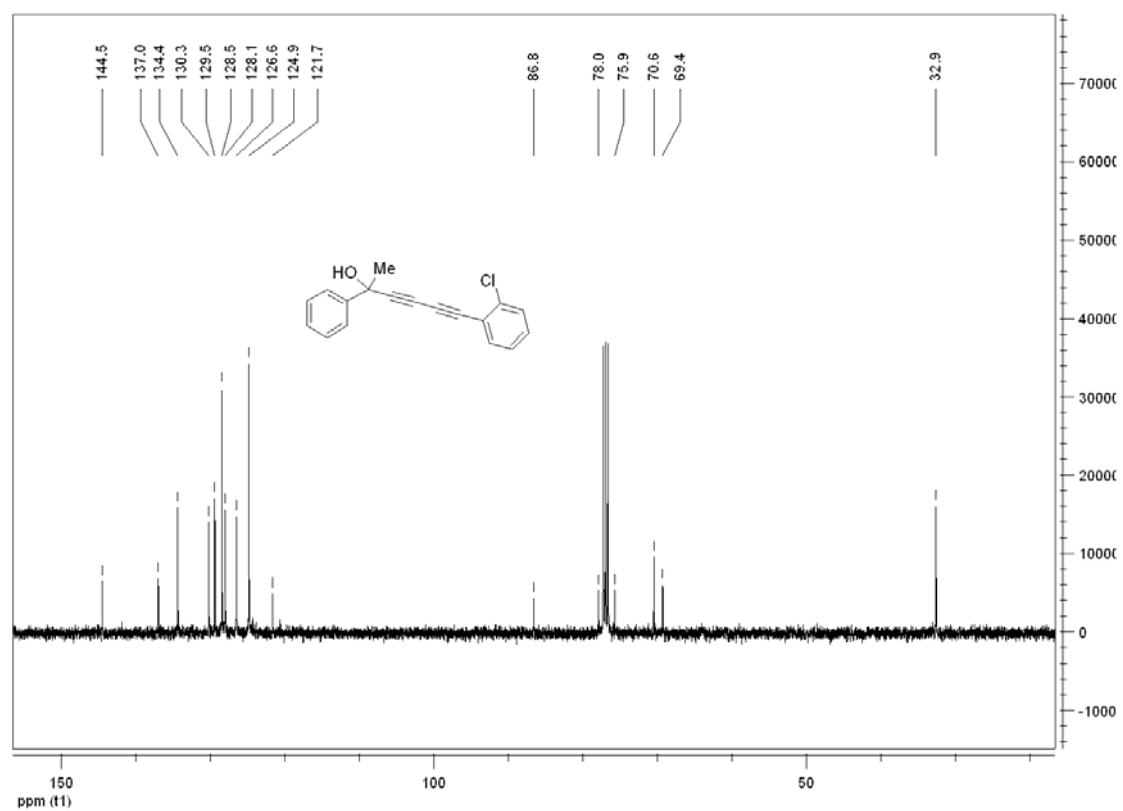



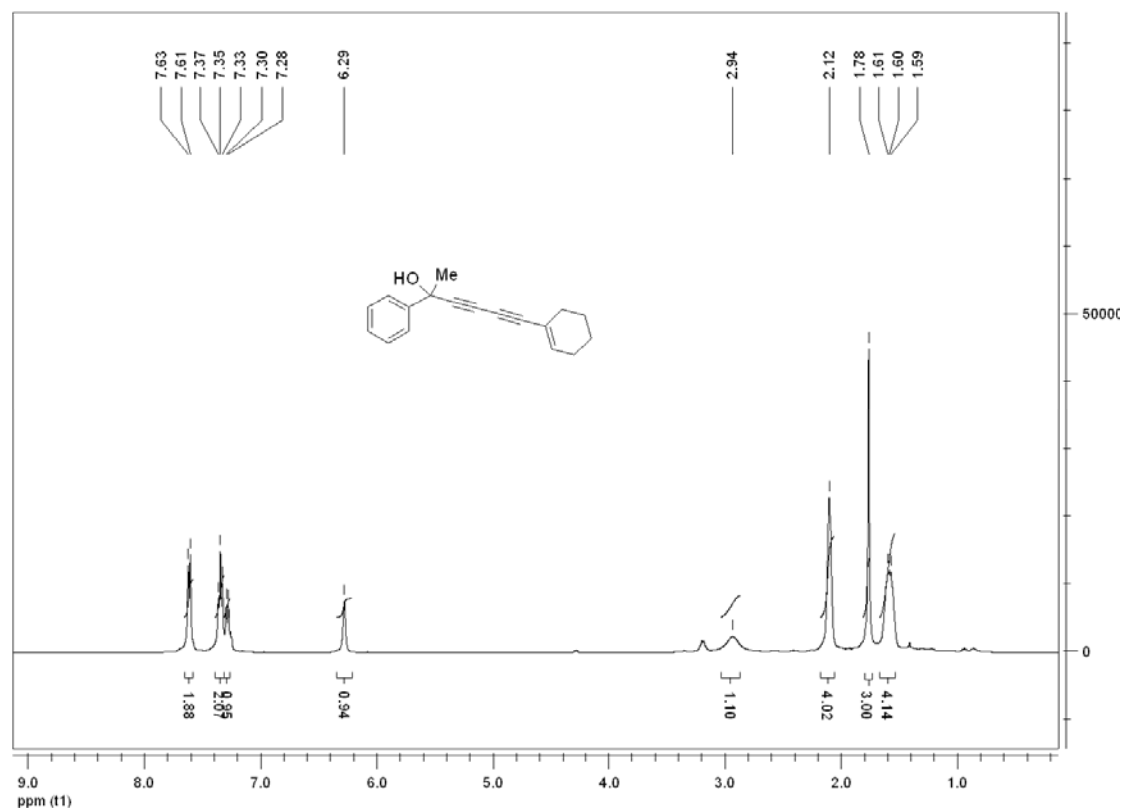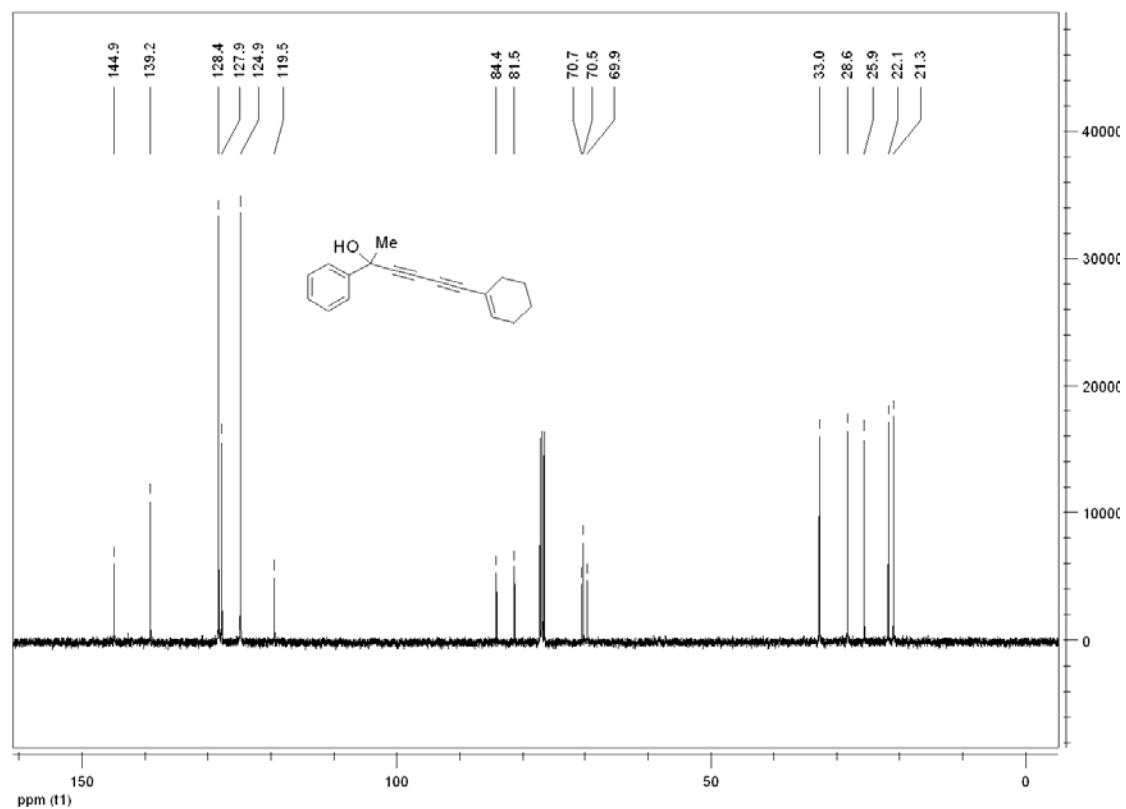

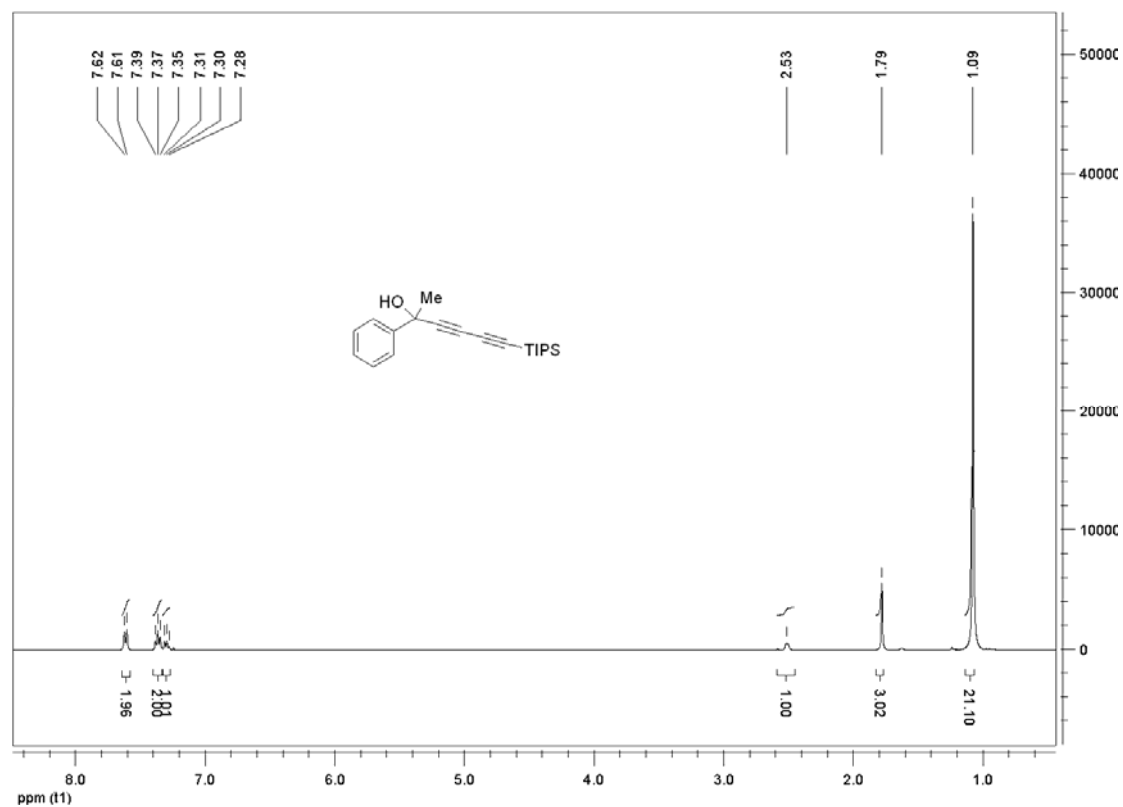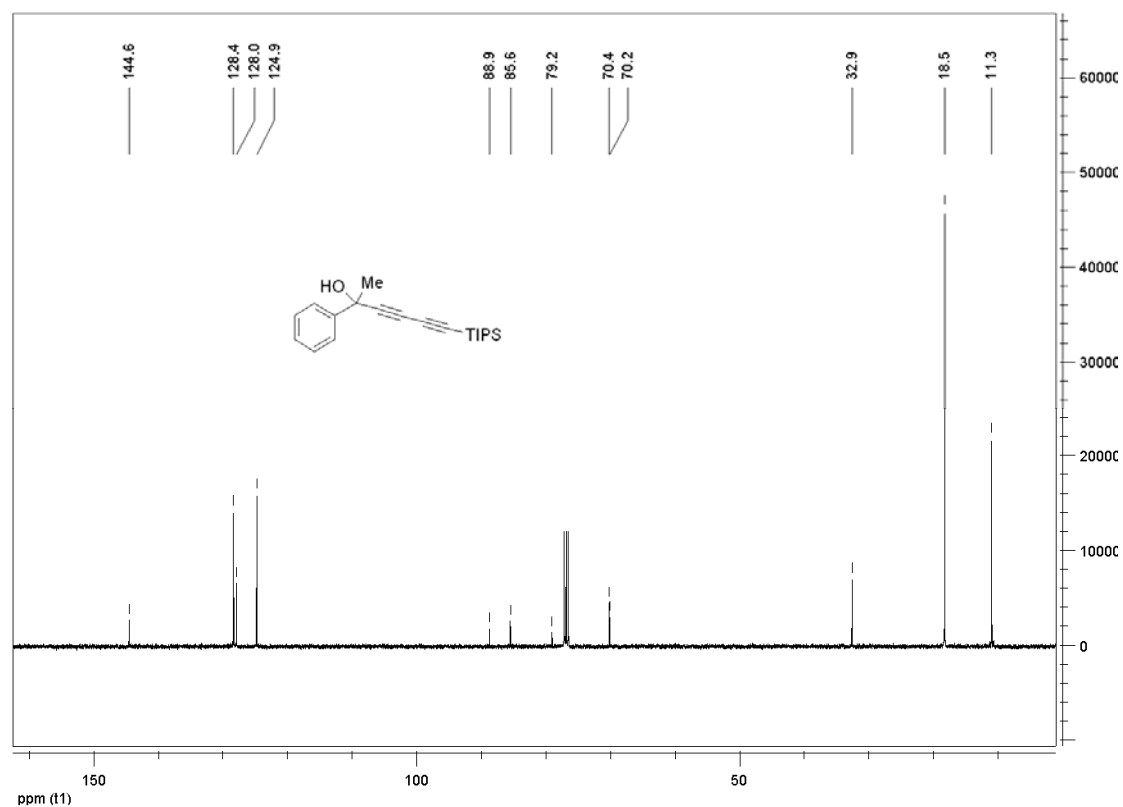

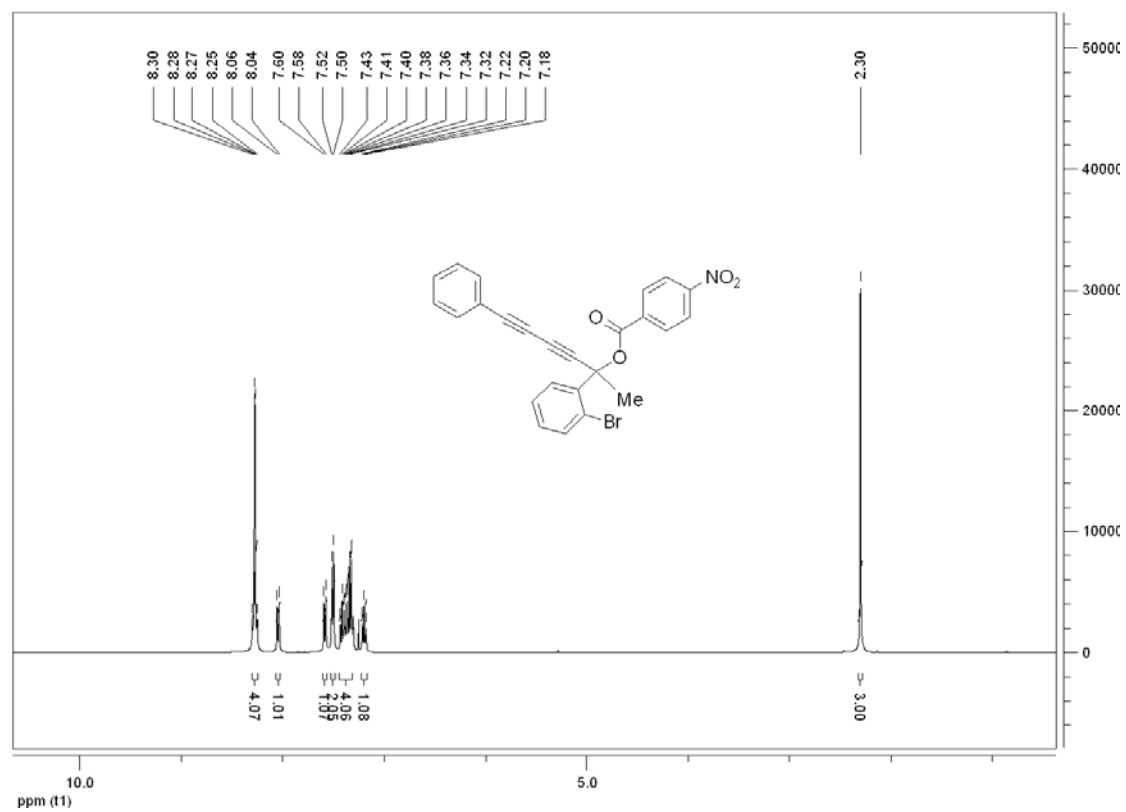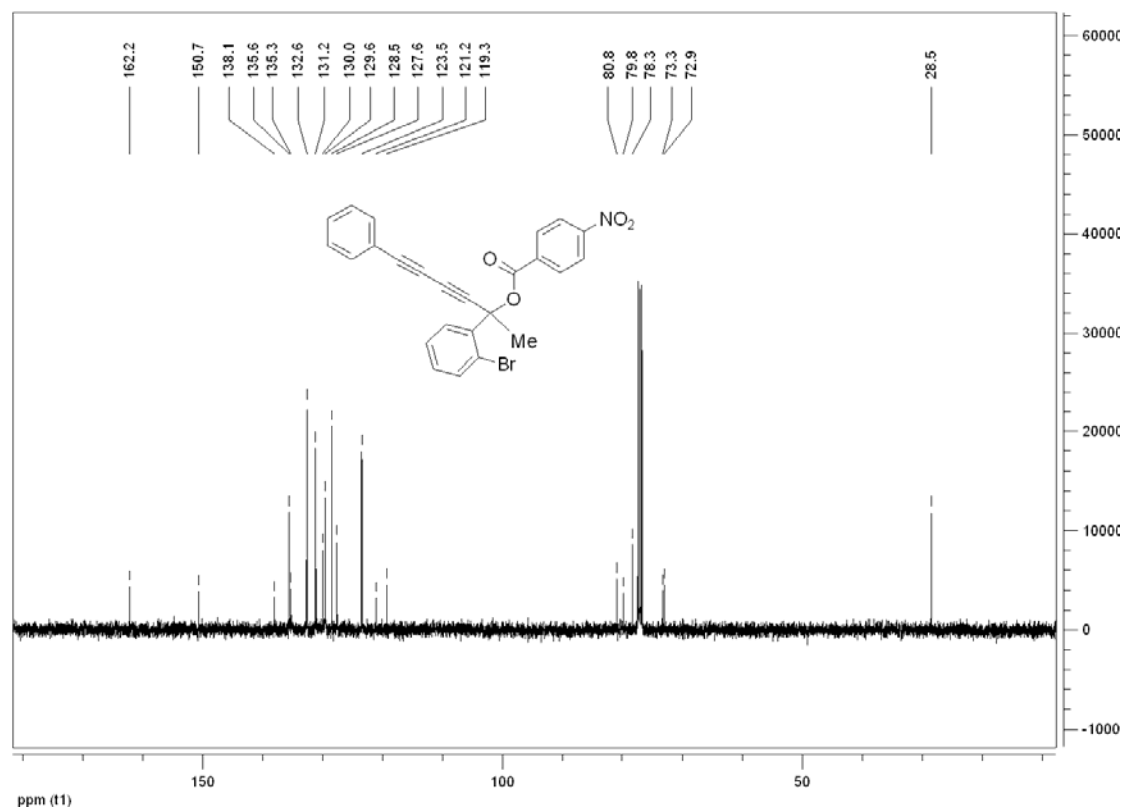

Sample Info : 254nm, OD-H, i-PrOH:Hexane = 10:90, 0.8 mL/min

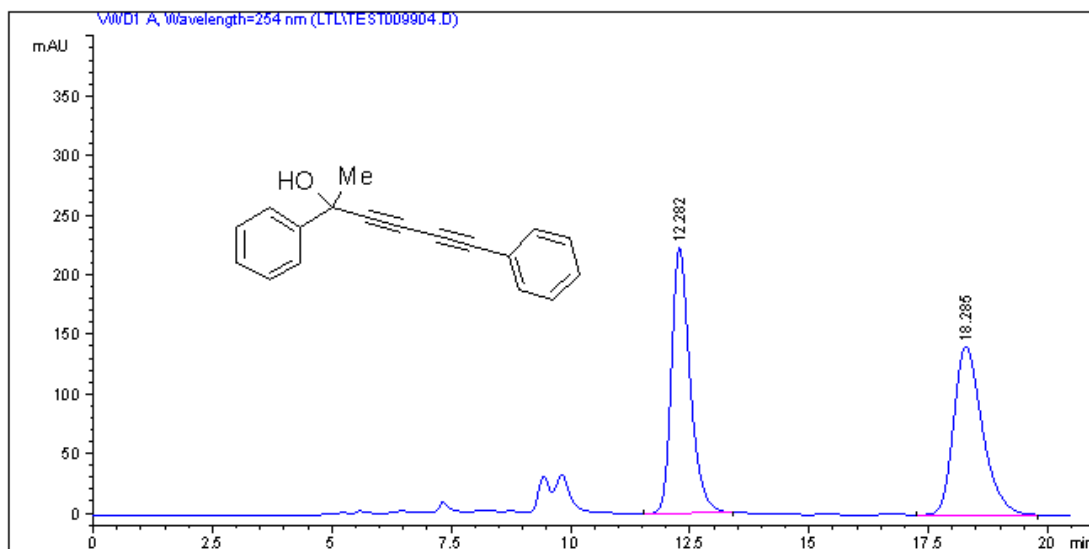

Signal 1: VWD1 A, Wavelength=254 nm

| Peak # | RetTime [min] | Type | Width [min] | Area mAU   | Area %  | Height [mAU] |
|--------|---------------|------|-------------|------------|---------|--------------|
| 1      | 12.282        | BB   | 0.4103      | 6028.77637 | 50.5104 | 222.80725    |
| 2      | 18.285        | VB   | 0.6400      | 5906.93213 | 49.4896 | 141.47630    |

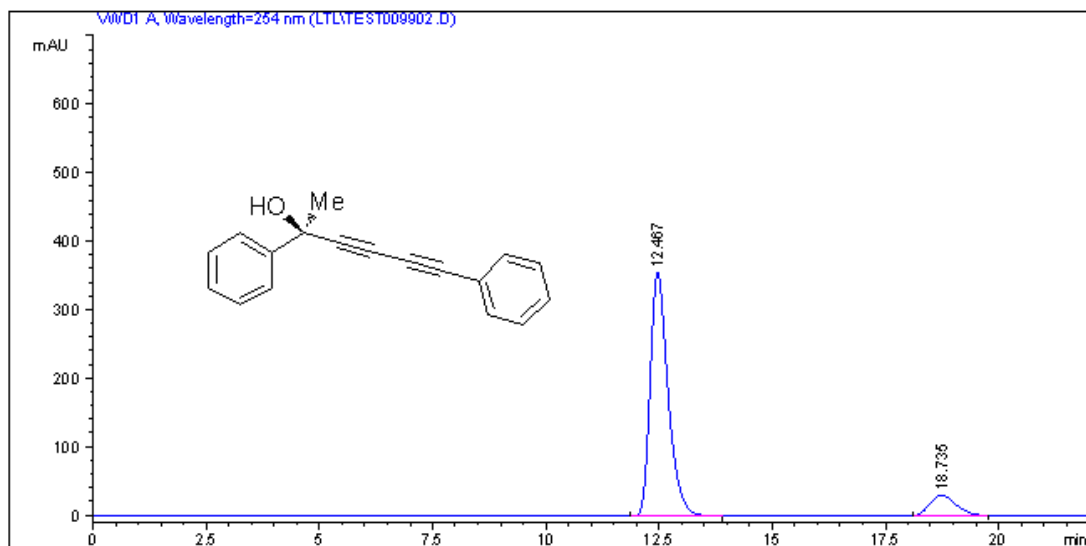

Signal 1: VWD1 A, Wavelength=254 nm

| Peak # | RetTime [min] | Type | Width [min] | Area mAU   | Area %  | Height [mAU] |
|--------|---------------|------|-------------|------------|---------|--------------|
| 1      | 12.467        | BB   | 0.4182      | 9776.57129 | 88.6844 | 355.69666    |
| 2      | 18.735        | BBA  | 0.6180      | 1247.42883 | 11.3156 | 30.71000     |

Sample Info : 254nm, IB, i-PrOH : Hexane = 5:95, 1.0 mL/min

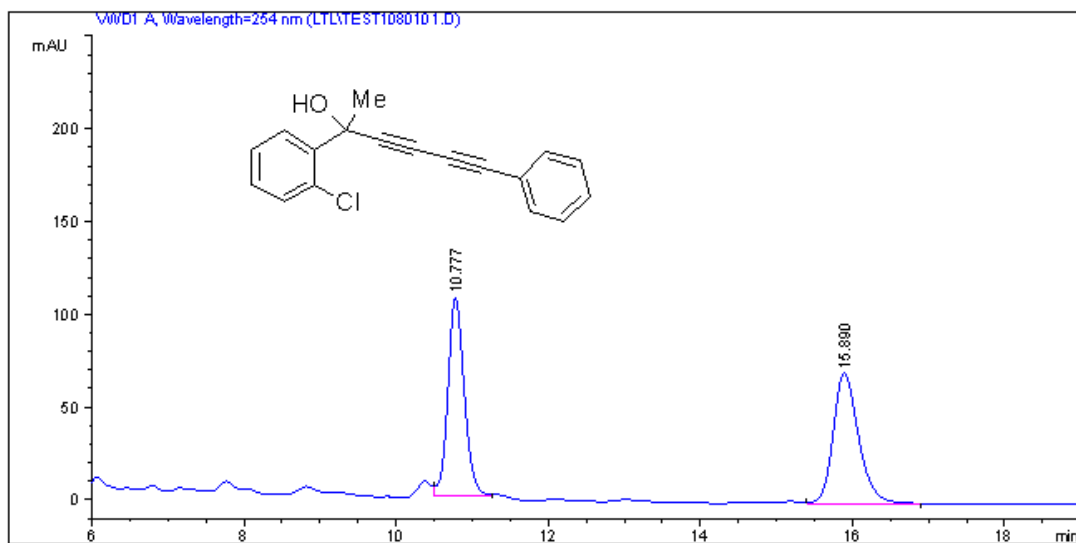

Signal 1: VWD1 A, Wavelength=254 nm

| Peak # | RetTime [min] | Type | Width [min] | Area mAU   | Area %  | Height [mAU] |
|--------|---------------|------|-------------|------------|---------|--------------|
| 1      | 10.777        | VB   | 0.2285      | 1599.69360 | 49.6088 | 106.86388    |
| 2      | 15.890        | VB   | 0.3527      | 1624.91992 | 50.3912 | 70.30116     |

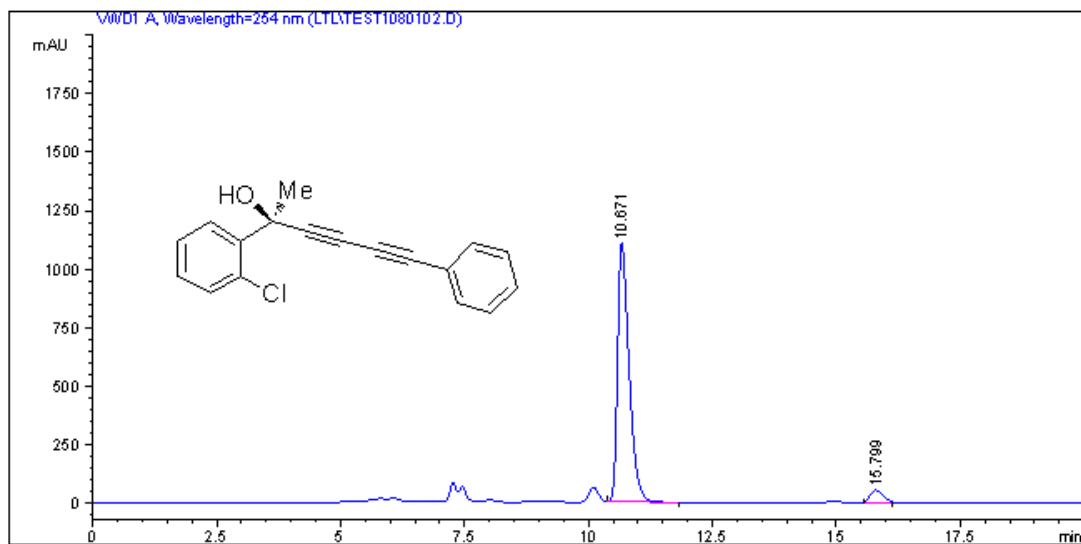

Signal 1: VWD1 A, Wavelength=254 nm

| Peak # | RetTime [min] | Type | Width [min] | Area mAU  | Area %  | Height [mAU] |
|--------|---------------|------|-------------|-----------|---------|--------------|
| 1      | 10.671        | EB   | 0.2448      | 1.78097e4 | 94.8293 | 1104.86743   |
| 2      | 15.799        | PM   | 0.3130      | 971.10297 | 5.1707  | 51.71267     |

Sample Info : 254nm, IB, i-PrOH : Hexane =15:85, 1.0 mL/min

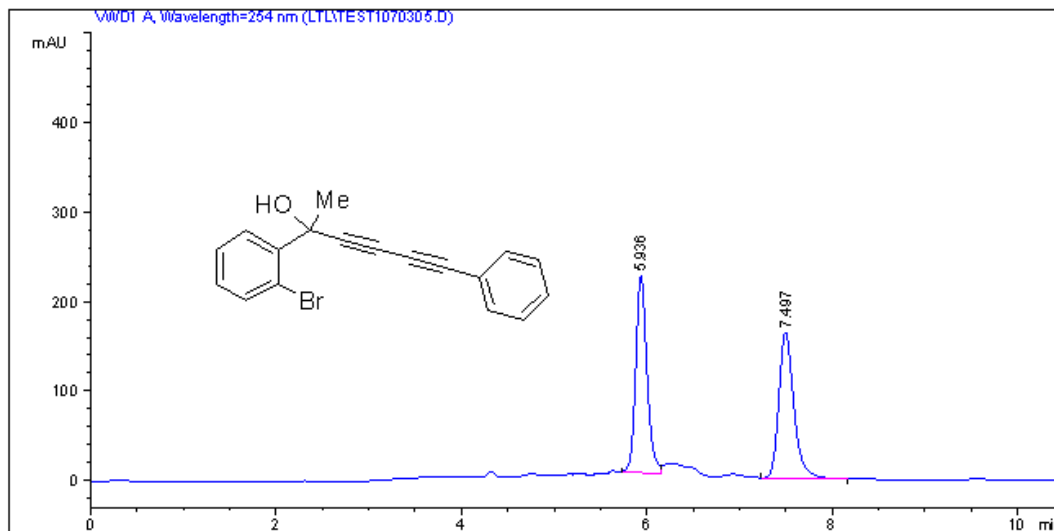

Signal 1: VWD1 A, Wavelength=254 nm

| Peak # | RetTime [min] | Type | Width [min] | Area mAU   | Area %  | Height [mAU] |
|--------|---------------|------|-------------|------------|---------|--------------|
| 1      | 5.936         | BV   | 0.1290      | 1856.68982 | 50.1957 | 220.00349    |
| 2      | 7.497         | VV   | 0.1725      | 1842.21179 | 49.8043 | 163.10420    |

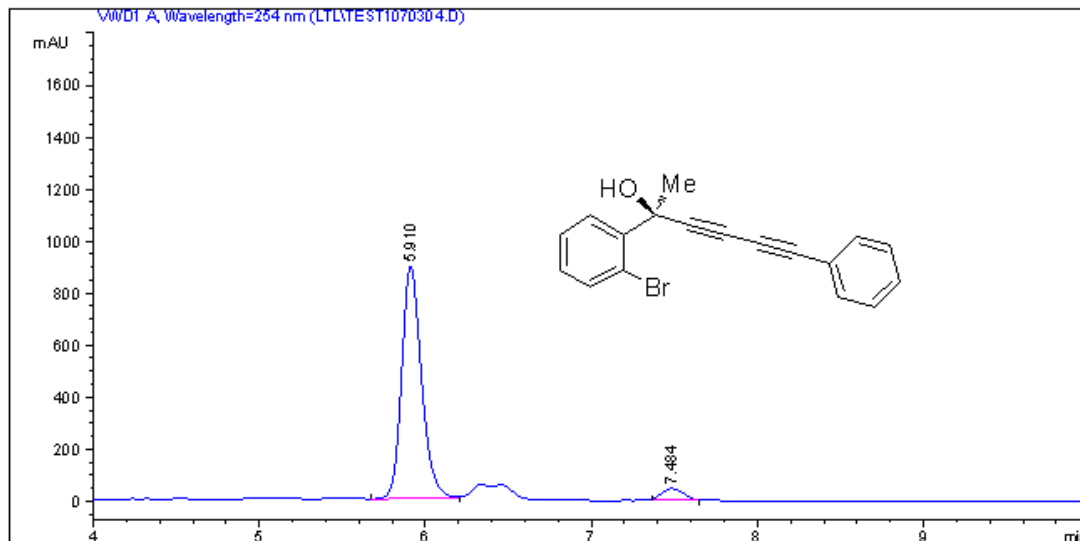

Signal 1: VWD1 A, Wavelength=254 nm

| Peak # | RetTime [min] | Type | Width [min] | Area mAU   | Area %  | Height [mAU] |
|--------|---------------|------|-------------|------------|---------|--------------|
| 1      | 5.910         | VV   | 0.1275      | 7440.18799 | 94.9761 | 895.13458    |
| 2      | 7.484         | PM   | 0.1494      | 393.56369  | 5.0239  | 43.89990     |

Sample Info : 254nm, IB, i-PrOH : Hexane = 5:95, 1.0 mL/min

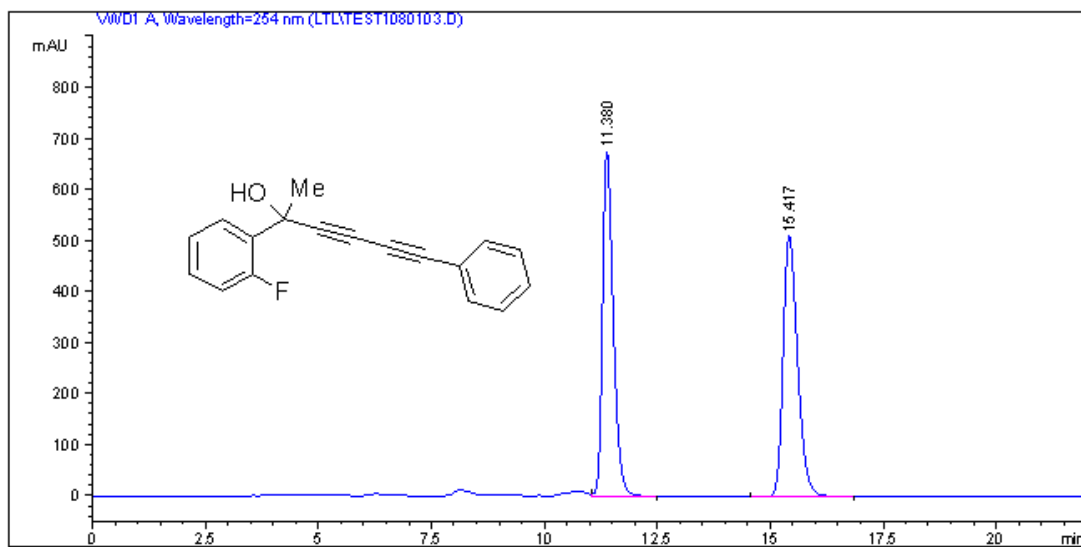

Signal 1: VWD1 A, Wavelength=254 nm

| Peak # | RetTime [min] | Type | Width [min] | Area mAU *s | Height [mAU] | Area %  |
|--------|---------------|------|-------------|-------------|--------------|---------|
| 1      | 11.380        | VB   | 0.2529      | 1.11873e4   | 675.52533    | 49.5217 |
| 2      | 15.417        | BB   | 0.3435      | 1.14033e4   | 510.63538    | 50.4783 |

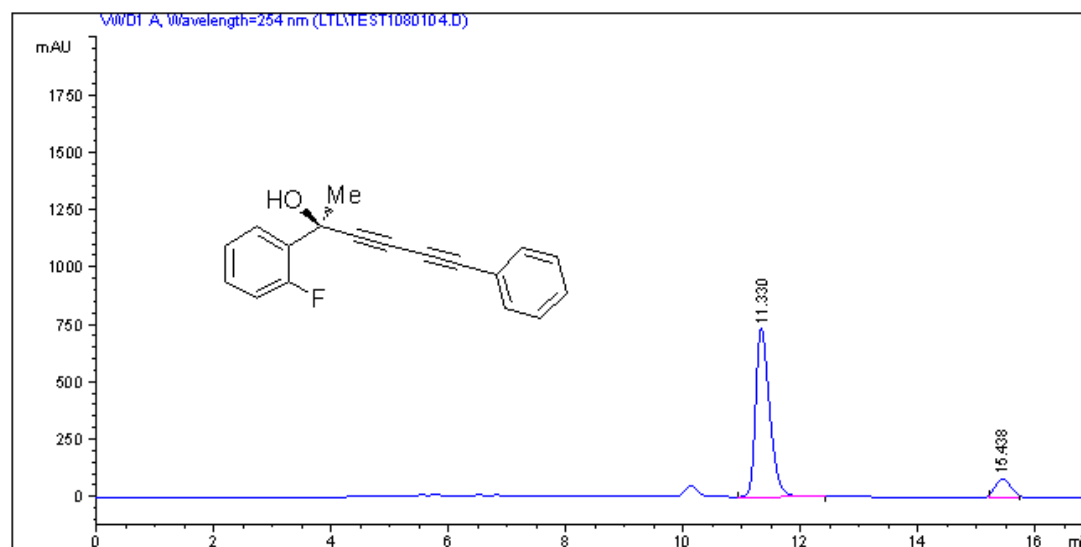

Signal 1: VWD1 A, Wavelength=254 nm

| Peak # | RetTime [min] | Type | Width [min] | Area mAU *s | Height [mAU] | Area %  |
|--------|---------------|------|-------------|-------------|--------------|---------|
| 1      | 11.330        | BB   | 0.2532      | 1.21559e4   | 732.73633    | 89.2175 |
| 2      | 15.438        | MM   | 0.3091      | 1469.12659  | 79.21481     | 10.7825 |

Sample Info : 254nm. IB. i-PrOH : Hexane = 20:80. 1.0 mL/min

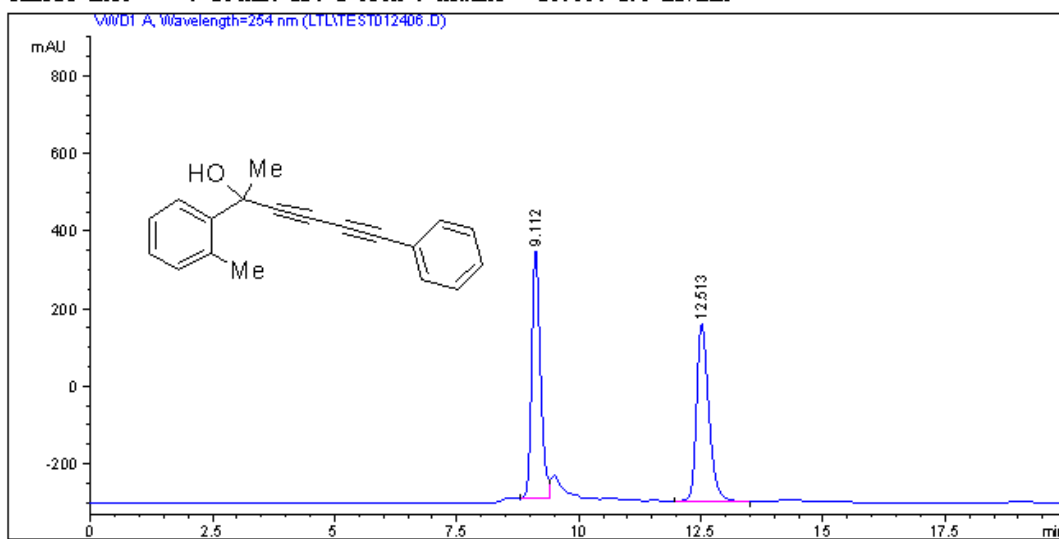

Signal 1: VWD1 A, Wavelength=254 nm

| Peak # | RetTime [min] | Type | Width [min] | Area mAU *s | Height [mAU] | Area %  |
|--------|---------------|------|-------------|-------------|--------------|---------|
| 1      | 9.112         | VV   | 0.1916      | 8040.36133  | 640.34326    | 50.0424 |
| 2      | 12.513        | BB   | 0.2672      | 8026.75195  | 457.81573    | 49.9576 |

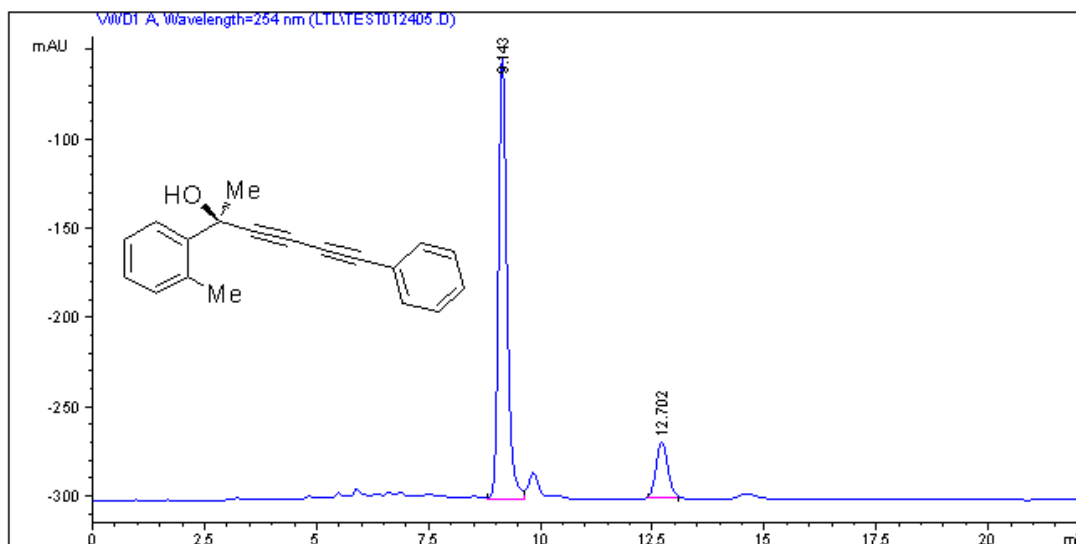

Signal 1: VWD1 A, Wavelength=254 nm

| Peak # | RetTime [min] | Type | Width [min] | Area mAU *s | Height [mAU] | Area %  |
|--------|---------------|------|-------------|-------------|--------------|---------|
| 1      | 9.143         | VV   | 0.2009      | 3260.36060  | 246.46223    | 85.6533 |
| 2      | 12.702        | MM   | 0.2949      | 546.09961   | 30.86733     | 14.3467 |



Sample Info : 254nm, OD-H, i-PrOH : Hexane =5:95, 0.8 mL/min

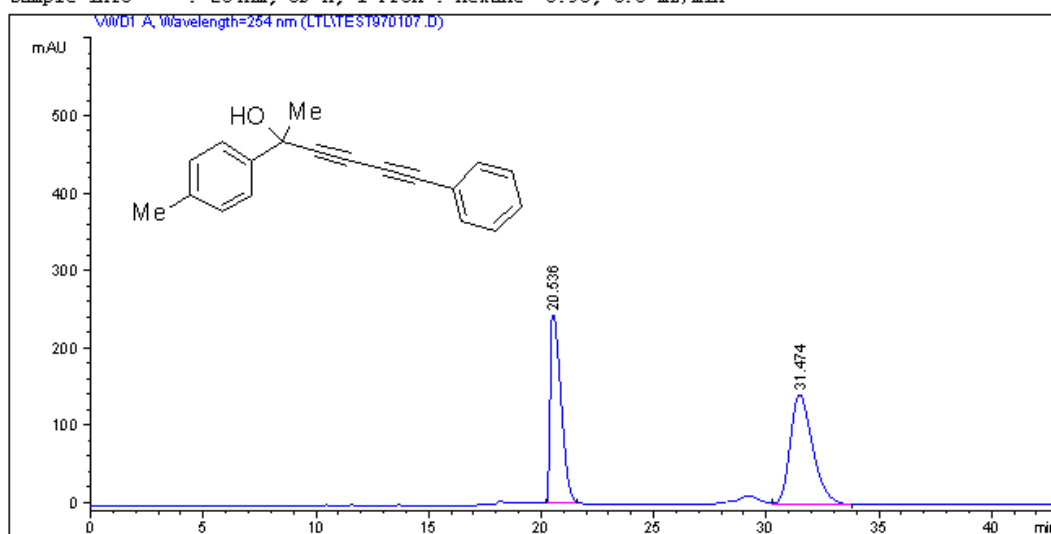

Signal 1: VWD1 A, Wavelength=254 nm

| Peak # | RetTime [min] | Type | Width [min] | Area mAU   | Area %  | Height [mAU] |
|--------|---------------|------|-------------|------------|---------|--------------|
| 1      | 20.536        | PM   | 0.6805      | 9921.72852 | 50.2495 | 243.00238    |
| 2      | 31.474        | VB   | 1.0532      | 9823.19629 | 49.7505 | 141.98685    |

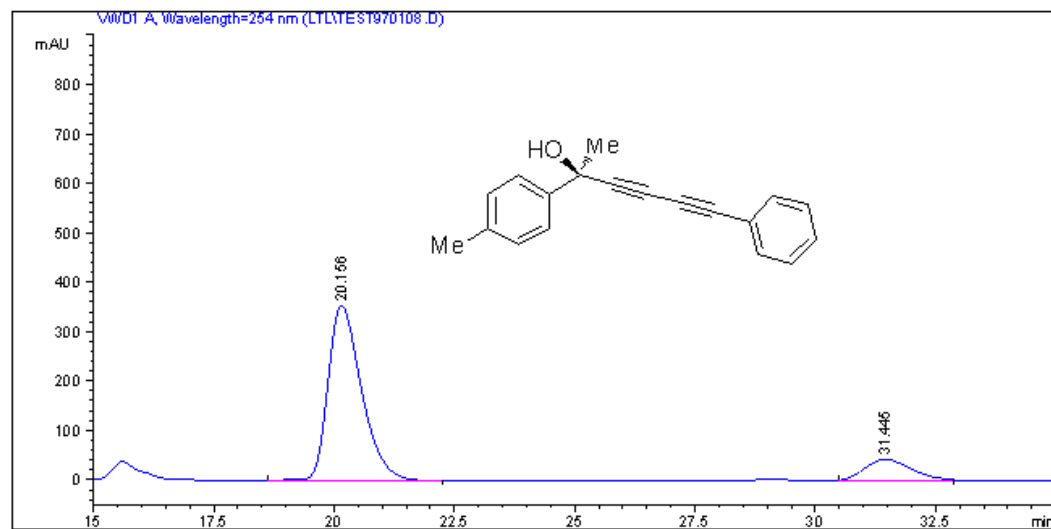

Signal 1: VWD1 A, Wavelength=254 nm

| Peak # | RetTime [min] | Type | Width [min] | Area mAU   | Area %  | Height [mAU] |
|--------|---------------|------|-------------|------------|---------|--------------|
| 1      | 20.156        | EB   | 0.7439      | 1.70995e4  | 85.8087 | 354.10083    |
| 2      | 31.445        | MM   | 1.1094      | 2827.96802 | 14.1913 | 42.48532     |

Sample Info : 254nm,IB, i-PrOH : Hexane = 5:95, 1.0 mL/min

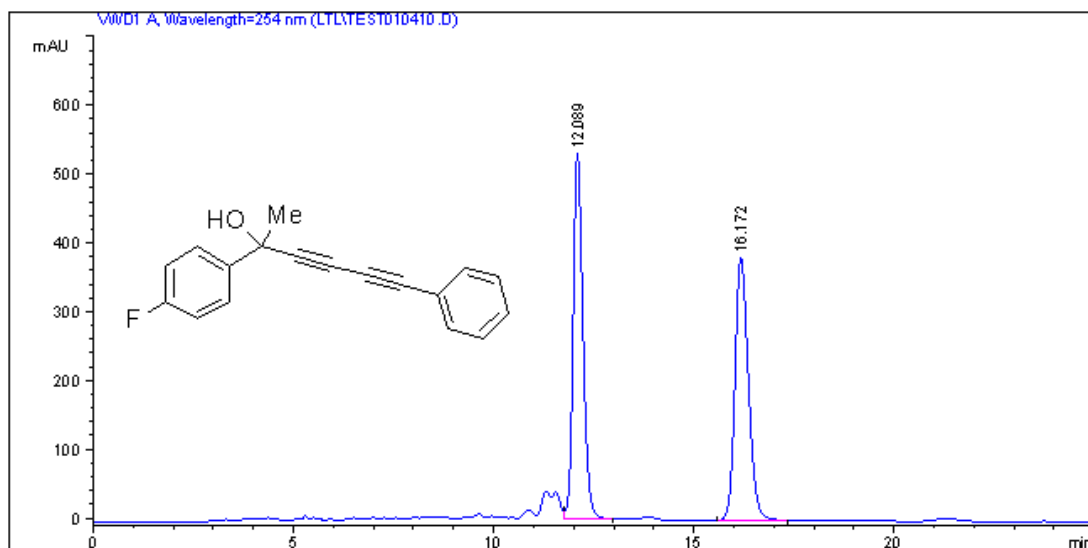

Signal 1: VWD1 A, Wavelength=254 nm

| Peak # | RetTime [min] | Type | Width [min] | Area mAU   | Area %  | Height [mAU] |
|--------|---------------|------|-------------|------------|---------|--------------|
| 1      | 12.089        | VB   | 0.2594      | 9023.03906 | 50.3720 | 531.11072    |
| 2      | 16.172        | BB   | 0.3573      | 8889.76660 | 49.6280 | 382.10690    |

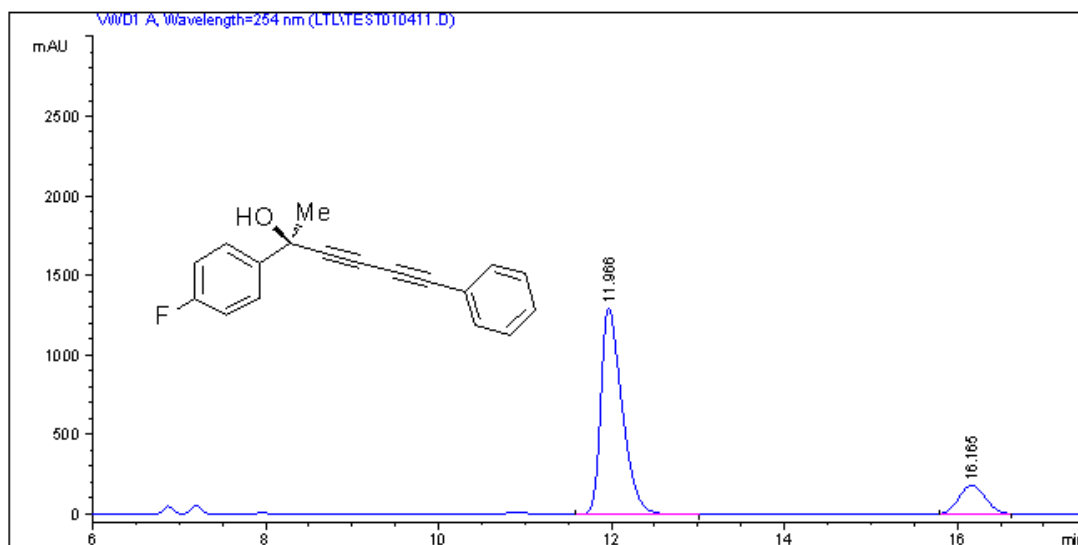

Signal 1: VWD1 A, Wavelength=254 nm

| Peak # | RetTime [min] | Type | Width [min] | Area mAU   | Area %  | Height [mAU] |
|--------|---------------|------|-------------|------------|---------|--------------|
| 1      | 11.966        | VB   | 0.2582      | 2.23129e4  | 85.4606 | 1301.65479   |
| 2      | 16.165        | BBA  | 0.3365      | 3796.07324 | 14.5394 | 178.77954    |

Sample Info : 254nm,IB, i-PrOH : Hexane = 5:95, 1.0 mL/min

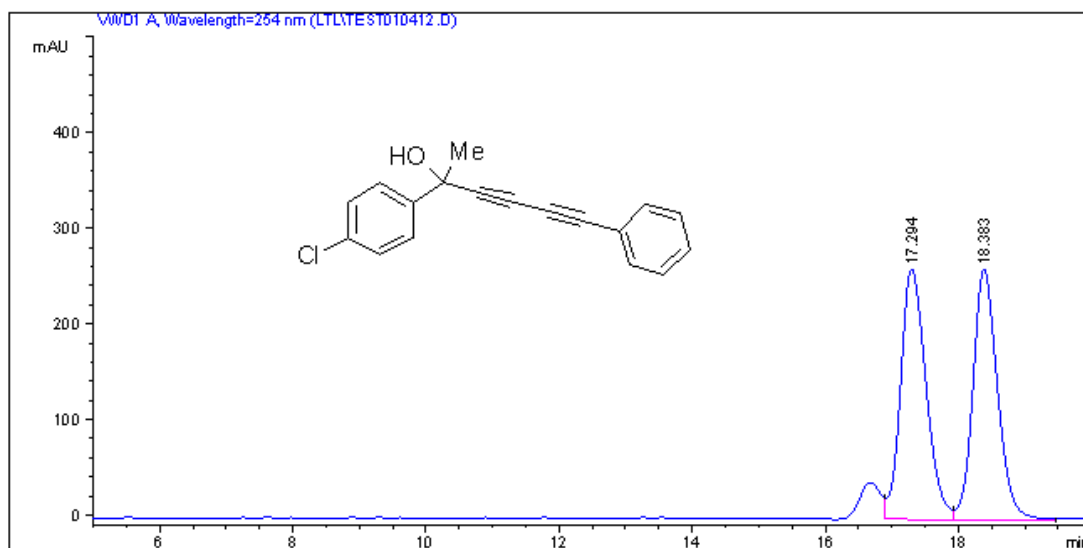

Signal 1: VWD1 A, Wavelength=254 nm

| Peak # | RetTime [min] | Type | Width [min] | Area mAU   | Area %  | Height [mAU] |
|--------|---------------|------|-------------|------------|---------|--------------|
| 1      | 17.294        | VV   | 0.4119      | 6924.96436 | 50.8728 | 261.83704    |
| 2      | 18.383        | VB   | 0.3878      | 6687.33643 | 49.1272 | 262.26413    |

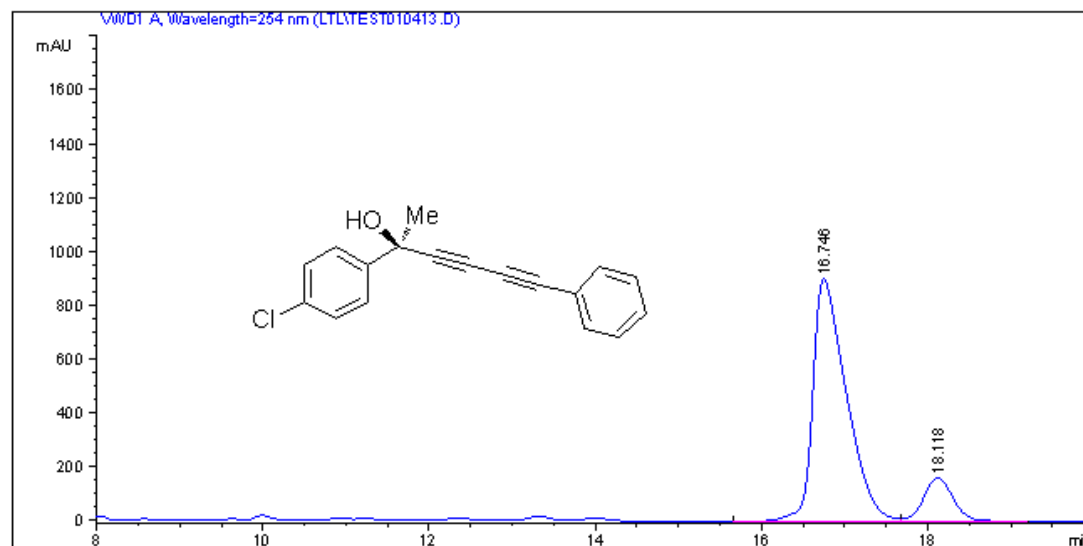

Signal 1: VWD1 A, Wavelength=254 nm

| Peak # | RetTime [min] | Type | Width [min] | Area mAU   | Area %  | Height [mAU] |
|--------|---------------|------|-------------|------------|---------|--------------|
| 1      | 16.746        | BV   | 0.4117      | 2.51384e4  | 86.4132 | 900.29480    |
| 2      | 18.118        | VB   | 0.3815      | 3952.52905 | 13.5868 | 160.77248    |

Sample Info : 254nm, IB, i-PrOH : Hexane = 20:80, 0.8 mL/min

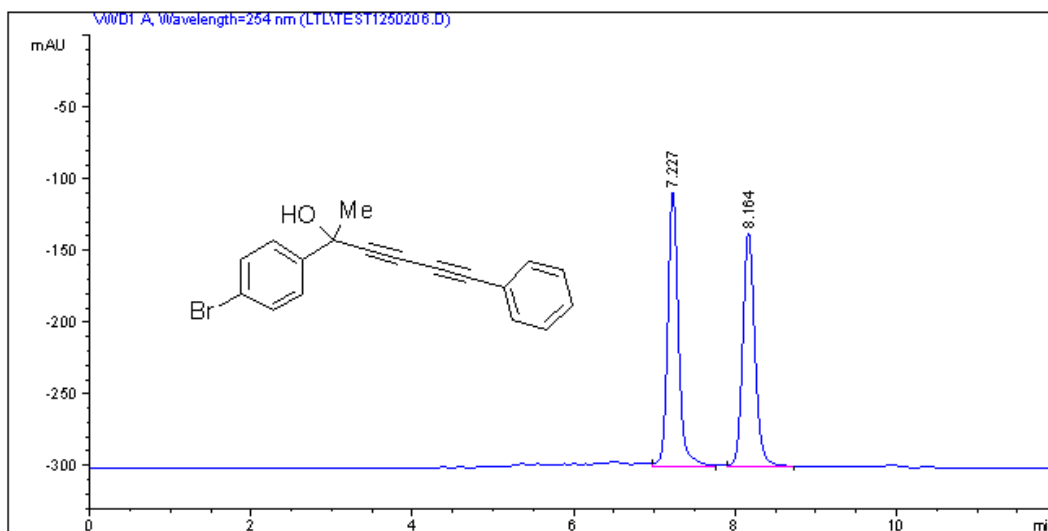

Signal 1: VWD1 A, Wavelength=254 nm

| Peak # | RetTime [min] | Type | Width [min] | Area mAU *s | Height [mAU] | Area %  |
|--------|---------------|------|-------------|-------------|--------------|---------|
| 1      | 7.227         | BBA  | 0.1388      | 1715.82678  | 190.15863    | 50.4731 |
| 2      | 8.164         | BB   | 0.1588      | 1683.66382  | 162.45650    | 49.5269 |

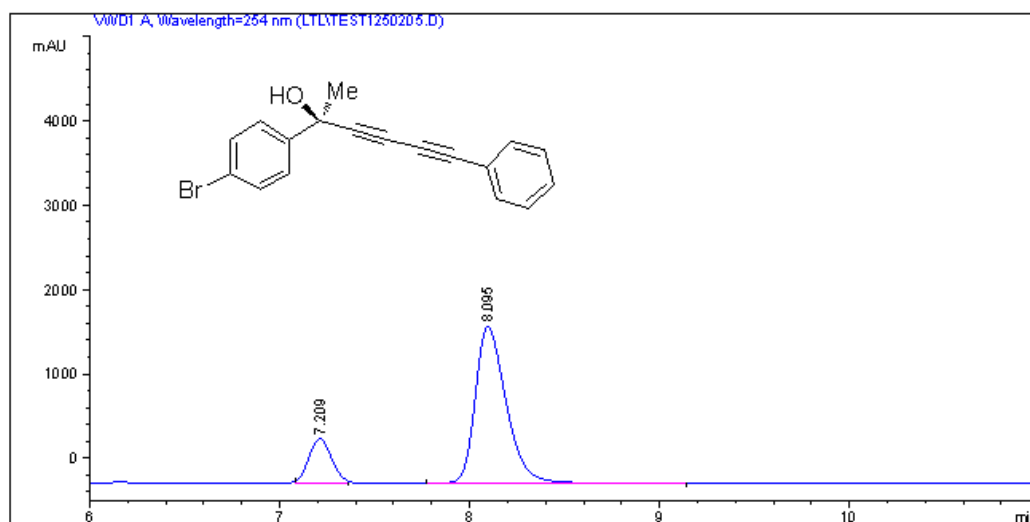

Signal 1: VWD1 A, Wavelength=254 nm

| Peak # | RetTime [min] | Type | Width [min] | Area mAU *s | Height [mAU] | Area %  |
|--------|---------------|------|-------------|-------------|--------------|---------|
| 1      | 7.209         | MM   | 0.1415      | 4567.57812  | 537.92682    | 17.7920 |
| 2      | 8.095         | VV   | 0.1731      | 2.11045e4   | 1860.79565   | 82.2080 |

Sample Info : 254nm, OD-H, i-PrOH : Hexane =20:80, 0.8 mL/min

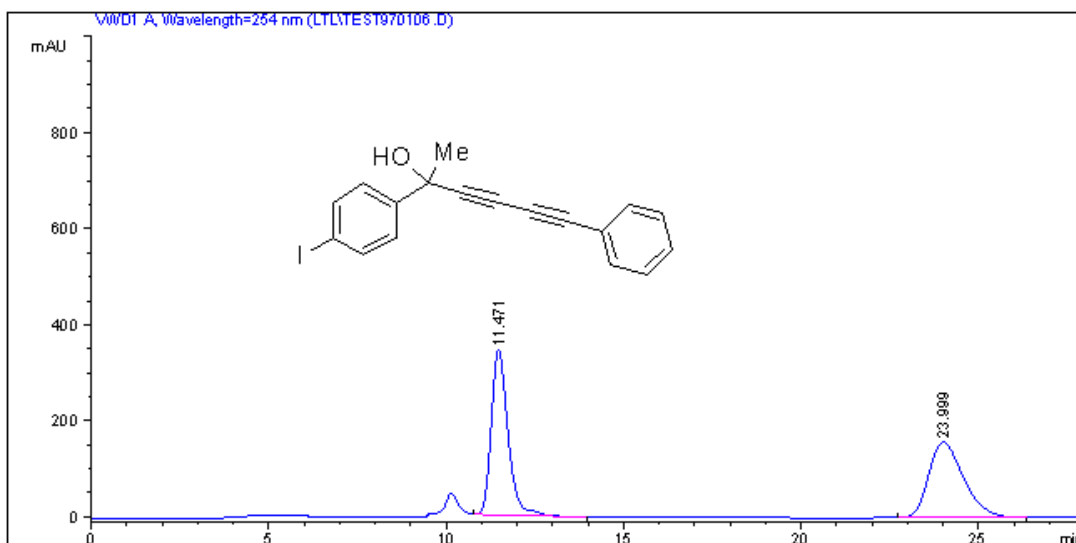

Signal 1: VWD1 A, Wavelength=254 nm

| Peak # | RetTime [min] | Type | Width [min] | Area mAU *s | Height [mAU] | Area %  |
|--------|---------------|------|-------------|-------------|--------------|---------|
| 1      | 11.471        | BB   | 0.4998      | 1.12254e4   | 342.97769    | 50.9495 |
| 2      | 23.999        | BB   | 1.0532      | 1.08070e4   | 157.62984    | 49.0505 |

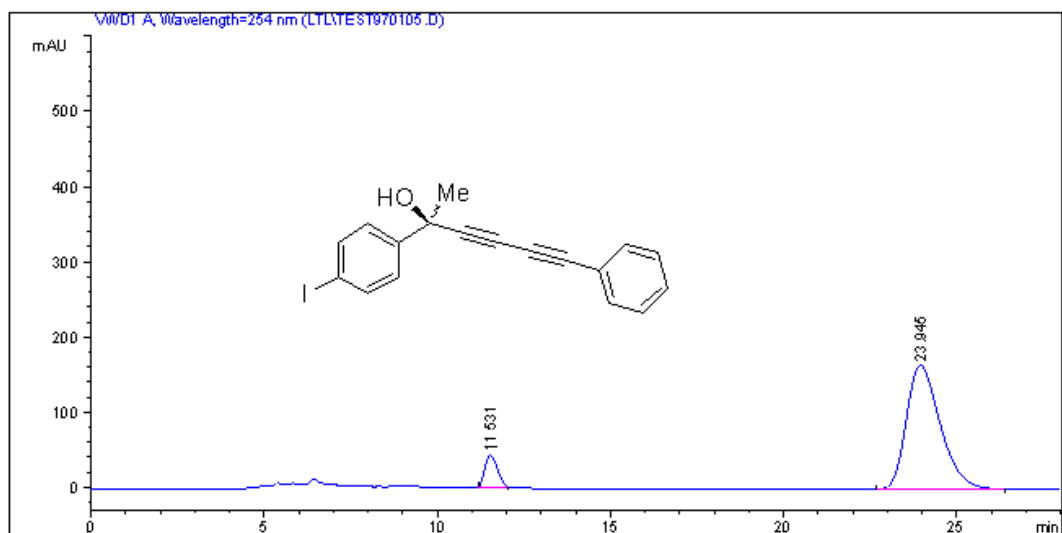

Signal 1: VWD1 A, Wavelength=254 nm

| Peak # | RetTime [min] | Type | Width [min] | Area mAU *s | Height [mAU] | Area %  |
|--------|---------------|------|-------------|-------------|--------------|---------|
| 1      | 11.531        | MM   | 0.4304      | 1125.42065  | 43.57665     | 9.1415  |
| 2      | 23.945        | BB   | 1.0386      | 1.11857e4   | 164.95369    | 90.8585 |

Sample Info : 254nm, IB, i-PrOH : Hexane = 30:70, 0.8 mL/min

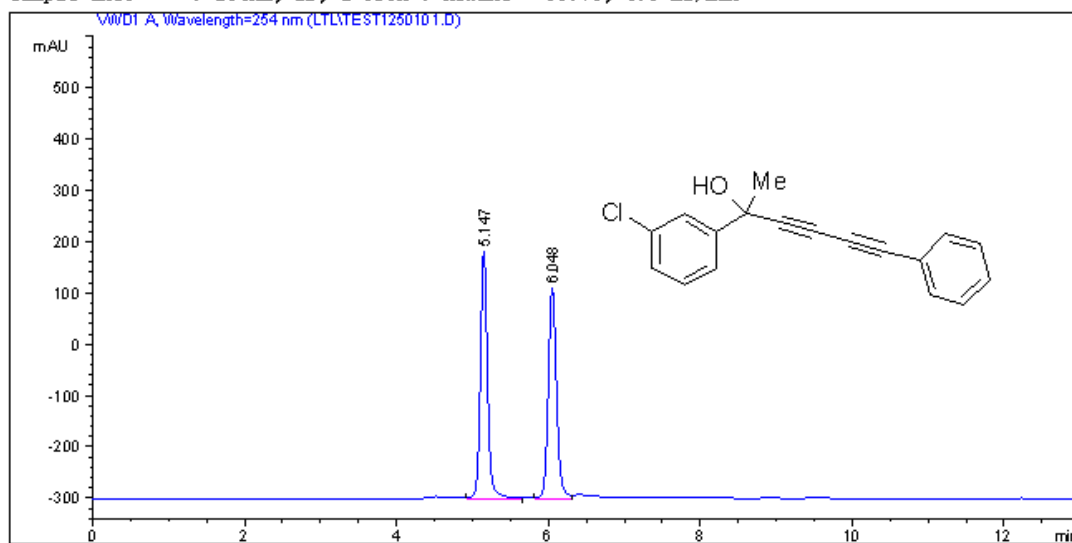

Signal 1: VWD1 A, Wavelength=254 nm

| Peak # | RetTime [min] | Type | Width [min] | Area mAU *s | Height [mAU] | Area %  |
|--------|---------------|------|-------------|-------------|--------------|---------|
| 1      | 5.147         | VV   | 0.1005      | 3196.92187  | 483.32996    | 50.5334 |
| 2      | 6.048         | VV   | 0.1164      | 3129.43115  | 411.24179    | 49.4666 |

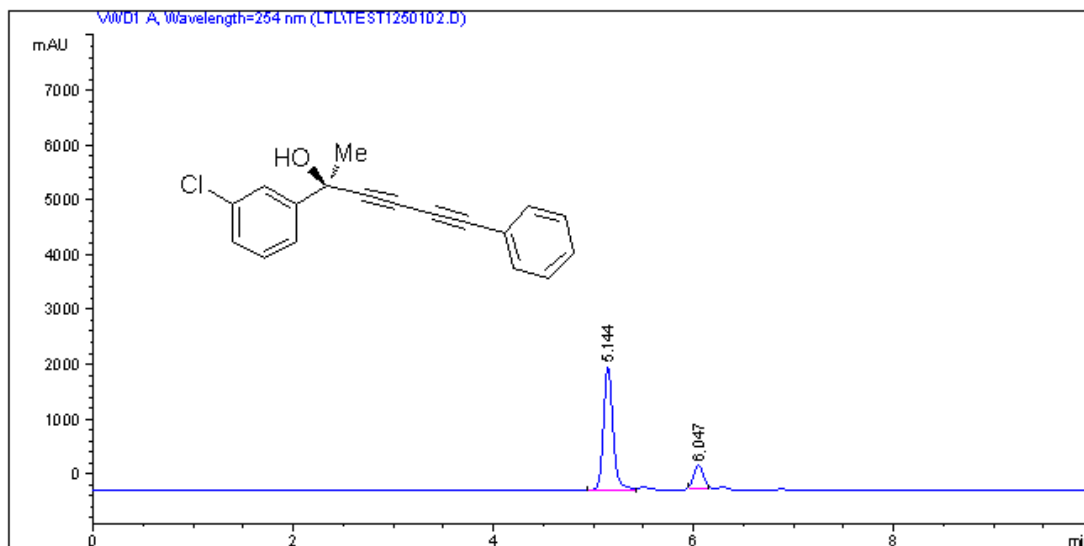

Signal 1: VWD1 A, Wavelength=254 nm

| Peak # | RetTime [min] | Type | Width [min] | Area mAU *s | Height [mAU] | Area %  |
|--------|---------------|------|-------------|-------------|--------------|---------|
| 1      | 5.144         | VV   | 0.1019      | 1.51117e4   | 2243.08691   | 84.8266 |
| 2      | 6.047         | MM   | 0.1086      | 2703.10596  | 414.73950    | 15.1734 |

Sample Info : 254nm, IB, i-PrOH : Hexane = 20:80, 1.0 mL/min

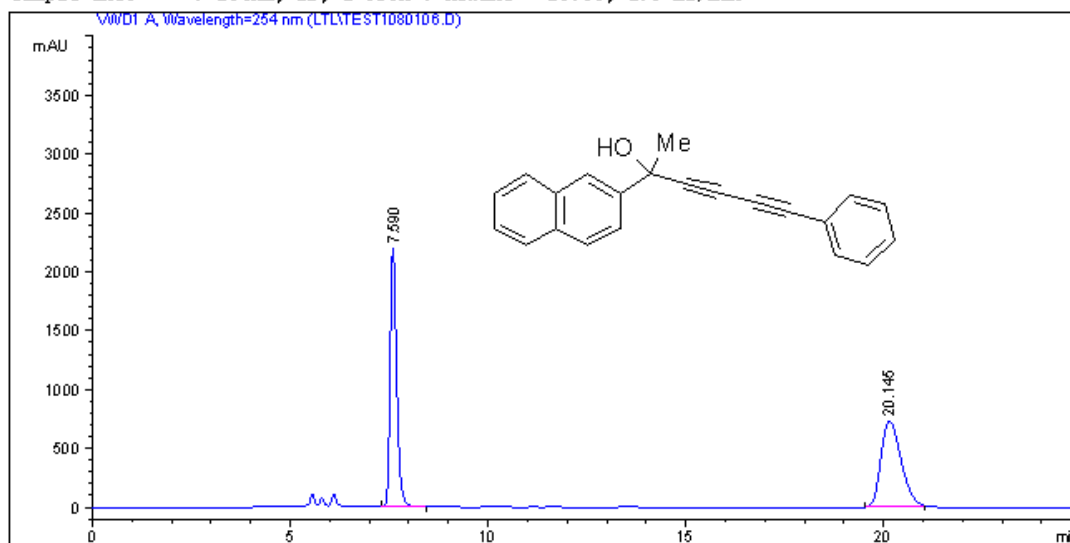

Signal 1: VWD1 A, Wavelength=254 nm

| Peak # | RetTime [min] | Type | Width [min] | Area mAU *s | Height [mAU] | Area %  |
|--------|---------------|------|-------------|-------------|--------------|---------|
| 1      | 7.590         | VV   | 0.1779      | 2.55515e4   | 2197.47607   | 49.4328 |
| 2      | 20.145        | BBA  | 0.5577      | 2.61379e4   | 732.21826    | 50.5672 |

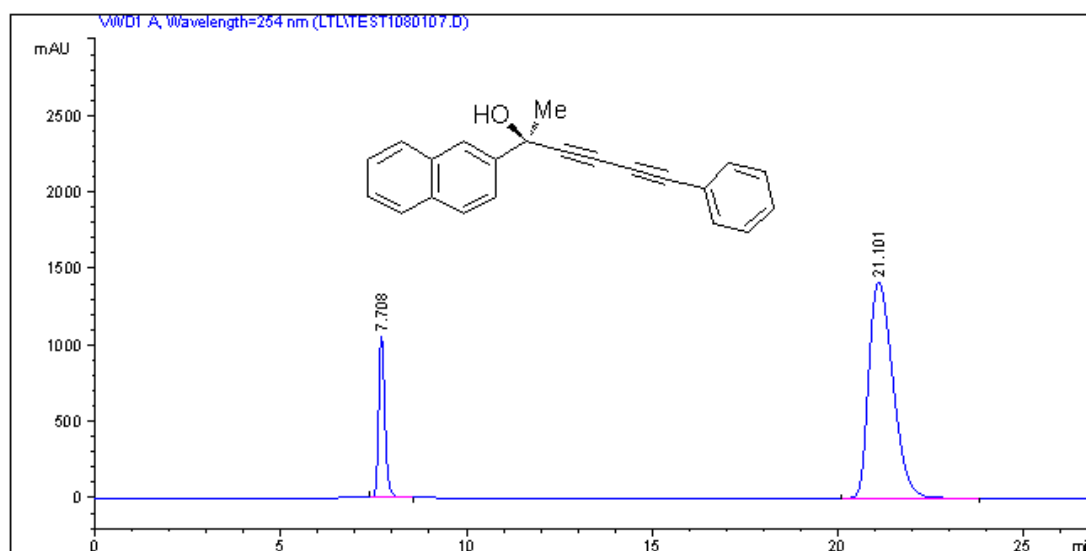

Signal 1: VWD1 A, Wavelength=254 nm

| Peak # | RetTime [min] | Type | Width [min] | Area mAU *s | Height [mAU] | Area %  |
|--------|---------------|------|-------------|-------------|--------------|---------|
| 1      | 7.708         | VV   | 0.1754      | 1.21775e4   | 1055.33875   | 16.0573 |
| 2      | 21.101        | BB   | 0.7138      | 6.36601e4   | 1415.83521   | 83.9427 |

Sample Info : 254nm, IB, i-PrOH : Hexane =20:80, 1.0 mL/min

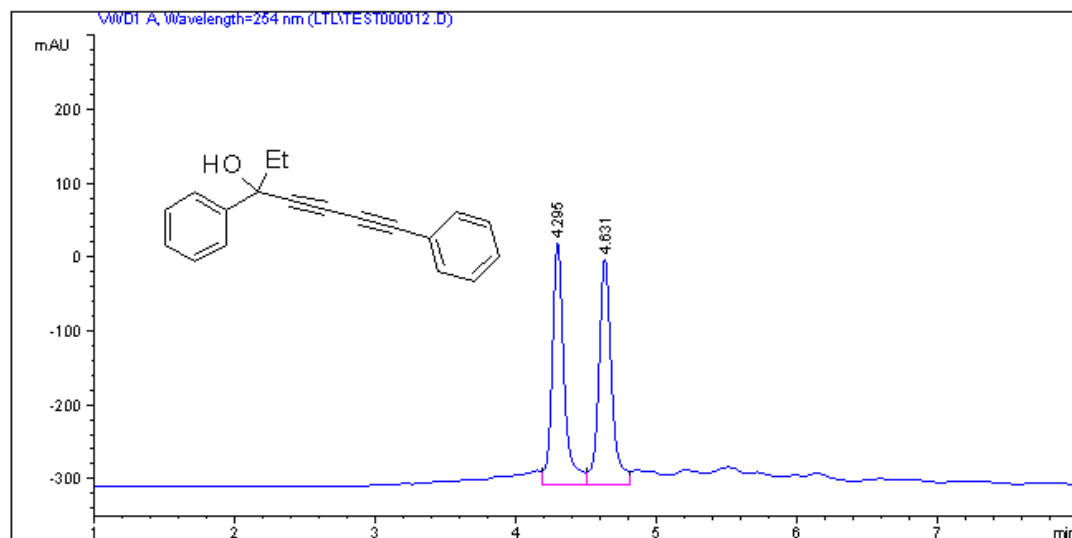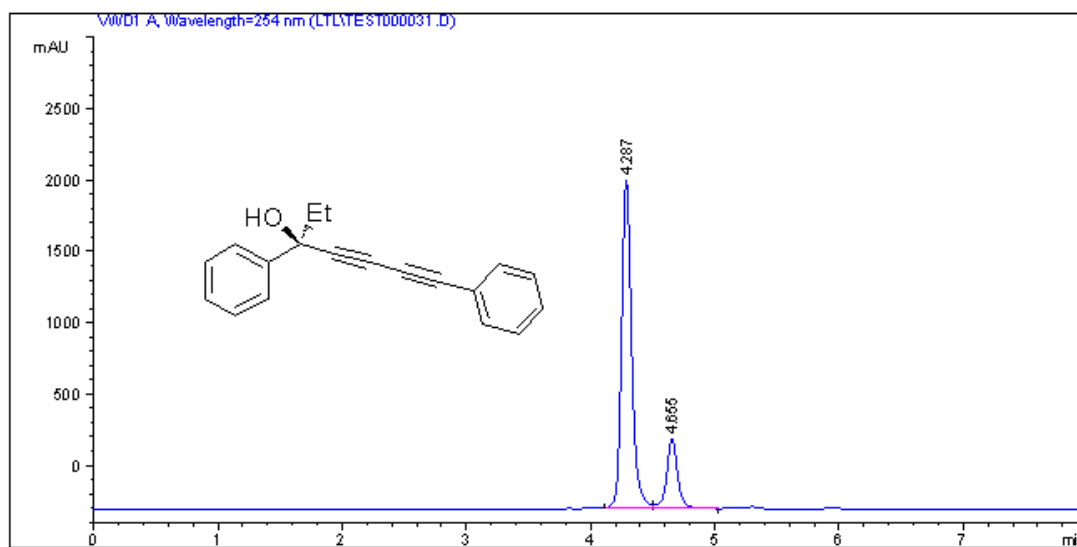



Sample Info : 254nm, IB, i-PrOH : Hexane =10:90, 1.0 mL/min

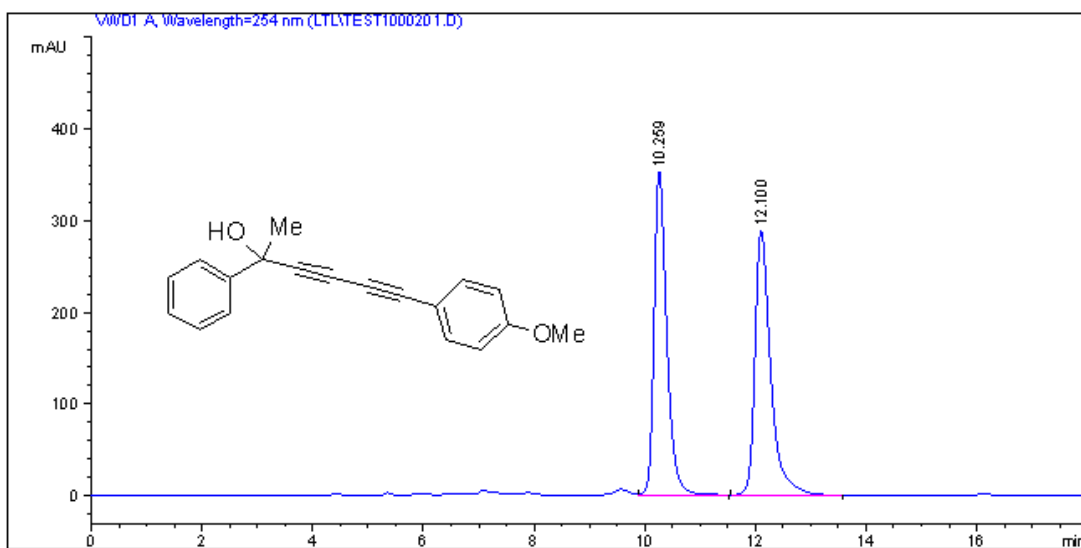

Signal 1: VWD1 A, Wavelength=254 nm

| Peak # | RetTime [min] | Type | Width [min] | Area mAU   | Area %  | Height [mAU] |
|--------|---------------|------|-------------|------------|---------|--------------|
| 1      | 10.259        | VB   | 0.2417      | 5641.81055 | 49.6486 | 353.19366    |
| 2      | 12.100        | BB   | 0.2967      | 5721.67676 | 50.3514 | 288.78970    |

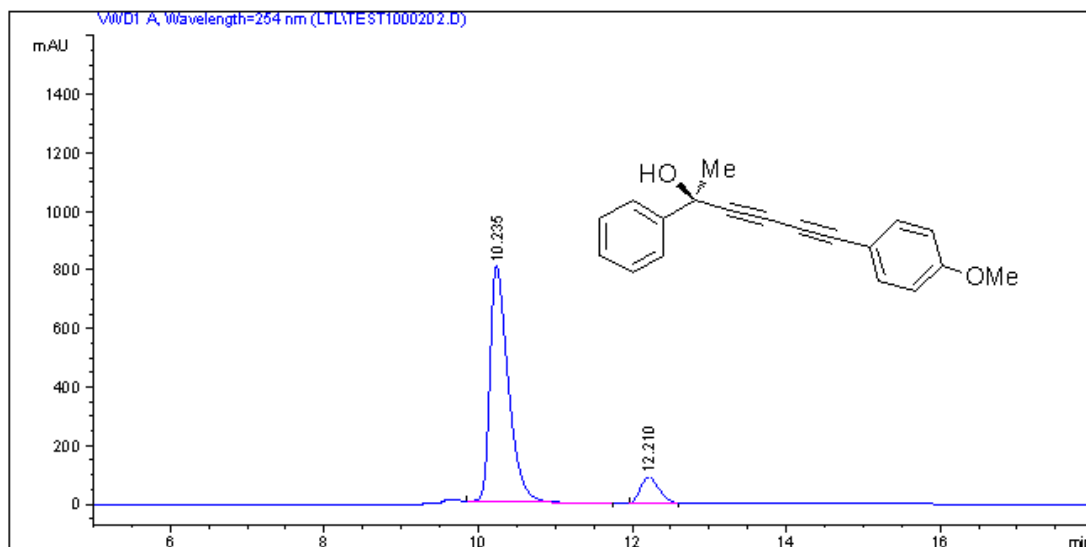

Signal 1: VWD1 A, Wavelength=254 nm

| Peak # | RetTime [min] | Type | Width [min] | Area mAU   | Area %  | Height [mAU] |
|--------|---------------|------|-------------|------------|---------|--------------|
| 1      | 10.235        | BBA  | 0.2481      | 1.31732e4  | 89.7490 | 803.36218    |
| 2      | 12.211        | PM   | 0.2818      | 1504.61536 | 10.2510 | 88.97887     |

Sample Info : 254nm, IB, i-PrOH : Hexane = 20:80, 0.8 mL/min

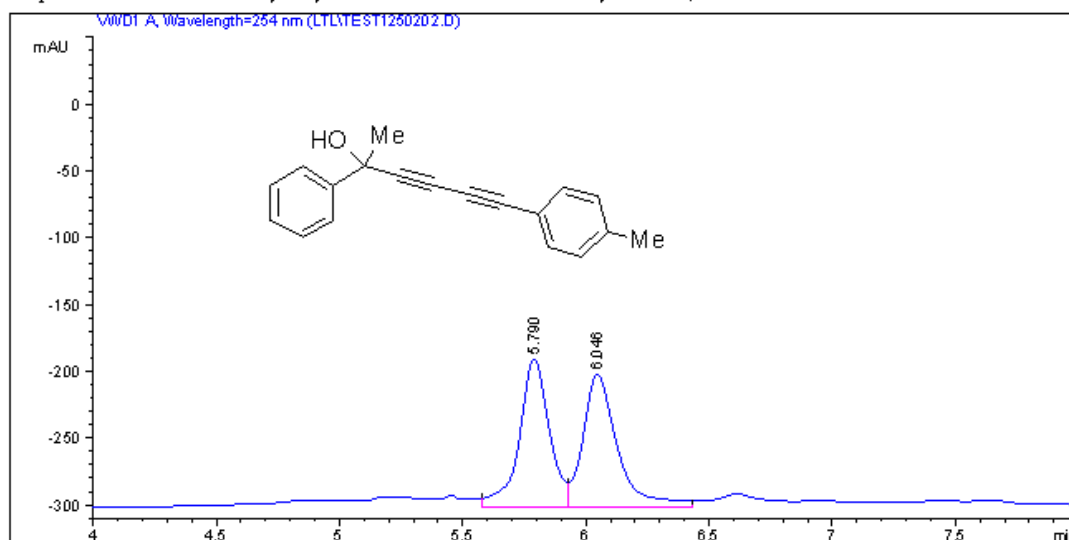

Signal 1: VWD1 A, Wavelength=254 nm

| Peak # | RetTime [min] | Type | Width [min] | Area mAU *s | Height [mAU] | Area %  |
|--------|---------------|------|-------------|-------------|--------------|---------|
| 1      | 5.790         | BV   | 0.1266      | 941.12756   | 110.95915    | 49.3123 |
| 2      | 6.046         | VV   | 0.1425      | 967.37872   | 99.58524     | 50.6877 |

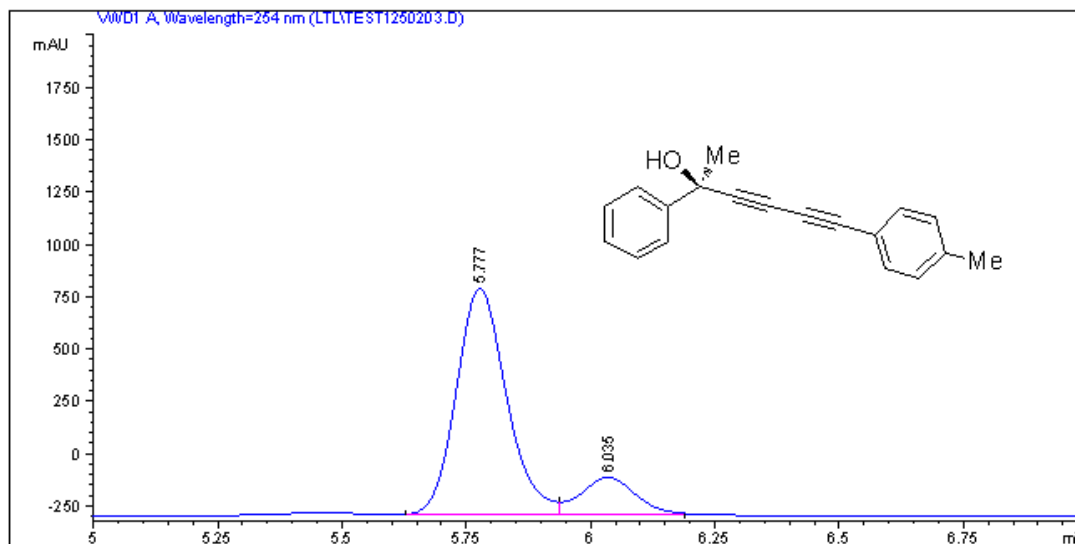

Signal 1: VWD1 A, Wavelength=254 nm

| Peak # | RetTime [min] | Type | Width [min] | Area mAU *s | Height [mAU] | Area %  |
|--------|---------------|------|-------------|-------------|--------------|---------|
| 1      | 5.777         | BV   | 0.1080      | 7586.21826  | 1082.22449   | 84.8561 |
| 2      | 6.035         | VBA  | 0.1152      | 1353.88464  | 177.45412    | 15.1439 |

Sample Info : 254nm, IB, i-PrOH : Hexane = 20:80, 1.0 mL/min

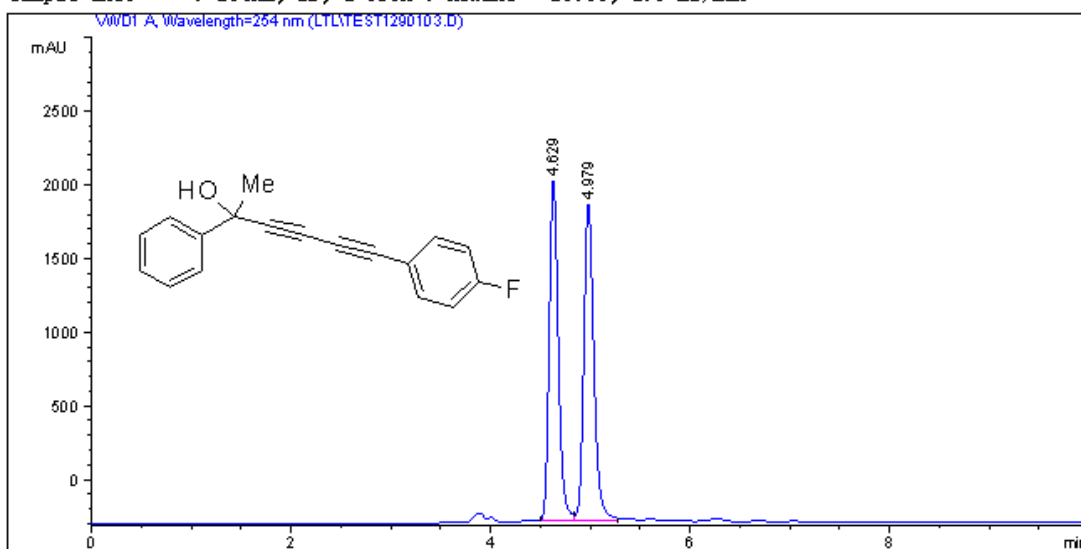

Signal 1: VWD1 A, Wavelength=254 nm

| Peak # | RetTime [min] | Type | Width [min] | Area mAU *s | Height [mAU] | Area %  |
|--------|---------------|------|-------------|-------------|--------------|---------|
| 1      | 4.629         | BV   | 0.0971      | 1.46067e4   | 2309.36890   | 49.3091 |
| 2      | 4.979         | VBA  | 0.1062      | 1.50160e4   | 2149.70557   | 50.6909 |

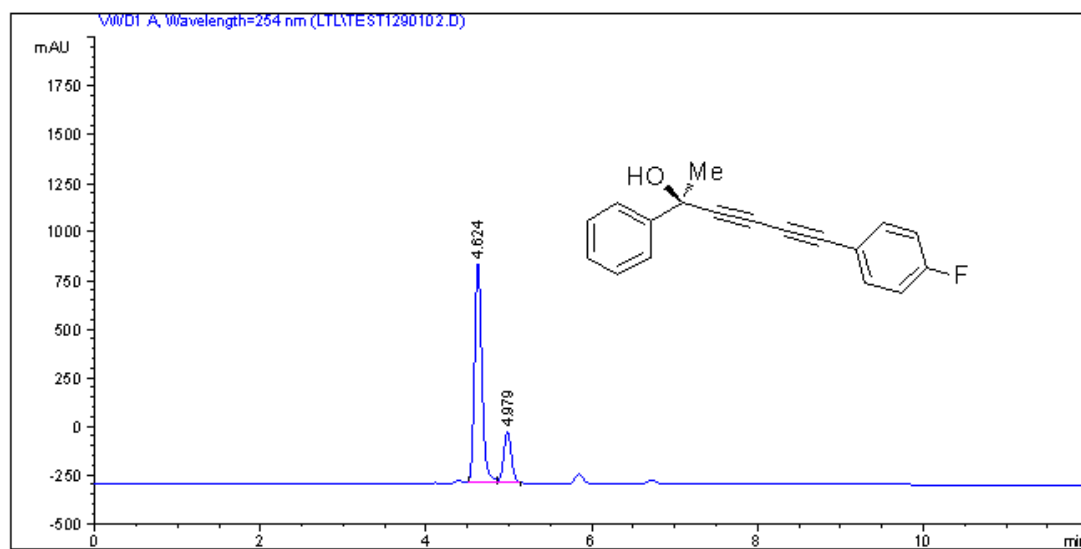

Signal 1: VWD1 A, Wavelength=254 nm

| Peak # | RetTime [min] | Type | Width [min] | Area mAU *s | Height [mAU] | Area %  |
|--------|---------------|------|-------------|-------------|--------------|---------|
| 1      | 4.624         | BV   | 0.0953      | 6956.14404  | 1127.69421   | 81.0143 |
| 2      | 4.979         | VBA  | 0.0982      | 1630.17432  | 258.91681    | 18.9857 |

Sample Info : 254nm, IB, i-PrOH : Hexane = 10:90, 1.0 mL/min

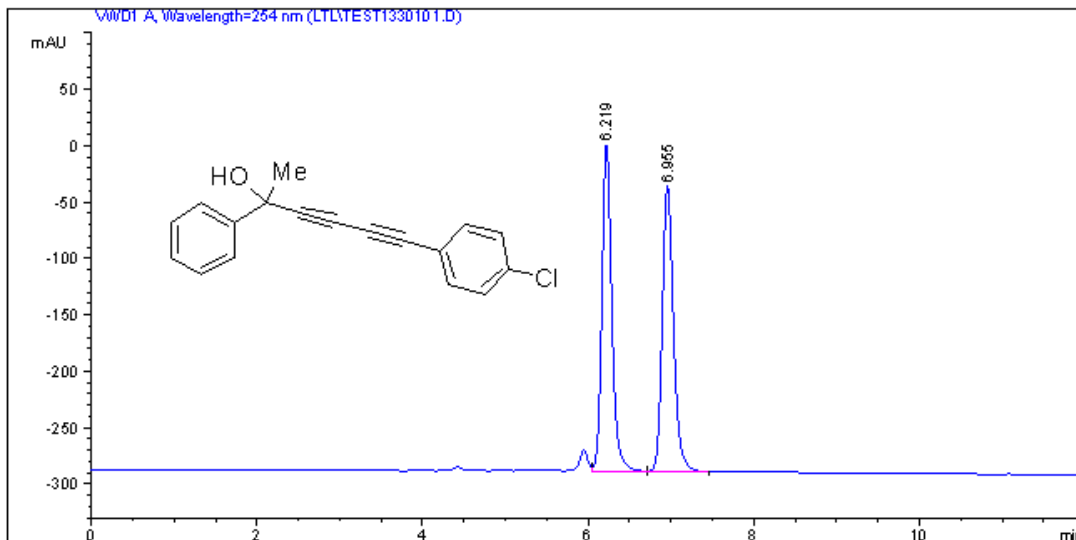

Signal 1: VWD1 A, Wavelength=254 nm

| Peak # | RetTime [min] | Type | Width [min] | Area mAU *s | Height [mAU] | Area %  |
|--------|---------------|------|-------------|-------------|--------------|---------|
| 1      | 6.219         | VV   | 0.1265      | 2418.20972  | 289.79160    | 50.2775 |
| 2      | 6.955         | VB   | 0.1437      | 2391.51685  | 253.07774    | 49.7225 |

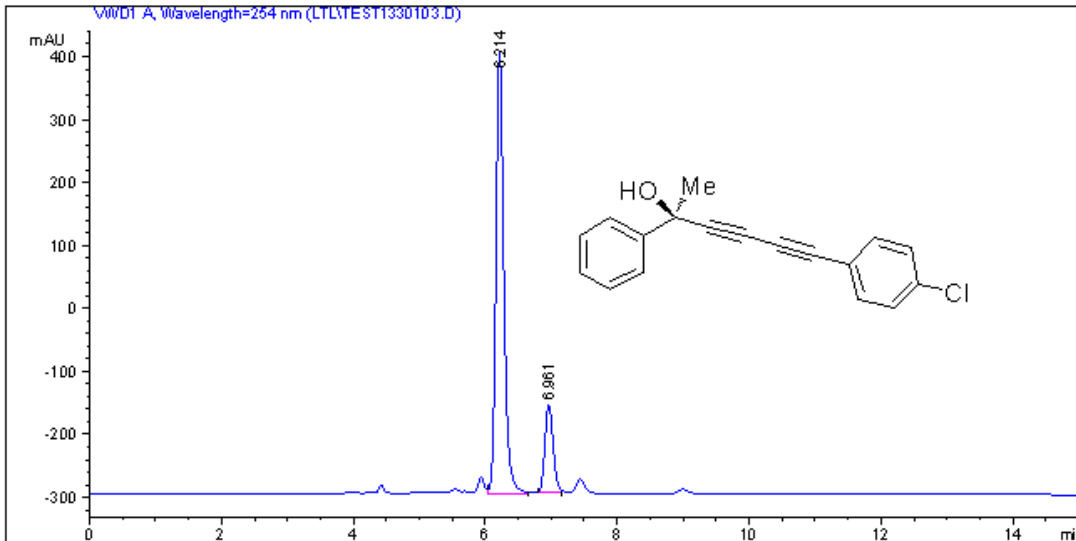

Signal 1: VWD1 A, Wavelength=254 nm

| Peak # | RetTime [min] | Type | Width [min] | Area mAU *s | Height [mAU] | Area %  |
|--------|---------------|------|-------------|-------------|--------------|---------|
| 1      | 6.214         | VBA  | 0.1264      | 5838.34668  | 700.03992    | 82.9353 |
| 2      | 6.961         | BBA  | 0.1348      | 1201.29150  | 138.30208    | 17.0647 |

Sample Info : 254nm, IB, i-PrOH : Hexane =10:90, 1.0 mL/min

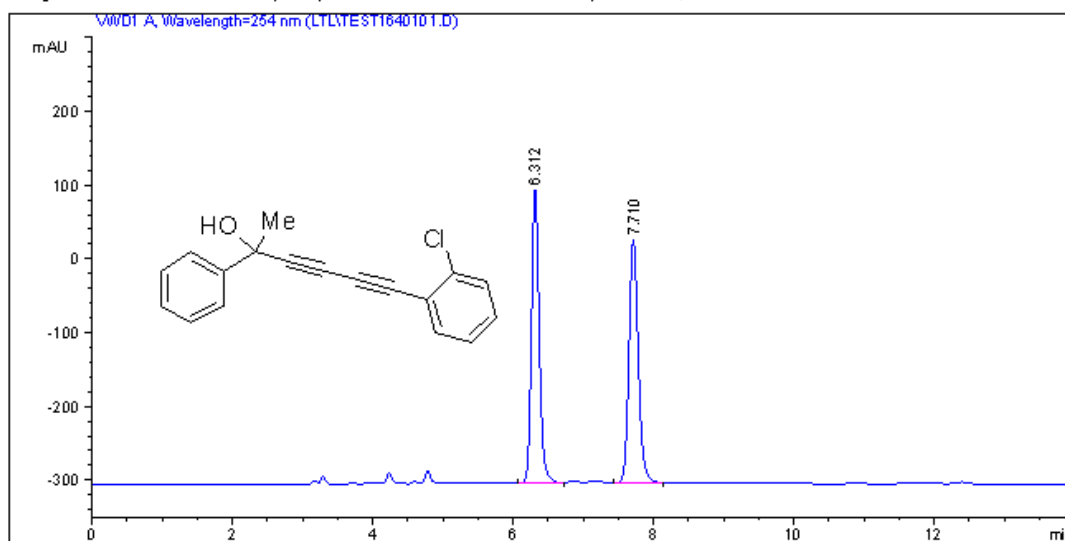

Signal 1: VWD1 A, Wavelength=254 nm

| Peak # | RetTime [min] | Type | Width [min] | Area mAU   | Area %  | Height [mAU] |
|--------|---------------|------|-------------|------------|---------|--------------|
| 1      | 6.312         | BV   | 0.1175      | 3072.30518 | 49.9672 | 399.05151    |
| 2      | 7.710         | VBA  | 0.1437      | 3076.33740 | 50.0328 | 330.01743    |

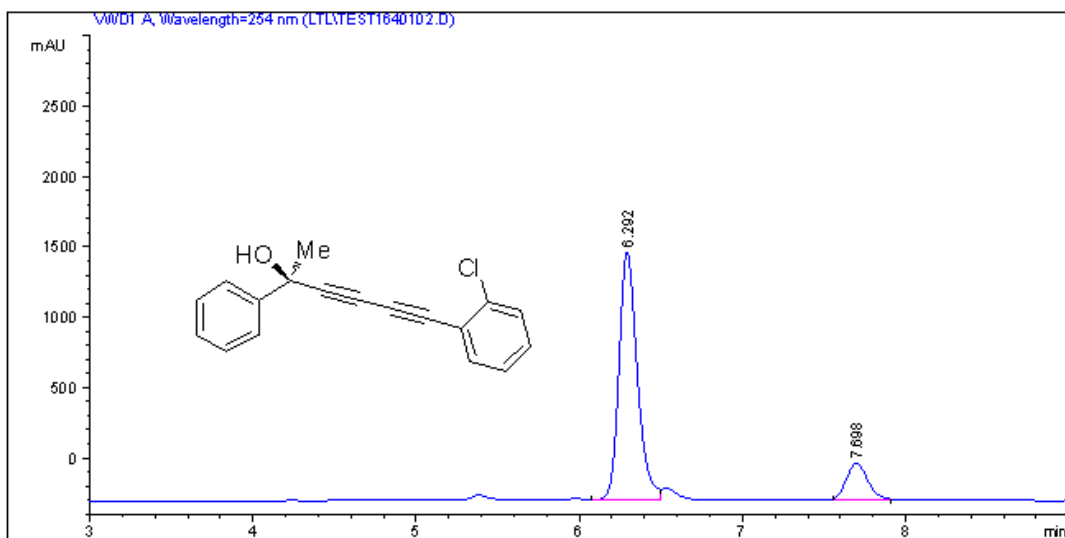

Signal 1: VWD1 A, Wavelength=254 nm

| Peak # | RetTime [min] | Type | Width [min] | Area mAU   | Area %  | Height [mAU] |
|--------|---------------|------|-------------|------------|---------|--------------|
| 1      | 6.292         | VV   | 0.1204      | 1.38310e4  | 85.5481 | 1768.05591   |
| 2      | 7.698         | BBA  | 0.1398      | 2336.51855 | 14.4519 | 256.43332    |

Sample Info : 254nm, IB, i-PrOH : Hexane = 10:90, 1.0 mL/min

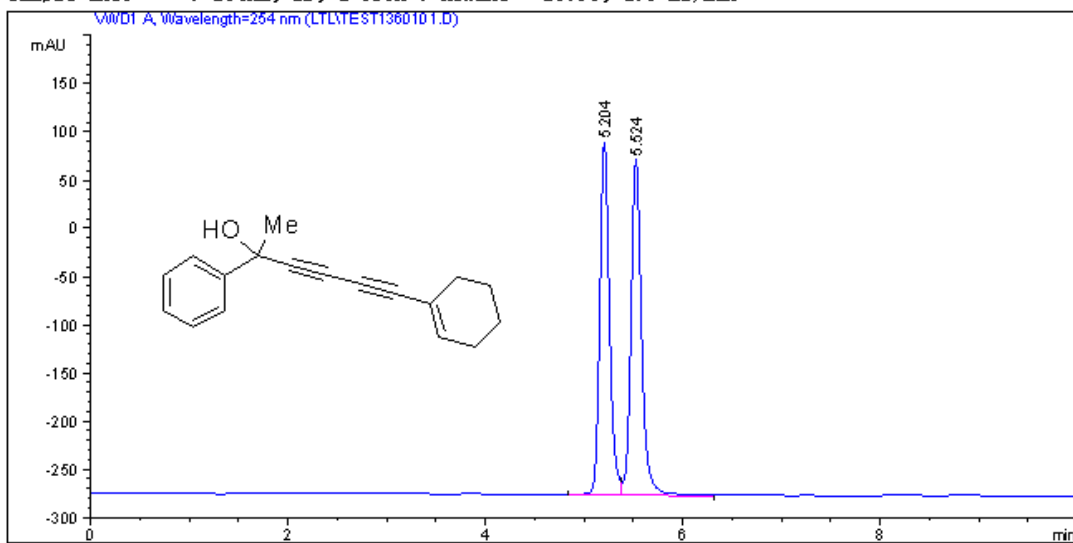

Signal 1: VWD1 A, Wavelength=254 nm

| Peak # | RetTime [min] | Type | Width [min] | Area mAU   | Area %  | Height [mAU] |
|--------|---------------|------|-------------|------------|---------|--------------|
| 1      | 5.204         | VV   | 0.1052      | 2525.16260 | 49.1025 | 366.32806    |
| 2      | 5.524         | VV   | 0.1124      | 2617.47192 | 50.8975 | 348.42822    |

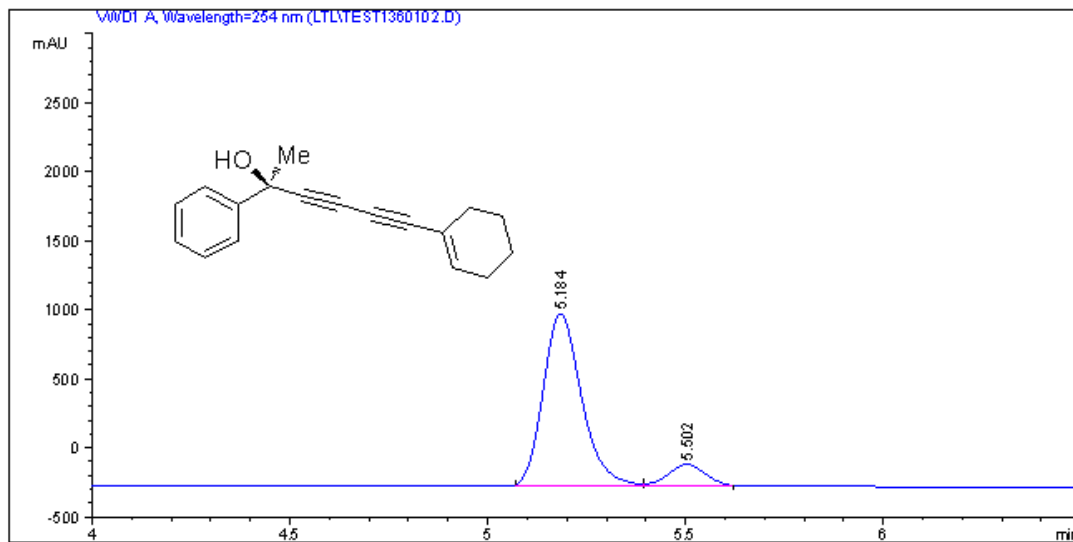

Signal 1: VWD1 A, Wavelength=254 nm

| Peak # | RetTime [min] | Type | Width [min] | Area mAU   | Area %  | Height [mAU] |
|--------|---------------|------|-------------|------------|---------|--------------|
| 1      | 5.184         | BV   | 0.1033      | 8379.56641 | 89.4064 | 1245.06824   |
| 2      | 5.502         | VBA  | 0.1000      | 992.87726  | 10.5936 | 153.94943    |

Sample Info : 254nm,IA, i-PrOH : Hexane =5:95, 1.0mL/min

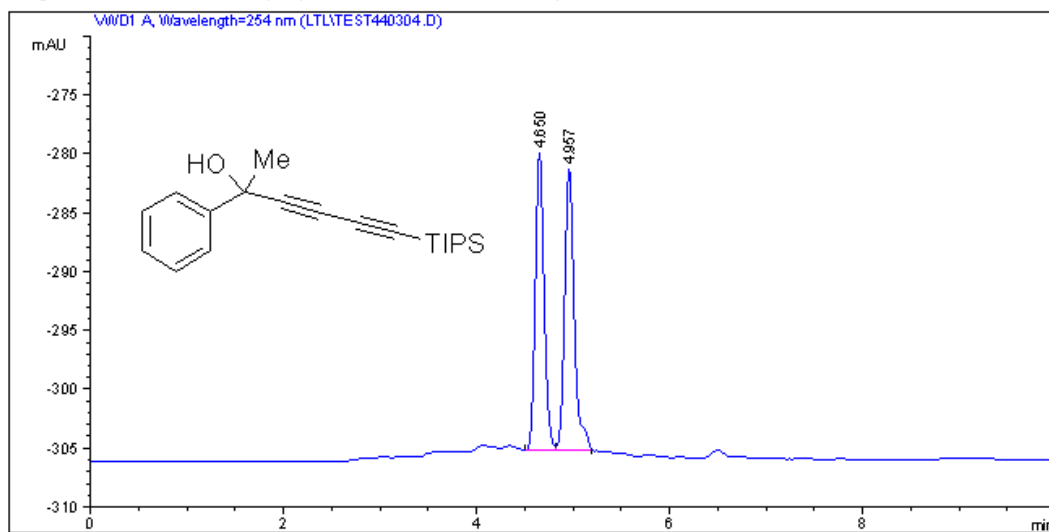

| Peak # | RetTime [min] | Type | Width [min] | Area mAU *s | Height [mAU] | Area %  |
|--------|---------------|------|-------------|-------------|--------------|---------|
| 1      | 4.650         | BV   | 0.0969      | 159.38727   | 25.25359     | 49.0439 |
| 2      | 4.957         | VBA  | 0.1058      | 165.60150   | 23.84807     | 50.9561 |

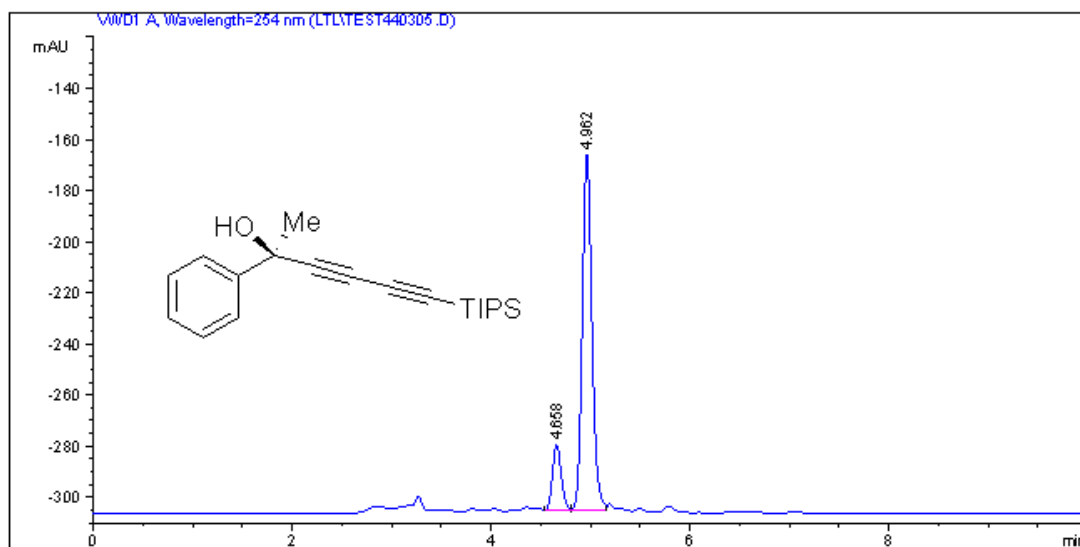

Signal 1: VWD1 A, Wavelength=254 nm

| Peak # | RetTime [min] | Type | Width [min] | Area mAU *s | Height [mAU] | Area %  |
|--------|---------------|------|-------------|-------------|--------------|---------|
| 1      | 4.658         | BV   | 0.0949      | 157.09421   | 25.59127     | 14.2985 |
| 2      | 4.962         | VV   | 0.1036      | 941.58051   | 139.36656    | 85.7015 |

## 7. Basic crystal data for the product 4

CCDC 830329 contains the supplementary crystallographic data for the product 4.

These data can be obtained free of charge from The Cambridge Crystallographic Data Center via [www.ccdc.cam.ac.uk/data\\_request/cif](http://www.ccdc.cam.ac.uk/data_request/cif).

### checkCIF/PLATON report

Structure factors have been supplied for datablock(s) 110524

No syntax errors found.      CIF dictionary      Interpreting this report

### Datablock: 110524

---

|                        |                 |                    |                |
|------------------------|-----------------|--------------------|----------------|
| Bond precision:        | C-C = 0.0055 Å  | Wavelength=0.71073 |                |
| Cell:                  | a=7.0214 (6)    | b=16.2366 (16)     | c=19.0401 (18) |
|                        | alpha=90        | beta=90            | gamma=90       |
| Temperature:           | 294 K           |                    |                |
|                        | Calculated      | Reported           |                |
| Volume                 | 2170.6 (3)      | 2170.6 (3)         |                |
| Space group            | P 21 21 21      | P2 (1) 2 (1) 2 (   |                |
| Hall group             | P 2ac 2ab       | ?                  |                |
| Moiety formula         | C25 H16 Br N O4 | ?                  |                |
| Sum formula            | C25 H16 Br N O4 | C25 H16 Br N O4    |                |
| Mr                     | 474.29          | 474.30             |                |
| Dx, g cm <sup>-3</sup> | 1.451           | 1.451              |                |
| Z                      | 4               | 4                  |                |
| Mu (mm <sup>-1</sup> ) | 1.925           | 1.925              |                |
| F000                   | 960.0           | 960.0              |                |
| F000'                  | 959.28          |                    |                |
| h, k, lmax             | 9, 21, 24       | 9, 21, 24          |                |
| Nref                   | 2841 [ 4973]    | 4940               |                |
| Tmin, Tmax             | 0.482, 0.583    | 0.391, 0.615       |                |
| Tmin'                  | 0.312           |                    |                |

Correction method= MULTI-SCAN

Data completeness= 1.74/0.99      Theta(max)= 27.500

R(reflections)= 0.0435 ( 3161)      wR2(reflections)= 0.1187 ( 4940)

S = 1.012      Npar= 281

---

The following ALERTS were generated. Each ALERT has the format  
**test-name\_ALERT\_alert-type\_alert-level**.  
Click on the hyperlinks for more details of the test.

---

 **Alert level B**  
PLAT035\_ALERT\_1\_B No \_chemical\_absolute\_configuration info given .      ?

---

 **Alert level C**



Datablock 110524 - ellipsoid plot

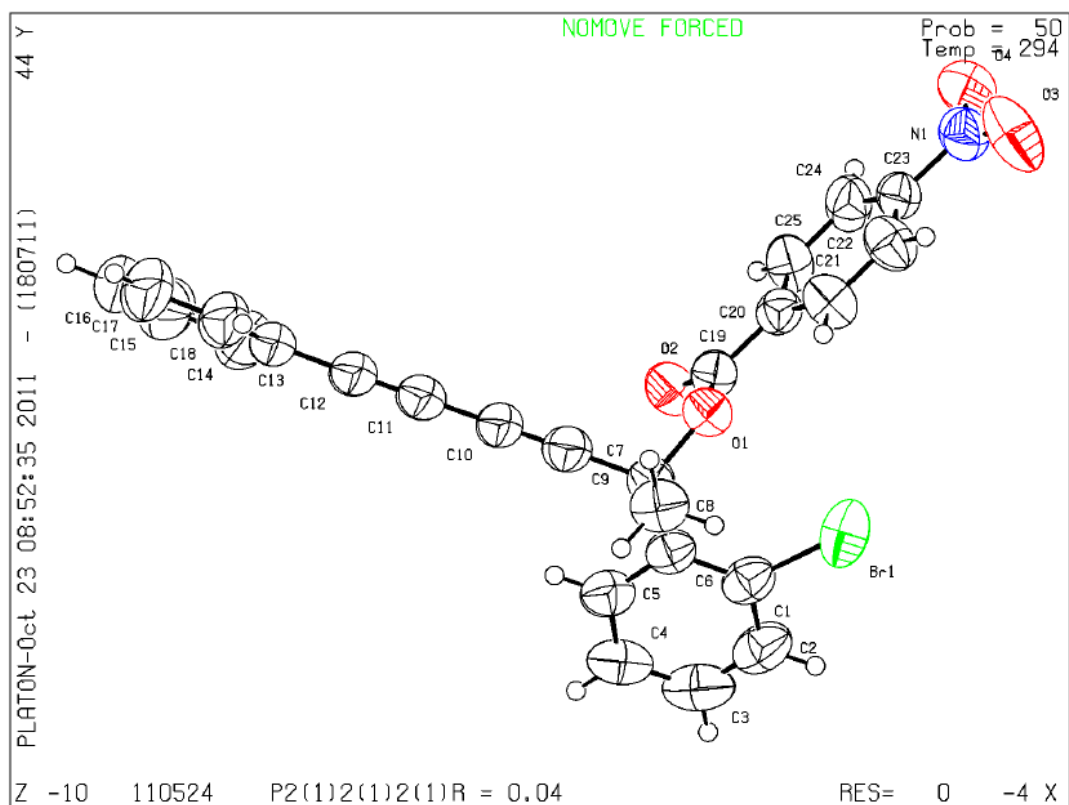

Supplement: c1cc15968b.pdf [file c1cc15968b.pdf]
